# Supplementary material for: Inoculation with Rhizophagus irregularis Does Not Alter Arbuscular Mycorrhizal Fungal Community Structure within the Roots of Corn, Wheat, and Soybean Crops
Source: MDPI journal article supplement (doi:10.3390/microorganisms8010083), 2020-01-07
Supplement: s1 [file s1]

Supplementary materials

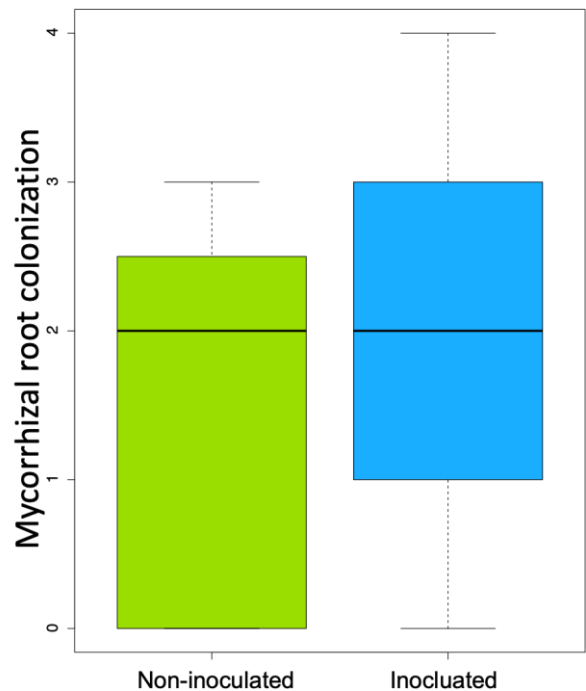

**Figure S1.** on inoculated and non-inoculated samples. AMF inoculation didn't have any significant difference ( $p$ -value>0.05).

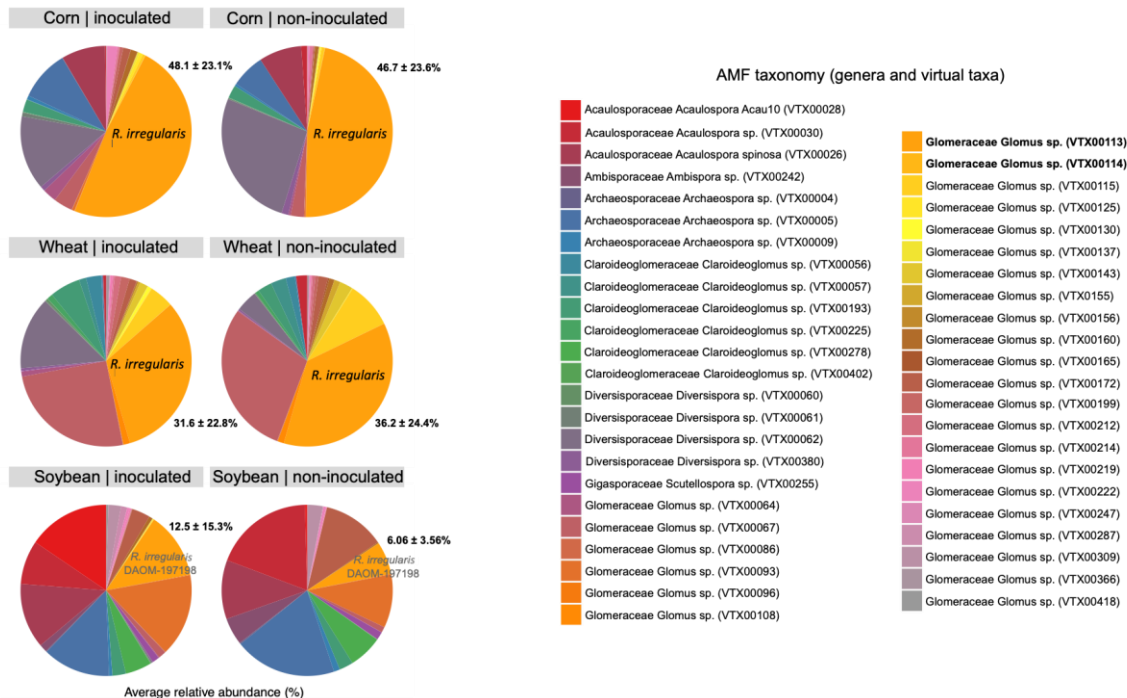

**Figure S2.** Abundance of AMF taxa in inoculated and non-inoculated plots of corn, wheat and soybean. *R. irregularis* represented by VTX00113 and VTX0011, dominated AMF diversity in corn and wheat.

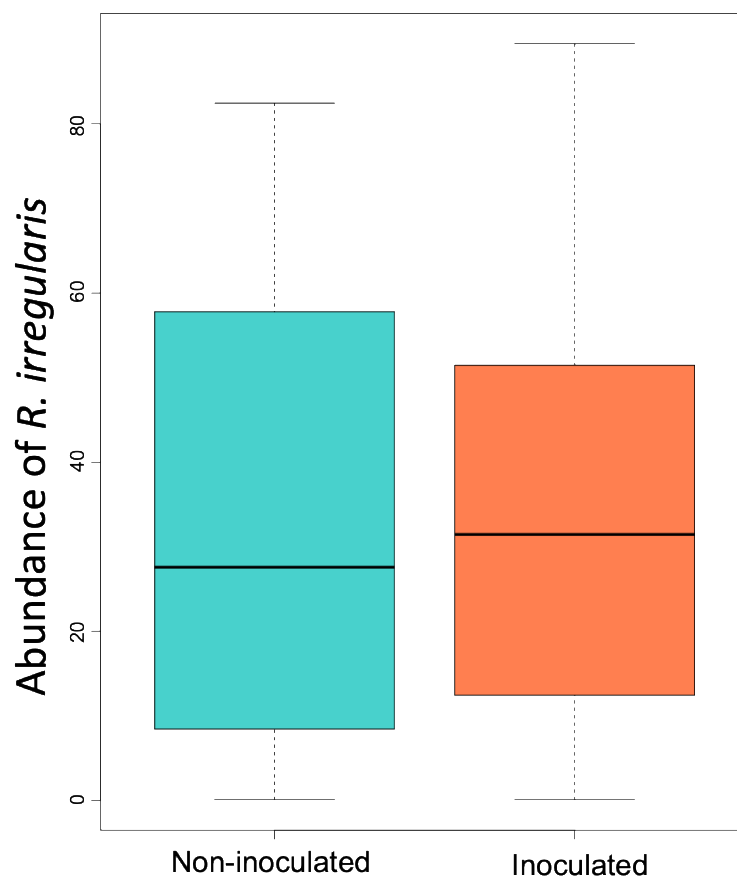

**Figure S3.** No significant differences in the relative abundance of *R. irregularis* in the roots of inoculated and non-inoculated soils ( $p=0.173$ ).

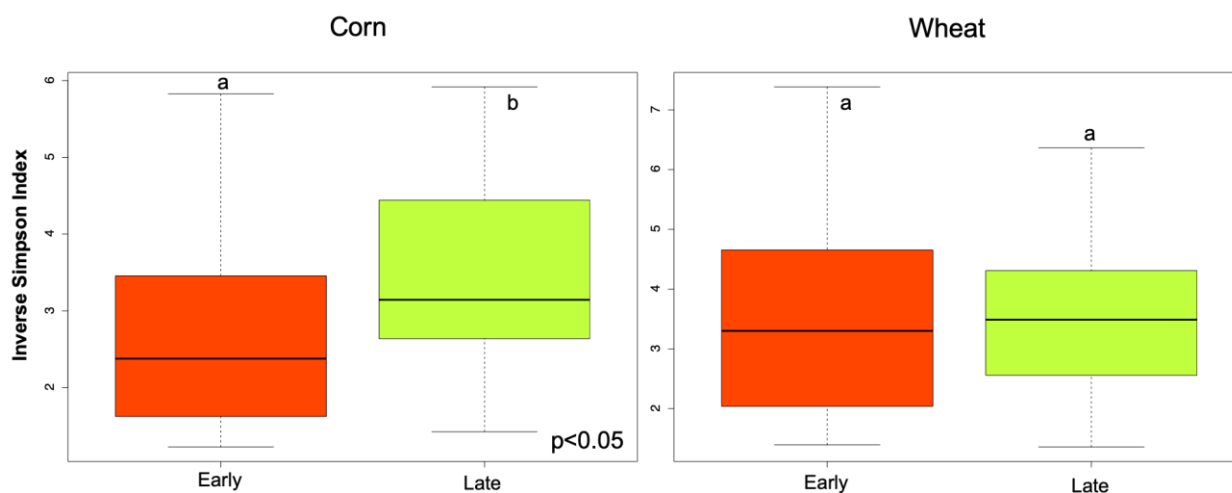

**Figure S4.** Corn roots at a late growth-stage had a higher alpha-diversity than corn roots at an early growth-stage ( $p=0.037$ ), while no significant difference was observed between growing stages in wheat.

**Table S1.** Relative abundance can taxonomy of all 414 OTUs of AMF.

Link

at

GiHub:

[https://github.com/seb951/Premier\\_Tech\\_inoculation/blob/master/results/TableS1\\_OTU\\_VT\\_abundance.txt](https://github.com/seb951/Premier_Tech_inoculation/blob/master/results/TableS1_OTU_VT_abundance.txt)
