# Supplementary material for: Inoculation with Rhizophagus irregularis Does Not Alter Arbuscular Mycorrhizal Fungal Community Structure within the Roots of Corn, Wheat, and Soybean Crops
Source: Microorganisms. 2020 Jan 7;8(1):83. doi: 10.3390/microorganisms8010083 (PMC7023141; doi:10.3390/microorganisms8010083)
Supplement: Supplementary file 1 [file microorganisms-08-00083-s001.zip › microorganisms-665888 suppl.xlsx]

## Sheet: TableS1_OTU_VT_abundance
Table S1. Taxonomic assignment of the 414 AMF unique OTUs and 68 virtual taxa (VT) using the AMF reference sequence database MaarjAM. THE VTs are grouped by crops, growing stages and treatments.
VT "OTU" "E3.BT" "E5.BT" "T1BT.BE" "E9.BE" "T3BT.BE" "E10.BT" "E7.BE" "T4BT.BE" "E8.BE" "E8.BT" "E13.BE" "P4E2.SR3.R4" "E16.BT" "E13.BT" "E6.BT" "T4BT.BT" "E12.BE" "E2.BT" "T2BT.BT" "E2.BE" "B2P3.MV4" "B1P7.MV4" "E15.BT" "T5BT.BE" "T1BT.BT" "T2BT.BE" "E16.BE" "E14.BE" "E1.BT" "E15.BE" "E1.BE" "E12.BT" "E4.BT" "E11.BT" "E11.BE" "E9.BT" "E17.BE" "E14.BT" "E7.BT" "T1.MV4" "B2P2.MV8" "B1P3.MV8" "B3P4…
VTX00024 "OTU2.87233649374205e+32" 0 0 0 0 0 0 0 0 0 0 0 1 0 0 0 0 0 0 0 0 0 44 0 0 0 0 0 0 0 0 0 0 0 0 0 0 0 0 0 10 3 1 5 106 13 12 15 27 15 32 32 3 3395 11 1 4 23 11 2 6 34 7 983 0 1 3 2 0 7 1 1 37 180 15 1 1 356 1 8 1 219 76 0 0 1 0 1 2 0 1 1 1 10 19 11 75 2 5 7 2 189 157 10 0 12 0 320 6 1815 38 665 236 236 8 474 24 "D_0__Eukaryota; D_1__Opisthokonta; D_2__Nucletmycea; D_3__Fungi; D_4__Glomero…
VTX00024 "OTU1.87652343176897e+32" 4 2 1 0 2 4 1 0 1 8 3 216 1 2 2 1 1 1 2 2 902 12356 0 2 2 2 3 2 3 2 1 1 4 1 4 22 1 1 2 4078 2051 141 3921 23177 5216 6037 4783 8116 6178 8543 10083 807 3787 3350 235 2174 9696 6636 826 2117 4225 3196 3695 540 400 1665 721 495 2283 522 255 11907 15621 4452 1010 2141 1850 1405 3372 1573 2786 19793 166 826 1 980 338 845 743 263 127 232 3854 6614 2787 12049 1336 868…
VTX00024 "OTU5.58031619832953e+32" 0 0 0 0 0 0 0 0 0 1 0 0 0 0 0 0 0 0 0 0 3 37 0 0 0 0 0 0 0 0 0 0 0 0 0 0 0 0 0 7 2 0 10 37 17 18 14 16 4 30 36 2 0 14 1 5 25 35 2 0 6 9 2 0 5 4 2 3 8 1 1 9 12 16 0 5 4 3 10 12 22 48 1 3 0 2 2 2 2 3 0 0 1 11 5 21 0 5 7 1 2 0 11 3 0 0 3 0 8 2 2 19 1 20 1 14 "D_0__Eukaryota; D_1__Opisthokonta; D_2__Nucletmycea; D_3__Fungi; D_4__Glomeromycota; D_5__Incertae Sedis; D…
VTX00024 "OTU7.11717566060791e+32" 0 0 0 0 0 0 0 0 0 0 0 0 0 0 0 0 0 0 0 0 0 4 0 0 0 0 0 0 0 0 0 0 0 0 0 0 0 0 0 1 0 0 2 7 2 0 1 3 3 1 5 1 0 0 0 1 5 0 1 0 3 0 0 0 0 3 0 0 1 0 0 1 2 2 0 0 0 0 0 0 0 10 0 0 0 1 0 0 1 0 0 0 0 3 0 11 0 0 0 1 0 0 0 0 0 0 0 0 0 0 0 0 0 2 1 10 "D_0__Eukaryota; D_1__Opisthokonta; D_2__Nucletmycea; D_3__Fungi; D_4__Glomeromycota; D_5__Incertae Sedis; D_6__Glomeromycetes; D…
VTX00024 "OTU7.51735836325242e+32" 0 0 0 1 0 0 0 0 0 0 0 0 0 1 0 0 0 0 0 0 45 1132 0 0 0 0 0 0 0 0 1 0 0 0 0 4 0 0 0 183 99 0 106 1727 490 456 369 426 525 914 728 90 0 246 4 105 824 276 162 162 365 188 4 0 0 66 30 0 207 6 0 194 330 318 0 90 33 0 89 0 0 1800 0 60 0 72 11 0 71 11 0 0 0 352 229 1215 0 27 162 83 98 3 269 1 0 0 0 4 220 1 1 0 51 278 101 1407 "D_0__Eukaryota; D_1__Opisthokonta; D_2__Nuc…
VTX00024 "OTU1.72215578932189e+32" 0 0 0 0 0 0 0 0 0 0 0 0 0 0 0 0 0 0 0 0 0 26 0 0 0 0 0 0 0 0 0 0 0 0 0 0 0 0 0 4 9 0 15 51 6 26 11 26 5 19 23 3 12 22 1 11 34 41 1 1 13 4 2 0 0 1 0 0 5 1 0 99 16 12 4 4 3 3 11 0 14 51 0 2 0 2 4 0 3 0 0 0 0 9 13 39 4 0 11 5 1 2 16 10 0 2 0 0 1 1 1 2 1 16 4 5 "D_0__Eukaryota; D_1__Opisthokonta; D_2__Nucletmycea; D_3__Fungi; D_4__Glomeromycota; D_5__Incertae Sedis;…
VTX00026 "OTU3.18658987636631e+32" 0 0 0 0 0 0 0 0 0 0 0 0 0 0 0 0 0 0 0 0 0 0 0 0 0 0 0 0 0 0 0 0 0 0 0 0 0 0 0 0 0 0 0 0 0 0 0 0 0 0 0 0 14 0 0 0 0 0 0 0 0 0 1 0 0 0 0 0 0 0 0 0 57 0 0 0 0 0 0 0 0 0 0 0 0 0 0 0 0 0 0 0 0 0 0 0 2 0 0 3 1 1 26 1 0 0 4 11 8 8 3 2 0 0 5 0 "D_0__Eukaryota; D_1__Opisthokonta; D_2__Nucletmycea; D_3__Fungi; D_4__Glomeromycota; D_5__Incertae Sedis; D_6__Glomeromycetes; …
VTX00026 "OTU3.76180997443914e+32" 0 0 0 0 0 0 0 0 0 0 0 0 0 0 0 0 0 0 0 0 0 0 0 0 0 0 0 0 2 0 0 0 0 0 0 0 0 0 0 0 0 0 70 65 0 0 0 36 1284 0 0 0 0 0 0 88 0 0 0 0 1 43 361 0 0 0 0 32 0 0 0 0 687 18 0 0 52 0 0 0 0 0 0 0 0 10 0 0 0 0 0 0 0 0 0 0 0 0 0 93 47 74 214 0 0 0 218 0 0 86 0 410 59 0 1 0 "D_0__Eukaryota; D_1__Opisthokonta; D_2__Nucletmycea; D_3__Fungi; D_4__Glomeromycota; D_5__Incertae Sedis…
VTX00026 "OTU3.12328788557476e+32" 0 0 0 0 0 0 0 0 0 0 0 0 0 0 0 0 0 0 0 0 2 53 0 0 0 0 0 0 0 0 0 0 0 0 0 0 0 0 0 0 6 4 30 32 0 3 31 50 491 30 105 0 20 7 15 9 25 17 4 0 1 14 3 2 237 1 4 5 3 0 2 12 14 14 0 2 1 0 53 0 2 18 19 28 0 3 11 2 7 0 3 115 2 5 0 1 3 33 3 80 17 0 3 5 0 2 18 0 5 10 0 54 42 3 0 11 "D_0__Eukaryota; D_1__Opisthokonta; D_2__Nucletmycea; D_3__Fungi; D_4__Glomeromycota; D_5__Incert…
VTX00026 "OTU5.187335679814e+30" 0 1 0 0 0 1 0 1 0 4 0 0 0 0 0 0 0 0 0 0 0 0 0 0 0 0 0 0 0 0 0 0 0 0 0 0 0 0 1 0 0 1 0 0 0 0 0 0 0 0 0 0 1235 0 0 0 0 0 2 0 0 0 402 0 0 0 1 0 0 0 0 0 2566 0 0 1 33 0 0 0 52 0 1 0 1 0 0 0 0 0 0 1 0 0 0 0 1515 0 0 538 95 176 3336 1259 0 114 1343 2357 1539 1204 1117 354 0 1 1341 0 "D_0__Eukaryota; D_1__Opisthokonta; D_2__Nucletmycea; D_3__Fungi; D_4__Glomeromycota; D_…
VTX00026 "OTU4.11463338857097e+31" 0 0 0 0 0 0 0 0 0 0 0 0 0 0 0 0 0 0 0 0 0 0 0 0 0 0 0 0 0 0 0 0 0 0 0 0 0 0 0 0 0 0 0 0 0 0 0 0 0 0 0 0 6 0 0 0 0 0 0 0 0 0 2 0 0 0 0 0 0 0 0 0 5 0 0 0 0 0 0 0 0 0 0 0 0 0 0 0 0 0 0 0 0 0 0 0 1 0 0 0 0 1 9 3 0 0 4 2 3 2 5 0 0 0 4 0 "D_0__Eukaryota; D_1__Opisthokonta; D_2__Nucletmycea; D_3__Fungi; D_4__Glomeromycota; D_5__Incertae Sedis; D_6__Glomeromycetes; D_7_…
VTX00026 "OTU5.46134411670025e+32" 0 0 0 0 0 0 0 0 0 0 0 0 0 0 0 0 0 0 0 0 2 19 0 0 0 0 0 0 0 0 0 0 0 0 0 0 0 0 0 0 5 1 3 16 2 6 3 6 10 14 16 2 28 7 30 8 29 28 3 0 4 15 16 6 37 4 10 7 2 1 3 33 15 11 0 1 1 0 4 0 6 4 19 6 0 2 39 7 2 0 10 17 2 3 3 2 6 4 6 8 36 0 8 10 0 1 50 0 2 11 3 54 26 4 0 12 "D_0__Eukaryota; D_1__Opisthokonta; D_2__Nucletmycea; D_3__Fungi; D_4__Glomeromycota; D_5__Incertae Sedis…
VTX00026 "OTU3.97006375555371e+31" 0 0 0 0 0 0 0 0 0 0 0 0 0 0 0 0 0 0 0 0 0 11 0 0 0 0 0 0 0 0 0 0 0 0 0 0 0 0 0 0 7 3 4 16 2 5 1 12 6 14 19 1 21 7 22 15 16 38 5 0 6 11 12 8 32 3 5 14 1 0 1 19 4 14 0 1 0 0 8 0 4 5 25 12 0 1 18 6 1 1 20 6 4 0 0 1 5 10 6 3 26 0 1 7 0 4 38 0 3 6 1 53 46 0 1 9 "D_0__Eukaryota; D_1__Opisthokonta; D_2__Nucletmycea; D_3__Fungi; D_4__Glomeromycota; D_5__Incertae Sedis; …
VTX00026 "OTU7.85671611986633e+32" 10 3 1 1 4 1 3 3 1 1 1 99 2 4 2 0 1 2 2 2 684 4928 1 2 0 4 0 0 3 3 1 2 4 2 2 9 0 0 7 157 2320 1067 1160 6012 806 1440 584 5008 981 5645 5258 387 8866 2505 9175 4326 9333 9192 3563 41 1727 5548 3156 1985 11975 1907 3162 4006 1037 93 1064 9461 3624 7074 2 937 532 207 2552 2 1108 2584 12506 7396 0 1614 10890 1782 1420 358 5667 4640 2277 613 461 306 1435 4545 1241 1…
VTX00026 "OTU9.75656967215151e+32" 0 0 0 0 1 0 0 0 0 1 0 1 0 0 0 0 0 0 0 0 2 339 0 0 0 0 0 0 0 0 0 0 0 0 0 1 0 0 0 1 150 183 20 328 44 40 14 49 1 242 476 11 5 16 724 74 392 738 2 0 0 94 6 0 13 24 140 294 34 0 0 508 6 171 0 0 38 0 13 0 0 76 177 123 0 32 815 2 85 1 162 50 4 7 1 0 1 24 119 94 5 0 1 1 0 1 154 0 161 3 0 53 9 1 3 8 "D_0__Eukaryota; D_1__Opisthokonta; D_2__Nucletmycea; D_3__Fungi; D_4__…
VTX00026 "OTU1.40148024914772e+31" 0 0 0 0 0 2 0 0 0 0 0 0 0 0 0 0 0 0 0 0 0 0 0 2 0 0 0 0 1 0 0 0 0 0 0 0 0 0 0 0 0 0 0 0 0 0 0 0 1 0 0 0 0 0 0 1 1 0 0 0 0 0 0 0 0 0 0 0 0 0 0 0 116 0 0 0 0 0 0 0 0 0 0 0 0 0 0 0 0 0 0 0 0 0 0 1 0 0 0 1 0 0 5 0 0 0 0 2 249 0 0 0 0 0 0 4 "D_0__Eukaryota; D_1__Opisthokonta; D_2__Nucletmycea; D_3__Fungi; D_4__Glomeromycota; D_5__Incertae Sedis; D_6__Glomeromycetes; …
VTX00026 "OTU5.46147938105381e+32" 0 0 0 0 0 0 0 0 0 0 0 0 0 0 0 0 0 0 0 0 0 0 0 0 0 0 0 0 0 0 0 0 0 0 0 0 0 0 0 0 0 0 0 0 0 0 0 0 0 0 0 0 24 0 0 0 0 0 0 0 0 0 0 0 0 0 0 0 0 0 0 0 30 0 0 0 2 0 0 0 0 0 0 0 0 0 0 0 0 0 0 0 0 0 0 0 0 0 0 3 0 1 39 4 0 0 7 8 21 20 8 1 0 0 3 0 "D_0__Eukaryota; D_1__Opisthokonta; D_2__Nucletmycea; D_3__Fungi; D_4__Glomeromycota; D_5__Incertae Sedis; D_6__Glomeromycetes;…
VTX00026 "OTU2.67971587880506e+32" 0 0 0 0 0 0 0 0 0 0 0 0 0 0 0 0 0 0 0 0 0 0 0 0 0 0 0 0 0 0 0 0 0 0 0 0 0 0 0 0 0 0 0 0 0 0 0 0 1 0 0 0 42 0 0 0 0 0 0 0 0 0 2 0 0 0 0 0 0 0 0 0 64 0 0 0 1 0 0 0 5 0 0 0 0 0 0 0 0 0 0 0 0 0 0 0 18 0 0 15 2 3 77 39 0 0 43 27 68 41 24 9 0 0 22 0 "D_0__Eukaryota; D_1__Opisthokonta; D_2__Nucletmycea; D_3__Fungi; D_4__Glomeromycota; D_5__Incertae Sedis; D_6__Glomerom…
VTX00026 "OTU6.44733695251975e+32" 0 0 1 0 0 0 0 0 0 0 0 0 0 0 0 0 0 0 0 0 0 0 0 0 0 0 0 0 0 0 0 0 0 0 0 0 0 0 0 0 0 0 0 0 0 0 0 0 0 0 0 0 310 0 0 0 0 0 0 0 0 0 1 0 0 0 0 0 0 0 0 0 57 0 0 0 0 0 0 0 0 0 0 0 0 0 0 0 0 0 0 0 0 0 0 0 1 0 0 14 9 23 3 1 0 0 95 2 562 1 107 1 0 0 58 0 "D_0__Eukaryota; D_1__Opisthokonta; D_2__Nucletmycea; D_3__Fungi; D_4__Glomeromycota; D_5__Incertae Sedis; D_6__Glomeromy…
VTX00026 "OTU5.26317811380235e+32" 0 0 1 14 178 47 54 0 22 17 0 0 0 0 0 10 0 0 0 0 0 0 0 43 0 0 0 2 0 0 0 0 0 10 0 0 0 1 0 0 0 1 0 0 0 0 0 0 6 0 0 0 0 0 0 0 0 0 0 0 0 0 0 0 0 0 0 0 0 0 0 0 0 0 0 0 0 0 0 0 0 0 0 0 0 0 0 0 0 0 0 0 0 0 0 0 0 0 0 0 0 0 0 0 2 0 0 0 0 0 0 0 0 0 0 0 "D_0__Eukaryota; D_1__Opisthokonta; D_2__Nucletmycea; D_3__Fungi; D_4__Glomeromycota; D_5__Incertae Sedis; D_6__Glomeromyc…
VTX00026 "OTU1.1558242067025e+32" 0 0 0 0 0 0 0 0 0 0 0 0 0 0 0 0 0 0 0 0 0 0 1 0 0 0 0 0 0 0 0 0 0 0 0 0 0 0 0 0 0 0 21 19 0 2 2 27 75 1 2 0 54 0 0 16 0 0 0 0 0 5 33 0 0 0 0 0 0 0 0 1 351 2 0 0 16 0 3 0 17 1 0 0 0 1 0 0 0 0 0 0 0 2 0 0 8 4 1 24 17 14 26 6 17 8 43 8 17 5 2 132 1 0 65 1 "D_0__Eukaryota; D_1__Opisthokonta; D_2__Nucletmycea; D_3__Fungi; D_4__Glomeromycota; D_5__Incertae Sedis; D_6__…
VTX00026 "OTU3.62761736871807e+32" 0 8 0 0 0 8 0 0 0 0 0 0 0 0 1 0 0 0 0 0 0 0 0 0 0 5 0 0 0 0 0 0 0 0 0 0 0 0 0 0 0 0 0 0 0 0 0 0 0 0 1 0 0 0 0 0 0 0 0 0 0 0 0 0 0 0 0 0 0 0 0 0 2 0 0 0 0 0 0 0 0 0 0 0 0 0 0 0 0 0 0 0 0 0 0 456 0 0 1 9 41 18 0 54 237 0 272 607 0 68 236 0 247 0 415 1 "D_0__Eukaryota; D_1__Opisthokonta; D_2__Nucletmycea; D_3__Fungi; D_4__Glomeromycota; D_5__Incertae Sedis; D_6__Gl…
VTX00026 "OTU8.08041996660229e+32" 0 0 0 0 0 0 0 0 0 0 0 0 0 0 0 0 0 0 0 0 0 0 0 0 0 0 0 0 0 0 0 0 0 0 0 0 0 0 0 0 0 0 0 0 0 0 0 0 9 0 0 0 0 0 0 0 0 0 0 0 0 0 1 0 0 0 0 0 0 0 0 0 15 0 0 0 0 0 0 0 0 0 0 0 0 0 0 0 0 0 0 0 0 0 0 0 0 0 0 0 0 0 2 0 0 0 3 0 0 14 0 1 0 0 0 0 "D_0__Eukaryota; D_1__Opisthokonta; D_2__Nucletmycea; D_3__Fungi; D_4__Glomeromycota; D_5__Incertae Sedis; D_6__Glomeromycetes; D_…
VTX00026 "OTU8.19986595007862e+32" 0 0 0 0 0 0 0 0 0 0 0 0 0 0 0 0 0 0 0 0 0 0 0 0 0 0 0 0 0 0 0 0 0 0 0 0 0 0 0 0 0 0 14 4 0 0 0 5 158 0 0 0 0 0 0 8 0 0 0 0 0 2 38 0 0 0 0 2 0 0 0 0 143 3 0 0 7 0 0 0 0 0 0 0 0 0 0 0 0 0 0 0 0 0 0 0 0 0 0 5 2 7 20 0 0 0 200 0 0 2 0 36 8 0 0 0 "D_0__Eukaryota; D_1__Opisthokonta; D_2__Nucletmycea; D_3__Fungi; D_4__Glomeromycota; D_5__Incertae Sedis; D_6__Glomeromyc…
VTX00026 "OTU5.78373431322785e+32" 0 0 0 0 0 0 0 0 0 0 0 0 0 0 0 0 0 0 0 0 9 31 0 0 0 0 0 0 0 0 0 0 0 0 0 0 0 0 0 0 11 10 3 24 3 5 2 10 0 19 30 2 1 4 31 4 19 44 2 1 5 21 11 2 74 10 7 24 4 0 3 50 18 22 0 0 3 0 8 0 0 4 8 4 0 2 66 9 13 1 21 25 13 4 0 1 5 2 2 5 35 0 0 5 1 12 17 0 20 3 5 76 23 4 0 15 "D_0__Eukaryota; D_1__Opisthokonta; D_2__Nucletmycea; D_3__Fungi; D_4__Glomeromycota; D_5__Incertae Se…
VTX00026 "OTU1.4423344672425e+32" 0 0 0 0 0 0 0 0 0 0 0 0 0 0 0 0 0 0 0 0 0 0 0 0 0 0 0 0 0 0 0 0 0 0 0 0 0 0 0 0 0 0 0 0 0 0 0 0 0 0 0 0 1 0 0 0 0 0 0 0 0 0 0 0 0 0 0 0 0 0 0 0 0 0 0 0 0 0 0 0 0 0 0 0 0 0 0 0 0 0 0 0 0 0 0 0 0 0 0 0 0 0 1 0 0 0 0 0 1 0 0 0 0 0 1 0 "D_0__Eukaryota; D_1__Opisthokonta; D_2__Nucletmycea; D_3__Fungi; D_4__Glomeromycota; D_5__Incertae Sedis; D_6__Glomeromycetes; D_7__…
VTX00026 "OTU2.47078332824994e+32" 0 0 0 0 0 0 0 0 0 0 0 0 0 0 0 0 0 0 0 0 0 0 0 0 0 0 0 0 0 0 0 0 0 0 0 0 0 0 0 0 0 0 0 0 0 0 0 0 0 0 0 0 1 0 0 0 0 0 0 0 0 0 0 0 0 0 0 0 0 0 0 0 1 0 0 0 0 0 0 0 0 0 0 0 0 0 0 0 0 0 0 0 0 0 0 0 0 0 0 0 0 0 0 0 0 0 0 0 2 0 0 0 0 0 0 0 "D_0__Eukaryota; D_1__Opisthokonta; D_2__Nucletmycea; D_3__Fungi; D_4__Glomeromycota; D_5__Incertae Sedis; D_6__Glomeromycetes; D_7_…
VTX00026 "OTU7.16356932848552e+32" 0 0 0 0 3 4 0 0 0 0 0 0 0 0 0 0 0 0 0 0 0 0 0 2 0 0 0 0 5 0 0 0 0 0 0 0 0 0 0 0 0 0 0 1 0 0 0 109 1 0 0 0 0 0 0 0 0 0 0 0 7 0 148 0 0 0 0 0 1 0 0 0 135 0 0 0 6 0 0 0 0 0 0 0 0 11 0 0 0 0 0 0 0 0 0 0 0 0 0 4 0 25 2 0 1 0 2 0 4 133 2 160 89 0 0 0 "D_0__Eukaryota; D_1__Opisthokonta; D_2__Nucletmycea; D_3__Fungi; D_4__Glomeromycota; D_5__Incertae Sedis; D_6__Glomero…
VTX00026 "OTU6.13514447844306e+32" 0 0 0 0 0 0 0 0 0 0 0 0 0 0 0 0 0 0 0 0 1 45 0 0 0 0 0 0 0 0 0 0 0 0 1 0 0 0 0 0 4 0 1 69 4 3 1 31 6 29 24 0 32 4 2 9 56 36 5 0 7 12 21 0 4 1 2 3 1 0 0 35 62 21 0 2 0 0 11 0 2 39 1 8 0 1 2 0 1 0 3 0 1 1 2 3 0 5 3 6 21 0 4 1 0 1 34 0 7 19 2 72 23 0 0 18 "D_0__Eukaryota; D_1__Opisthokonta; D_2__Nucletmycea; D_3__Fungi; D_4__Glomeromycota; D_5__Incertae Sedis; D_6_…
VTX00026 "OTU2.1266323296274e+30" 0 0 0 0 23 16 0 0 0 0 0 0 0 0 0 0 0 0 0 0 0 0 0 5 0 0 0 0 27 0 0 0 0 0 0 0 0 0 0 0 0 0 0 0 0 0 0 1 0 0 0 0 0 0 0 0 0 0 0 0 13 0 0 0 0 0 0 0 0 0 0 0 7 0 0 0 0 0 0 0 0 0 0 0 0 0 0 0 0 0 0 0 0 0 0 0 0 0 0 0 0 0 0 0 0 0 0 0 3 0 0 0 1 0 1 0 "D_0__Eukaryota; D_1__Opisthokonta; D_2__Nucletmycea; D_3__Fungi; D_4__Glomeromycota; D_5__Incertae Sedis; D_6__Glomeromycetes; D…
VTX00026 "OTU8.63073663368183e+32" 0 0 0 0 0 0 0 0 0 0 1 0 0 0 0 0 0 0 0 0 1 54 0 0 0 0 0 0 0 0 0 0 0 0 0 0 1 0 0 0 28 17 2 53 1 19 7 6 1 54 37 3 72 5 43 8 80 82 1 0 14 13 8 1 55 8 9 24 6 1 0 96 7 24 0 5 3 0 4 0 5 6 31 11 0 2 52 2 7 1 21 24 19 15 3 5 7 9 9 10 42 2 33 14 0 23 38 0 25 7 0 100 35 2 0 18 "D_0__Eukaryota; D_1__Opisthokonta; D_2__Nucletmycea; D_3__Fungi; D_4__Glomeromycota; D_5__Incert…
VTX00026 "OTU3.95394633574426e+32" 0 0 0 0 0 0 0 0 0 0 0 0 0 0 0 0 0 0 0 0 0 0 0 0 0 0 0 0 0 0 0 0 0 0 0 0 0 0 0 0 0 0 1 0 0 0 0 0 1 0 0 0 1 0 0 0 0 0 1 0 0 0 1 0 0 0 0 0 0 0 0 0 7 0 0 0 0 0 0 0 0 0 0 0 0 0 0 0 0 0 0 0 0 0 0 0 0 4 0 0 1 0 5 0 2 0 1 0 0 0 0 2 0 0 0 0 "D_0__Eukaryota; D_1__Opisthokonta; D_2__Nucletmycea; D_3__Fungi; D_4__Glomeromycota; D_5__Incertae Sedis; D_6__Glomeromycetes; D_7_…
VTX00026 "OTU1.21948907653543e+32" 0 0 0 0 0 0 0 0 1 2 0 0 0 1 1 0 1 0 0 0 47 402 0 0 0 0 0 0 1 0 0 0 2 0 0 0 0 1 0 16 113 58 52 302 23 83 52 119 123 300 384 5 509 40 478 109 372 566 58 9 57 210 303 69 847 111 181 196 40 3 19 612 178 224 0 37 14 19 62 0 83 77 293 152 0 40 749 91 78 7 235 193 64 57 26 44 19 143 76 98 622 2 76 199 1 104 816 0 120 120 29 1088 378 45 12 135 "D_0__Eukaryota; D_1__Opis…
VTX00026 "OTU3.65581978040996e+32" 0 0 0 0 0 0 0 0 0 0 0 1 0 0 0 0 0 0 0 0 0 0 0 0 0 0 0 0 0 0 0 0 0 0 0 0 0 0 0 0 0 0 3 3 0 0 0 2 16 0 0 0 6 1 0 6 0 0 0 0 1 0 3 0 0 0 0 1 0 0 0 0 44 1 0 0 5 0 0 0 0 0 0 0 0 0 0 0 0 0 0 0 0 0 0 0 0 0 0 0 2 4 2 0 1 0 3 0 8 1 3 33 0 2 3 0 "D_0__Eukaryota; D_1__Opisthokonta; D_2__Nucletmycea; D_3__Fungi; D_4__Glomeromycota; D_5__Incertae Sedis; D_6__Glomeromycetes; D…
VTX00026 "OTU9.05267788270549e+31" 0 0 0 0 1 0 0 0 0 0 0 0 0 0 0 0 0 0 0 0 0 0 0 0 0 0 0 0 0 0 0 0 0 0 0 0 0 0 0 0 3 0 0 24 1 0 0 10 0 1 0 4 0 6 10 3 0 7 10 0 6 13 13 7 0 3 0 1 0 0 0 5 19 32 0 2 0 0 2 0 0 5 4 7 0 0 1 0 2 2 1 1 0 0 0 0 0 13 4 0 0 0 0 0 0 1 5 0 0 23 19 25 19 0 0 3 "D_0__Eukaryota; D_1__Opisthokonta; D_2__Nucletmycea; D_3__Fungi; D_4__Glomeromycota; D_5__Incertae Sedis; D_6__Glomero…
VTX00026 "OTU2.62833775425353e+32" 0 0 0 0 1 0 0 0 0 0 0 21 0 0 0 0 0 1 0 0 0 3 0 0 0 0 0 0 0 1 0 1 0 0 0 0 0 0 0 120 1 0 173 106 0 2 6 233 919 12 12 0 1043 5 0 215 6 4 1 1 28 77 341 0 2 0 7 16 2 0 0 4 1939 31 1 0 215 1 74 2 266 6 0 0 0 3 0 0 0 0 0 0 2 1 0 14 26 66 0 146 148 132 391 75 139 44 408 20 298 38 235 1262 44 20 457 229 "D_0__Eukaryota; D_1__Opisthokonta; D_2__Nucletmycea; D_3__Fungi; D_…
VTX00028 "OTU5.35849743823746e+30" 2 0 0 0 4 0 1 1 2 2 0 30782 0 0 0 1 0 0 0 1 0 0 1 0 0 0 0 1 1 0 0 0 3 3 0 0 0 2 2 2 0 3 2 1 0 0 0 0 4 1 0 0 2 39 2 0 1 2 3 1 0 0 5 0 8 2 3 0 0 4 1 3 5 2 2 1 898 0 1 4 10036 0 2 0 0 1 2 0 0 0 0 1 0 0 1 1 7764 1 0 95 36 27515 854 55 8 1351 3347 7 42 22 47 15 100 19811 6 2 "D_0__Eukaryota; D_1__Opisthokonta; D_2__Nucletmycea; D_3__Fungi; D_4__Glomeromycota; D_5__In…
VTX00028 "OTU1.51147575364796e+32" 0 0 0 0 0 0 0 0 0 0 0 2 0 0 0 0 0 0 0 0 0 0 0 2 0 2 0 0 0 0 0 0 0 0 0 0 0 0 0 0 0 0 0 0 0 0 0 0 2 0 0 0 0 6 0 0 0 0 0 0 0 0 2 0 0 0 0 0 0 0 0 1 0 0 0 0 21 0 0 2 1 0 0 0 0 0 0 0 0 0 0 0 0 0 0 0 14 0 0 7 0 5 7 5 1 2 7 0 6 1 29 2 4 18 0 0 "D_0__Eukaryota; D_1__Opisthokonta; D_2__Nucletmycea; D_3__Fungi; D_4__Glomeromycota; D_5__Incertae Sedis; D_6__Glomeromycetes; …
VTX00030 "OTU9.38245663638718e+32" 0 0 0 1 4 0 1 0 2 0 0 1 0 0 0 1 0 0 0 0 0 0 0 5 0 0 0 0 0 0 0 0 0 0 0 0 3 0 0 0 0 0 0 0 0 0 0 0 5 0 0 0 0 38 0 0 0 0 0 0 0 0 7 0 1 0 0 0 0 0 0 5 8 0 0 0 6 0 3 2 4 0 4 0 0 0 0 0 0 0 0 3 0 0 0 0 3 0 0 14 1 0 15 14 8 0 4 0 49 26 17 10 5 2 1 0 "D_0__Eukaryota; D_1__Opisthokonta; D_2__Nucletmycea; D_3__Fungi; D_4__Glomeromycota; D_5__Incertae Sedis; D_6__Glomeromycet…
VTX00030 "OTU3.65904549495191e+32" 0 0 0 0 0 0 0 0 0 0 0 0 0 0 0 0 0 0 0 0 1 31 0 0 0 0 0 0 0 0 0 0 0 0 0 0 0 0 0 0 4 0 0 39 4 70 11 2 4 11 14 0 0 0 0 0 21 62 0 1 5 0 173 0 0 0 2 0 1 0 0 2 1378 5 0 1 11 0 1 0 0 40 0 0 0 0 0 0 0 0 0 0 0 2 0 13 0 0 1 19 7 0 1 0 0 0 0 0 2 0 0 0 0 0 0 9 "D_0__Eukaryota; D_1__Opisthokonta; D_2__Nucletmycea; D_3__Fungi; D_4__Glomeromycota; D_5__Incertae Sedis; D_6__Glo…
VTX00030 "OTU1.04588105421101e+32" 0 0 0 1 2 0 0 3 1 0 0 0 0 0 0 0 0 0 0 1 0 0 0 11 0 2 2 2 0 0 0 1 0 0 0 0 7 0 0 0 0 0 0 0 0 0 0 0 0 0 0 0 0 3 0 0 0 0 0 0 0 0 0 0 0 0 0 0 0 0 0 0 0 0 0 0 0 0 0 1 0 0 1 0 0 0 0 0 0 0 0 0 0 0 0 0 1 0 0 0 0 0 2 4 0 1 2 0 10 9 3 3 2 0 0 0 "D_0__Eukaryota; D_1__Opisthokonta; D_2__Nucletmycea; D_3__Fungi; D_4__Glomeromycota; D_5__Incertae Sedis; D_6__Glomeromycetes; D_…
VTX00030 "OTU2.1624667656063e+32" 0 0 0 0 0 0 20 14 0 0 0 0 0 0 0 0 0 0 0 0 0 0 0 1 0 0 0 0 0 0 0 0 0 0 0 0 0 0 0 0 0 0 0 0 0 0 0 0 1 0 0 0 0 1 0 0 0 0 0 0 0 0 2 0 1 0 0 0 0 0 0 0 1 0 0 0 3 0 0 1 0 0 0 0 0 0 0 0 0 0 0 0 0 0 0 0 2 0 0 4 0 1 0 1 2 0 0 0 5 3 2 1 3 1 1 0 "D_0__Eukaryota; D_1__Opisthokonta; D_2__Nucletmycea; D_3__Fungi; D_4__Glomeromycota; D_5__Incertae Sedis; D_6__Glomeromycetes; D_7…
VTX00030 "OTU8.56072688412777e+32" 0 0 0 0 0 0 0 0 0 0 0 0 0 0 0 0 0 0 0 0 0 0 0 0 0 0 0 0 0 0 0 0 0 0 0 0 0 0 0 0 0 0 0 0 0 0 0 0 0 0 0 0 0 0 0 0 0 0 0 0 0 0 1 0 0 0 0 0 0 0 0 0 0 0 0 0 0 0 0 0 0 0 1 0 0 0 0 0 0 0 0 0 0 0 0 0 1 1 0 0 0 0 0 1 0 0 0 0 0 0 0 1 0 0 0 0 "D_0__Eukaryota; D_1__Opisthokonta; D_2__Nucletmycea; D_3__Fungi; D_4__Glomeromycota; D_5__Incertae Sedis; D_6__Glomeromycetes; D_7_…
VTX00030 "OTU1.87513722908314e+32" 0 0 0 0 0 0 0 0 2 0 0 0 0 0 0 8 0 0 0 0 0 0 0 21 0 0 0 0 0 0 0 0 0 0 2 0 0 0 0 0 0 0 0 0 0 0 0 0 0 0 0 0 0 81 0 0 0 0 0 0 0 0 0 0 0 0 0 0 0 0 0 14 0 0 0 0 2 0 4 0 0 0 11 0 0 0 0 0 0 0 0 3 0 0 0 0 0 0 0 1 0 0 0 0 0 0 0 0 0 0 0 0 0 0 0 0 "D_0__Eukaryota; D_1__Opisthokonta; D_2__Nucletmycea; D_3__Fungi; D_4__Glomeromycota; D_5__Incertae Sedis; D_6__Glomeromycetes; …
VTX00030 "OTU6.08734831815177e+32" 0 0 0 6 0 0 0 0 0 0 0 0 0 0 0 0 0 0 0 0 0 0 0 1 0 0 0 0 0 0 0 0 0 0 0 0 0 0 0 0 0 0 0 0 0 0 0 0 4 0 0 0 0 1 0 0 0 0 0 0 0 0 1 0 1 0 0 0 0 0 0 0 0 0 0 0 1 0 0 3 0 0 0 0 0 0 0 0 0 0 0 0 0 0 0 0 3 0 0 3 0 0 4 2 1 0 0 0 16 42 1 1 3 0 1 0 "D_0__Eukaryota; D_1__Opisthokonta; D_2__Nucletmycea; D_3__Fungi; D_4__Glomeromycota; D_5__Incertae Sedis; D_6__Glomeromycetes; D_…
VTX00030 "OTU8.563720508774e+32" 0 0 0 44 4 0 1 2 24 0 0 0 0 0 0 1 0 0 0 0 0 0 0 1 0 0 213 1 0 0 0 0 0 0 0 0 0 0 0 0 0 0 0 0 0 0 0 0 7 0 0 0 0 11 0 0 0 0 0 0 0 0 12 0 3 0 0 0 0 0 0 2 1 0 0 0 9 0 0 6 3 0 3 0 0 0 0 0 0 0 0 0 0 0 0 0 17 0 0 30 0 0 23 38 6 2 8 1 46 11 10 8 8 5 0 0 "D_0__Eukaryota; D_1__Opisthokonta; D_2__Nucletmycea; D_3__Fungi; D_4__Glomeromycota; D_5__Incertae Sedis; D_6__Glomeromy…
VTX00030 "OTU8.30922524063112e+32" 0 0 1 3 49 0 3 4 0 0 1 13 0 0 0 0 0 0 0 0 0 0 0 1 0 2 0 0 1 0 0 0 0 0 5 0 1 0 0 0 0 0 0 0 0 0 0 0 0 0 0 0 0 0 0 0 0 1 0 0 0 0 0 0 0 0 0 0 0 0 0 1 0 0 0 0 2 0 0 0 1 0 3 0 0 0 0 0 0 0 0 0 0 0 0 0 1 0 0 0 0 14 0 0 0 0 2 0 0 0 0 0 3 2 0 0 "D_0__Eukaryota; D_1__Opisthokonta; D_2__Nucletmycea; D_3__Fungi; D_4__Glomeromycota; D_5__Incertae Sedis; D_6__Glomeromycetes; D…
VTX00030 "OTU9.72345703198613e+32" 0 0 0 2 3 0 2 3 1 0 0 0 0 0 0 0 0 0 0 0 0 0 0 1 0 2 1 0 0 0 0 0 0 0 1 0 1 0 0 0 0 0 0 0 0 0 0 0 0 0 0 0 0 4 0 0 0 0 0 0 0 0 0 0 2 0 0 0 0 0 0 2 0 0 0 0 0 0 2 0 0 0 3 0 0 0 0 0 0 0 0 0 0 0 0 0 0 0 0 0 0 0 0 0 0 0 1 0 2 0 0 0 0 0 0 0 "D_0__Eukaryota; D_1__Opisthokonta; D_2__Nucletmycea; D_3__Fungi; D_4__Glomeromycota; D_5__Incertae Sedis; D_6__Glomeromycetes; D_7_…
VTX00030 "OTU1.54780019615224e+32" 0 24 0 0 23 0 0 0 0 0 0 1 0 0 0 0 0 0 0 0 0 0 0 1 0 0 0 0 0 0 1 0 0 0 46 0 0 0 0 0 0 0 0 1 0 0 0 0 5 0 0 0 0 1 1 0 0 0 0 0 0 0 3 0 1 0 0 1 0 0 0 4 2 0 0 0 1 0 1 0 0 0 1 0 0 0 0 0 0 0 0 1 0 0 0 0 8 0 0 11 1 0 6 13 3 0 7 0 14 4 6 12 9 2 1 0 "D_0__Eukaryota; D_1__Opisthokonta; D_2__Nucletmycea; D_3__Fungi; D_4__Glomeromycota; D_5__Incertae Sedis; D_6__Glomeromycete…
VTX00030 "OTU9.61440030324013e+32" 0 0 0 0 0 0 0 0 0 0 0 14 0 0 0 0 0 0 0 0 0 0 0 0 0 0 0 0 0 0 0 0 0 0 0 0 0 0 0 0 0 0 0 0 0 0 0 0 0 0 0 0 0 0 0 0 0 0 0 0 0 0 0 0 0 0 0 0 0 0 0 0 0 0 0 0 1 0 0 0 6 0 0 0 0 0 0 0 0 0 0 0 0 0 0 0 11 0 0 0 0 13 2 0 0 1 5 0 0 0 0 0 0 16 0 0 "D_0__Eukaryota; D_1__Opisthokonta; D_2__Nucletmycea; D_3__Fungi; D_4__Glomeromycota; D_5__Incertae Sedis; D_6__Glomeromycetes; …
VTX00030 "OTU5.90436551179938e+32" 0 0 0 0 0 0 0 0 0 0 0 0 0 0 0 0 0 0 0 0 0 0 0 3 0 0 0 0 0 0 0 0 0 0 0 0 0 0 0 0 0 0 0 0 0 0 0 0 0 0 0 0 0 8 0 0 0 0 0 0 0 0 0 0 0 0 0 0 0 0 0 4 0 0 0 0 0 0 0 0 0 0 7 0 0 0 0 0 0 0 0 0 0 0 0 0 0 0 0 0 0 0 0 0 0 0 0 0 0 0 0 0 0 0 0 0 "D_0__Eukaryota; D_1__Opisthokonta; D_2__Nucletmycea; D_3__Fungi; D_4__Glomeromycota; D_5__Incertae Sedis; D_6__Glomeromycetes; D_7_…
VTX00030 "OTU4.93405443325621e+31" 0 32 41 179 1135 2 200 309 257 12 7 416 0 36 2 167 11 1 1 0 2 1 4 848 1 114 106 45 9 1 8 38 2 0 189 1 397 1 1 2 0 1 0 2 0 2 2 3 2075 0 18 2 1 3657 0 1 0 139 0 2 1 3 2125 0 663 2 3 0 3 1 1 1388 1827 0 2 0 2576 3 244 1672 703 0 819 3 1 5 3 3 1 1 0 149 1 24 1 0 6735 0 0 7838 296 181 6600 16469 3208 973 3781 196 17218 4122 5964 3066 5476 3076 207 0 "D_0__Eukaryota; …
VTX00030 "OTU5.74598446188762e+32" 0 0 0 2 1 0 2 4 0 0 0 0 0 0 0 0 0 0 0 0 0 0 0 0 0 2 0 0 0 0 0 0 0 0 4 0 1 0 0 0 0 0 0 0 0 0 0 0 0 0 0 0 0 0 0 0 0 0 0 0 0 0 0 0 0 0 0 0 0 0 0 1 0 0 0 0 0 0 0 0 0 0 1 0 0 0 0 0 0 0 0 0 0 0 0 0 0 0 0 0 0 0 0 1 0 0 0 0 1 0 0 0 0 0 0 0 "D_0__Eukaryota; D_1__Opisthokonta; D_2__Nucletmycea; D_3__Fungi; D_4__Glomeromycota; D_5__Incertae Sedis; D_6__Glomeromycetes; D_7_…
VTX00030 "OTU3.10582228998186e+32" 0 0 0 0 0 0 0 0 0 0 0 0 0 0 0 0 0 0 0 0 0 0 0 0 0 0 0 0 0 0 0 0 0 0 0 0 0 0 0 0 0 0 0 0 0 0 0 0 0 0 0 0 0 3 0 0 0 0 0 0 0 0 0 0 0 0 0 0 0 0 0 1 0 0 0 0 2 0 0 2 0 0 0 0 0 0 0 0 0 0 0 0 0 0 0 0 3 0 0 4 0 0 2 6 2 0 2 0 8 2 5 2 0 0 0 0 "D_0__Eukaryota; D_1__Opisthokonta; D_2__Nucletmycea; D_3__Fungi; D_4__Glomeromycota; D_5__Incertae Sedis; D_6__Glomeromycetes; D_7_…
VTX00030 "OTU7.45328420956518e+32" 0 0 0 0 0 0 0 0 0 0 0 0 0 0 0 0 0 0 0 0 0 0 0 1 0 0 0 0 0 0 0 1 0 0 0 0 1 0 0 0 0 0 0 0 0 0 0 0 0 0 0 0 0 0 0 0 0 0 0 0 0 0 0 0 0 0 0 0 0 0 0 0 0 0 0 0 0 0 0 0 0 0 0 0 0 0 0 0 0 0 0 0 0 0 0 0 0 0 0 0 0 0 0 0 0 0 0 0 0 0 0 0 0 0 0 0 "D_0__Eukaryota; D_1__Opisthokonta; D_2__Nucletmycea; D_3__Fungi; D_4__Glomeromycota; D_5__Incertae Sedis; D_6__Glomeromycetes; D_7_…
VTX00030 "OTU2.96044425975815e+32" 0 0 0 0 0 0 0 1 0 0 0 0 0 0 0 0 0 0 0 0 0 0 0 0 0 0 1 0 0 0 0 0 0 0 0 0 0 0 0 0 0 0 0 0 0 0 0 0 0 0 0 0 0 0 0 0 0 0 0 0 0 0 0 0 0 0 0 0 0 0 0 0 0 0 0 0 0 0 0 0 0 0 0 0 0 0 0 0 0 0 0 0 0 0 0 0 0 0 0 0 0 0 0 0 0 0 0 0 0 0 0 0 0 0 0 0 "D_0__Eukaryota; D_1__Opisthokonta; D_2__Nucletmycea; D_3__Fungi; D_4__Glomeromycota; D_5__Incertae Sedis; D_6__Glomeromycetes; D_7_…
VTX00030 "OTU8.58340716041201e+32" 0 0 0 0 0 0 0 0 0 0 0 0 0 0 0 0 0 0 0 0 0 0 0 7 0 0 0 0 0 0 0 0 0 0 0 0 0 0 0 0 0 0 0 0 0 0 0 0 0 0 0 0 0 0 0 0 0 0 0 0 0 0 0 0 0 0 0 0 0 0 0 0 0 0 0 0 0 0 0 0 0 0 0 0 0 0 0 0 0 0 0 0 0 0 0 0 0 0 0 0 0 0 0 0 0 0 0 0 0 0 0 0 0 0 0 0 "D_0__Eukaryota; D_1__Opisthokonta; D_2__Nucletmycea; D_3__Fungi; D_4__Glomeromycota; D_5__Incertae Sedis; D_6__Glomeromycetes; D_7_…
VTX00030 "OTU6.89193432664112e+32" 0 0 0 0 1 0 0 1 103 0 0 1 0 2 0 140 0 0 0 0 0 0 0 436 0 1 3 1 0 1 0 0 0 0 2 0 2 0 0 0 0 0 0 0 0 0 0 0 11 0 0 0 0 1087 0 0 0 0 0 0 0 0 7 0 0 0 0 0 0 0 0 455 5 0 0 0 8 0 97 4 2 0 289 0 0 0 0 0 0 0 0 0 0 0 0 0 25 0 0 17 2 2 27 81 10 1 12 0 79 11 17 4 19 17 0 0 "D_0__Eukaryota; D_1__Opisthokonta; D_2__Nucletmycea; D_3__Fungi; D_4__Glomeromycota; D_5__Incertae Sedis;…
VTX00030 "OTU2.14083403172868e+32" 0 0 0 0 5 0 2 1 0 0 0 0 0 0 0 0 1 0 0 0 0 0 0 2 0 0 2 0 0 0 0 0 0 0 0 0 3 0 0 0 0 0 0 0 0 0 0 0 0 0 0 0 0 0 0 0 0 0 0 0 0 0 1 0 0 0 0 0 0 0 0 0 0 0 0 0 0 0 0 0 0 0 0 0 0 0 0 0 0 0 0 0 0 0 0 0 0 0 0 0 0 0 0 0 0 0 1 0 0 0 0 0 0 0 0 0 "D_0__Eukaryota; D_1__Opisthokonta; D_2__Nucletmycea; D_3__Fungi; D_4__Glomeromycota; D_5__Incertae Sedis; D_6__Glomeromycetes; D_7_…
VTX00039 "OTU6.82097501754786e+32" 0 0 0 0 0 0 0 0 0 0 0 0 0 0 0 0 0 0 0 0 0 0 0 0 0 0 1 0 0 0 0 0 0 0 0 0 0 0 0 0 0 0 0 0 0 0 0 0 0 0 0 0 15 0 0 0 0 0 0 0 0 0 4 0 0 0 0 0 0 0 0 0 9 0 0 0 4 0 0 0 0 0 0 0 0 0 0 0 0 0 0 0 0 0 0 0 9 0 0 9 14 3 8 0 0 8 5 14 19 0 25 4 0 12 19 0 "D_0__Eukaryota; D_1__Opisthokonta; D_2__Nucletmycea; D_3__Fungi; D_4__Glomeromycota; D_5__Incertae Sedis; D_6__Glomeromycete…
VTX00041 "OTU8.72767776413177e+31" 0 0 0 1 0 5 0 1 0 0 0 0 0 0 0 0 0 0 0 0 0 0 0 0 0 0 0 0 0 0 0 0 0 0 0 1 0 0 0 0 0 0 0 0 0 0 0 0 0 0 0 0 0 0 0 0 0 0 0 0 0 0 0 0 0 0 0 0 0 0 0 0 0 0 0 0 0 0 0 0 0 0 0 0 0 0 0 0 0 0 0 0 0 0 0 0 0 0 0 0 1 0 0 0 0 0 10 0 0 0 0 0 0 0 0 0 "D_0__Eukaryota; D_1__Opisthokonta; D_2__Nucletmycea; D_3__Fungi; D_4__Glomeromycota; D_5__Incertae Sedis; D_6__Glomeromycetes; D_7…
VTX00041 "OTU2.39478154720896e+32" 0 0 0 81 0 0 0 63 0 0 0 0 0 0 0 0 0 0 0 0 0 0 0 0 0 0 0 4 0 0 1 0 0 0 0 1 0 0 0 0 0 0 0 0 0 0 0 0 0 0 0 0 0 0 0 0 0 0 0 0 0 0 0 0 0 0 0 0 0 0 0 0 0 0 0 0 0 0 0 0 0 0 0 0 0 0 0 0 0 0 0 0 0 0 0 0 0 0 0 28 1 0 1 0 0 0 0 0 1 0 0 0 0 0 1 0 "D_0__Eukaryota; D_1__Opisthokonta; D_2__Nucletmycea; D_3__Fungi; D_4__Glomeromycota; D_5__Incertae Sedis; D_6__Glomeromycetes; D…
VTX00049 "OTU7.18097045858592e+32" 0 0 0 0 0 0 0 0 0 0 0 0 0 0 0 0 0 0 0 0 0 0 0 0 0 0 0 0 0 0 0 0 0 0 0 0 0 0 0 0 0 0 0 0 0 0 0 0 0 0 0 0 0 0 0 0 0 0 0 0 0 0 1 0 0 0 0 0 0 0 0 0 0 0 0 0 0 0 0 0 0 0 0 0 0 0 0 0 0 0 0 0 0 0 0 0 1 0 0 0 1 0 2 0 0 0 0 1 0 0 1 0 0 0 3 0 "D_0__Eukaryota; D_1__Opisthokonta; D_2__Nucletmycea; D_3__Fungi; D_4__Glomeromycota; D_5__Incertae Sedis; D_6__Glomeromycetes; D_7_…
VTX00049 "OTU7.02039254210142e+32" 5 1 0 0 0 2 0 0 0 0 0 0 0 0 0 0 0 0 0 0 0 0 0 0 0 0 13 0 0 0 0 0 0 0 0 60 0 0 0 0 0 0 0 0 0 0 0 0 0 0 0 0 0 0 0 0 0 0 0 0 0 0 0 0 0 0 0 0 0 0 0 0 0 0 0 0 6 0 0 0 0 0 0 0 0 0 0 0 0 0 0 0 0 0 0 0 0 0 0 0 0 1 0 0 0 0 0 0 0 0 0 0 12 0 0 0 "D_0__Eukaryota; D_1__Opisthokonta; D_2__Nucletmycea; D_3__Fungi; D_4__Glomeromycota; D_5__Incertae Sedis; D_6__Glomeromycetes; D…
VTX00049 "OTU7.19369502434812e+32" 0 0 0 0 0 0 0 0 0 0 0 0 0 0 0 0 0 0 0 0 0 0 0 0 0 0 1 0 0 0 0 0 0 0 0 5 0 0 0 0 0 0 0 0 0 0 0 0 0 0 0 0 3 0 0 0 0 0 0 0 0 0 1 0 0 0 0 0 0 0 0 0 0 0 0 0 1 0 0 0 1 0 0 0 0 0 0 0 0 0 0 0 0 0 0 0 1 0 0 0 15 17 2 0 0 1 0 1 0 0 1 14 94 1 370 0 "D_0__Eukaryota; D_1__Opisthokonta; D_2__Nucletmycea; D_3__Fungi; D_4__Glomeromycota; D_5__Incertae Sedis; D_6__Glomeromycetes…
VTX00049 "OTU2.04275761813985e+32" 0 0 0 0 0 0 0 0 0 0 0 0 0 0 0 0 0 0 0 0 0 0 0 0 0 0 0 0 0 0 0 0 0 0 0 0 0 0 0 0 0 0 0 0 0 0 0 0 0 0 0 0 0 0 0 0 0 0 0 0 0 0 0 0 0 0 0 0 0 0 0 0 0 0 0 0 0 0 0 0 0 0 0 0 0 0 0 0 0 0 0 0 0 0 0 0 0 0 0 0 0 14 0 0 0 0 0 0 0 0 0 97 44 0 1 0 "D_0__Eukaryota; D_1__Opisthokonta; D_2__Nucletmycea; D_3__Fungi; D_4__Glomeromycota; D_5__Incertae Sedis; D_6__Glomeromycetes; D…
VTX00049 "OTU1.51030015511651e+32" 1 0 0 0 0 0 0 0 0 0 0 0 0 0 0 0 0 0 0 0 0 0 0 0 0 0 3 0 0 0 0 0 0 0 0 3 0 0 0 0 0 0 0 0 0 0 0 0 0 0 0 0 0 0 0 0 0 0 0 0 0 0 0 0 0 0 0 0 0 0 0 0 0 0 0 0 1 0 0 0 0 0 0 0 0 0 0 0 0 0 0 0 0 0 0 0 0 0 0 0 0 0 0 0 0 0 0 0 0 0 0 0 0 0 1 0 "D_0__Eukaryota; D_1__Opisthokonta; D_2__Nucletmycea; D_3__Fungi; D_4__Glomeromycota; D_5__Incertae Sedis; D_6__Glomeromycetes; D_7_…
VTX00052 "OTU4.85480702857306e+32" 0 0 0 0 0 2 0 0 0 0 0 0 0 0 0 0 0 0 0 0 0 0 0 0 0 0 13 0 0 0 0 0 0 0 0 4 0 0 0 0 0 0 0 0 0 0 0 0 0 0 0 0 0 0 0 0 0 0 0 0 0 0 0 0 0 0 0 0 0 0 0 0 0 0 0 0 0 0 0 0 2 0 0 0 0 0 0 0 0 0 0 0 0 0 0 0 1 0 0 3 1 36 0 0 0 0 1 0 0 0 0 0 34 0 0 0 "D_0__Eukaryota; D_1__Opisthokonta; D_2__Nucletmycea; D_3__Fungi; D_4__Glomeromycota; D_5__Incertae Sedis; D_6__Glomeromycetes; D…
VTX00052 "OTU7.08066917290189e+32" 0 39 9 0 0 0 0 11 0 0 0 0 0 0 0 0 0 1 0 0 0 0 0 0 0 0 71 0 0 0 9 0 0 50 36 0 0 0 0 0 0 0 0 0 0 0 0 0 0 0 0 0 0 0 0 0 0 0 0 0 0 0 0 0 0 0 0 0 0 0 0 0 0 0 0 0 0 0 0 0 0 0 0 0 0 0 0 0 0 0 0 0 0 0 0 0 0 0 0 0 0 0 0 0 0 0 0 0 0 0 0 0 0 0 0 0 "D_0__Eukaryota; D_1__Opisthokonta; D_2__Nucletmycea; D_3__Fungi; D_4__Glomeromycota; D_5__Incertae Sedis; D_6__Glomeromycetes;…
VTX00054 "OTU2.62777333550485e+32" 0 0 0 0 0 0 0 0 0 0 0 0 0 0 0 0 0 0 0 0 0 0 1 0 0 0 0 0 0 0 0 0 0 0 0 0 0 0 0 0 0 0 0 0 0 0 0 0 0 0 0 0 0 0 1 0 0 0 0 0 0 0 0 0 0 0 0 0 0 0 0 0 0 0 0 0 0 0 0 0 0 0 0 5 0 0 0 0 0 0 0 0 0 0 0 0 0 0 0 0 0 0 0 0 0 0 0 0 0 0 0 0 0 0 0 0 "D_0__Eukaryota; D_1__Opisthokonta; D_2__Nucletmycea; D_3__Fungi; D_4__Glomeromycota; D_5__Incertae Sedis; D_6__Glomeromycetes; D_7_…
VTX00054 "OTU6.46547802891028e+32" 1 0 0 3 1 0 1 3 8 0 0 0 2 0 0 2 0 0 0 0 1 9 0 1 0 0 4 3 0 5 0 0 1 1 0 1 11 0 2 26 3 5 3 7 0 1 1 3 0 1 0 0 0 2 2 2 2 3 0 14 2 6 0 0 0 7 9 0 0 2 8 12 42 3 10 2 0 14 3 0 0 6 7 1 3 20 2 16 0 2 0 7 2 0 10 0 0 3 2 0 0 9 0 0 0 0 0 0 0 0 0 0 0 61 0 0 "D_0__Eukaryota; D_1__Opisthokonta; D_2__Nucletmycea; D_3__Fungi; D_4__Glomeromycota; D_5__Incertae Sedis; D_6__Glomeromy…
VTX00054 "OTU9.0583438115933e+32" 0 0 0 0 0 0 0 0 1 1 0 0 0 0 0 0 0 0 0 0 0 0 0 0 0 0 0 0 0 0 0 0 0 0 0 0 0 0 0 0 1 0 0 0 0 0 0 0 0 0 0 0 0 0 13 0 0 0 0 1 0 0 0 0 10 0 0 0 0 0 0 0 0 0 0 0 0 0 0 0 0 0 1 1 0 0 0 1 0 0 0 0 0 0 0 0 0 0 0 0 0 0 0 0 0 0 0 0 0 0 0 0 0 0 0 0 "D_0__Eukaryota; D_1__Opisthokonta; D_2__Nucletmycea; D_3__Fungi; D_4__Glomeromycota; D_5__Incertae Sedis; D_6__Glomeromycetes; D_7…
VTX00055 "OTU7.39778993878417e+32" 0 0 0 0 0 0 0 0 0 0 0 0 0 0 0 0 0 0 0 0 0 0 0 0 0 0 0 0 0 0 0 0 0 0 0 0 0 0 0 0 0 0 0 0 0 0 0 0 0 0 0 0 0 0 0 0 0 0 0 0 0 0 0 0 0 0 0 0 0 0 0 0 228 0 0 0 119 0 0 0 0 0 0 0 0 0 0 0 0 0 0 0 0 0 0 0 0 0 0 75 25 4 0 0 0 0 0 0 0 0 0 0 0 0 0 0 "D_0__Eukaryota; D_1__Opisthokonta; D_2__Nucletmycea; D_3__Fungi; D_4__Glomeromycota; D_5__Incertae Sedis; D_6__Glomeromycetes…
VTX00056 "OTU2.31651091506613e+32" 0 5 293 33 23 27 57 53 371 13 22 0 0 1 26 15 2 0 11 0 0 0 0 194 1 49 1706 247 0 255 43 27 0 107 37 0 107 45 81 0 0 0 0 1 0 0 0 0 0 0 0 0 0 0 0 0 0 0 0 0 0 0 0 0 0 1 0 0 0 0 0 0 1 1 0 0 0 0 0 0 0 0 0 0 0 0 0 0 0 0 0 0 0 0 0 0 0 0 0 0 0 1 0 0 0 0 0 0 0 0 0 0 0 0 0 0 "D_0__Eukaryota; D_1__Opisthokonta; D_2__Nucletmycea; D_3__Fungi; D_4__Glomeromycota; D_5__Incertae…
VTX00056 "OTU7.38610844247496e+32" 0 0 0 0 0 7 9 1 0 0 0 0 0 0 0 0 0 0 0 14 0 0 0 1 0 0 0 0 0 0 1 0 0 0 14 0 0 0 0 0 0 1 0 0 0 0 0 0 0 0 0 0 0 0 0 0 1 0 0 0 0 0 0 0 0 0 0 25 0 0 0 0 0 0 0 0 84 0 0 0 0 0 0 0 0 0 0 0 0 1 0 0 0 0 0 1746 0 0 0 2 1 0 0 0 1 0 80 0 264 0 1 95 0 0 1 0 "D_0__Eukaryota; D_1__Opisthokonta; D_2__Nucletmycea; D_3__Fungi; D_4__Glomeromycota; D_5__Incertae Sedis; D_6__Glomeromy…
VTX00056 "OTU1.15950540130907e+32" 0 0 2 0 0 0 1 0 2 0 0 0 0 0 2 0 0 0 2 0 0 0 0 0 0 0 17 3 0 2 0 0 0 0 0 0 0 0 2 0 0 0 0 0 0 0 0 0 0 0 0 0 0 0 0 0 0 0 0 0 0 0 0 0 0 0 0 0 0 0 0 0 0 0 0 0 0 0 0 0 0 0 0 0 0 0 0 0 0 0 0 0 0 0 0 0 0 0 0 0 0 0 0 0 0 0 0 0 0 0 0 0 0 0 0 0 "D_0__Eukaryota; D_1__Opisthokonta; D_2__Nucletmycea; D_3__Fungi; D_4__Glomeromycota; D_5__Incertae Sedis; D_6__Glomeromycetes; D_7…
VTX00056 "OTU5.73131565096897e+32" 0 0 0 20 0 144 0 0 6 0 90 0 0 0 0 0 20 0 0 0 0 0 0 0 0 0 28 0 0 3 0 0 0 22 0 0 0 0 0 0 0 0 0 0 0 0 0 0 0 0 0 0 0 0 0 0 0 0 0 0 0 0 0 0 0 0 0 0 0 0 0 0 0 0 0 0 0 0 0 0 0 0 0 0 0 0 0 0 0 0 0 0 0 0 0 0 0 0 0 5 0 0 0 0 0 0 0 0 0 0 0 0 0 0 0 0 "D_0__Eukaryota; D_1__Opisthokonta; D_2__Nucletmycea; D_3__Fungi; D_4__Glomeromycota; D_5__Incertae Sedis; D_6__Glomeromycete…
VTX00056 "OTU1.94113848089135e+32" 0 0 0 0 0 0 0 0 0 0 0 0 0 0 0 0 0 0 0 0 0 0 0 0 0 0 0 0 0 0 0 0 0 0 0 0 0 0 0 0 0 0 0 0 0 0 0 0 0 0 0 0 0 0 0 0 0 0 0 0 0 0 0 0 0 0 0 0 0 0 0 0 0 0 0 0 0 0 0 0 0 0 0 0 0 0 0 0 0 0 0 0 0 0 0 4 0 0 0 0 0 0 0 0 0 0 4 0 6 0 0 1 0 0 0 0 "D_0__Eukaryota; D_1__Opisthokonta; D_2__Nucletmycea; D_3__Fungi; D_4__Glomeromycota; D_5__Incertae Sedis; D_6__Glomeromycetes; D_7_…
VTX00056 "OTU6.38747115865179e+32" 0 0 0 0 0 0 0 0 0 0 0 0 0 0 0 0 0 0 0 0 0 0 0 0 0 0 2 0 0 0 0 0 0 0 0 0 0 0 0 0 0 0 0 0 0 0 0 0 0 0 0 0 0 0 0 0 0 0 0 0 0 0 0 0 0 0 0 0 0 0 0 0 0 0 0 0 0 0 0 0 0 0 0 0 0 0 0 0 0 0 0 0 0 0 0 0 0 0 0 0 0 0 0 0 0 0 0 0 0 0 0 0 0 0 0 0 "D_0__Eukaryota; D_1__Opisthokonta; D_2__Nucletmycea; D_3__Fungi; D_4__Glomeromycota; D_5__Incertae Sedis; D_6__Glomeromycetes; D_7_…
VTX00056 "OTU7.14293212646158e+32" 0 1 3 0 0 3 3 1 0 3 0 0 1 0 0 0 0 0 0 0 0 0 0 21 0 0 0 1 0 0 0 0 0 0 0 0 0 0 0 0 0 0 0 0 0 0 0 0 0 0 0 0 0 0 0 0 0 0 0 0 0 0 0 0 0 0 0 0 0 0 0 0 0 0 0 0 0 0 0 0 0 0 0 0 0 0 0 0 0 0 0 0 0 0 0 0 0 0 0 0 0 0 0 0 0 0 0 0 0 0 0 0 0 0 0 0 "D_0__Eukaryota; D_1__Opisthokonta; D_2__Nucletmycea; D_3__Fungi; D_4__Glomeromycota; D_5__Incertae Sedis; D_6__Glomeromycetes; D_7…
VTX00056 "OTU4.8860871679183e+32" 0 0 0 0 0 0 0 0 0 0 1 0 0 0 0 0 0 0 0 0 0 0 0 0 0 0 3 0 0 0 0 0 0 1 0 0 0 0 0 0 0 0 0 0 0 0 0 0 0 0 0 0 0 0 0 0 0 0 0 0 0 0 0 0 0 0 0 0 0 0 0 0 0 0 0 0 0 0 0 0 0 0 0 0 0 0 0 0 0 0 0 0 0 0 0 0 0 0 0 2 0 0 0 0 0 0 0 0 0 0 0 0 0 0 0 0 "D_0__Eukaryota; D_1__Opisthokonta; D_2__Nucletmycea; D_3__Fungi; D_4__Glomeromycota; D_5__Incertae Sedis; D_6__Glomeromycetes; D_7__…
VTX00056 "OTU7.85154905284756e+32" 0 0 0 0 0 0 0 0 0 0 0 0 0 0 0 0 0 0 0 0 0 0 0 0 0 0 0 0 0 0 0 0 0 0 0 0 0 0 0 0 0 0 0 0 0 0 0 0 0 0 0 0 0 0 0 0 0 0 0 0 0 0 0 0 0 0 0 0 0 0 0 0 0 0 0 0 1 0 0 0 0 0 0 0 0 0 0 0 0 0 0 0 0 0 0 4 0 0 0 0 0 0 0 0 0 0 0 0 0 1 0 2 0 0 0 0 "D_0__Eukaryota; D_1__Opisthokonta; D_2__Nucletmycea; D_3__Fungi; D_4__Glomeromycota; D_5__Incertae Sedis; D_6__Glomeromycetes; D_7_…
VTX00056 "OTU1.42847243670019e+30" 0 0 0 0 0 0 0 0 0 0 0 0 0 0 0 0 0 0 0 0 0 0 0 1 0 0 1 2 0 0 0 0 0 0 0 0 0 0 2 0 0 0 0 0 0 0 0 0 0 0 0 0 0 0 0 0 0 0 0 0 0 0 0 0 0 0 0 0 0 0 0 0 0 0 0 0 0 0 0 0 0 0 0 0 0 0 0 0 0 0 0 0 0 0 0 0 0 0 0 0 0 0 0 0 0 0 0 0 0 0 0 0 0 0 0 0 "D_0__Eukaryota; D_1__Opisthokonta; D_2__Nucletmycea; D_3__Fungi; D_4__Glomeromycota; D_5__Incertae Sedis; D_6__Glomeromycetes; D_7_…
VTX00056 "OTU4.69807281816781e+32" 19 41 1255 162 64 3 504 262 32 1 25 0 0 60 89 1 6 0 33 4 0 0 30 47 74 128 7055 188 0 411 124 1 38 3 7 3 75 5 90 0 0 0 0 0 0 0 0 0 0 0 1 0 0 0 0 0 0 0 0 0 0 1 0 1 0 0 0 0 0 0 0 0 0 0 0 0 0 0 1 0 1 0 0 0 0 1 0 0 0 0 1 1 0 0 0 1 0 0 0 0 4 0 0 1 0 0 0 0 0 0 1 0 0 0 0 0 "D_0__Eukaryota; D_1__Opisthokonta; D_2__Nucletmycea; D_3__Fungi; D_4__Glomeromycota; D_5__Incerta…
VTX00056 "OTU7.70927877164926e+32" 0 0 16 0 1 0 1 2 1 0 0 0 0 0 0 0 0 0 0 0 0 0 0 0 0 3 44 0 0 3 1 0 1 0 0 0 0 0 0 0 0 0 0 0 0 0 0 0 0 0 0 0 0 0 0 0 0 0 0 0 0 0 0 0 0 0 0 0 0 0 0 0 0 0 0 0 0 0 0 0 0 0 0 0 0 0 0 0 0 0 0 0 0 0 0 0 0 0 0 0 0 0 0 0 0 0 0 0 0 0 0 0 0 0 0 0 "D_0__Eukaryota; D_1__Opisthokonta; D_2__Nucletmycea; D_3__Fungi; D_4__Glomeromycota; D_5__Incertae Sedis; D_6__Glomeromycetes; D_…
VTX00057 "OTU8.36276523725122e+32" 0 0 0 0 5 2 1 1 0 2 0 0 0 0 0 0 1 0 1 3 2 0 0 17 1 5 4 2 1 10 1 0 0 0 3 0 1 1 0 1 0 2 0 0 0 2 0 0 0 1 0 6 2 3 0 0 0 0 0 1 5 1 0 0 0 0 0 0 0 0 0 0 0 0 0 0 0 1 0 0 0 0 9 7 0 0 0 0 0 0 0 20 0 0 1 0 0 4 0 2 0 0 0 1 0 0 0 1 1 0 0 0 0 0 2 0 "D_0__Eukaryota; D_1__Opisthokonta; D_2__Nucletmycea; D_3__Fungi; D_4__Glomeromycota; D_5__Incertae Sedis; D_6__Glomeromycetes; D…
VTX00057 "OTU2.18288128740223e+32" 0 0 1 1 30 15 12 28 4 17 2 0 1 1 0 0 6 0 0 7 12 1 0 66 1 18 16 2 0 93 2 0 0 0 40 2 10 1 2 0 5 11 0 1 3 10 0 0 0 17 2 55 9 8 4 8 1 10 1 1 35 3 1 0 1 6 3 0 0 1 4 0 0 3 1 8 0 0 1 0 2 6 62 18 0 6 0 4 2 0 1 76 0 4 23 0 0 9 2 33 0 0 0 3 2 1 2 1 3 0 2 2 3 0 17 3 "D_0__Eukaryota; D_1__Opisthokonta; D_2__Nucletmycea; D_3__Fungi; D_4__Glomeromycota; D_5__Incertae Sedis; D…
VTX00057 "OTU2.63032386076127e+32" 13 41 0 41 1229 240 141 442 6 304 89 0 0 73 0 0 82 0 0 102 0 0 52 2491 97 121 124 57 60 740 73 1 0 3 284 51 185 75 0 0 0 0 1 0 0 0 0 0 0 2 0 58 0 1 21 1 13 0 1 0 650 0 0 0 0 0 0 0 0 0 0 0 0 0 0 0 0 1 0 0 0 0 4 316 0 1 1 0 0 0 0 2 0 0 0 0 0 67 0 2 1 0 0 0 0 0 0 0 0 1 0 2 0 0 0 0 "D_0__Eukaryota; D_1__Opisthokonta; D_2__Nucletmycea; D_3__Fungi; D_4__Glomeromycota;…
VTX00057 "OTU2.86905633941533e+32" 0 0 0 0 1 2 3 4 1 2 0 0 0 0 0 0 0 0 0 2 4 0 0 3 0 2 4 0 0 9 1 0 0 0 8 1 1 0 0 0 2 0 0 0 1 1 0 1 0 0 0 0 2 0 1 4 0 1 0 0 7 2 0 0 0 2 0 0 0 2 2 0 0 0 0 4 0 0 1 0 1 2 2 0 0 0 0 1 0 1 2 5 0 1 1 3 0 1 1 0 0 0 0 1 1 1 0 0 0 0 0 0 0 0 2 1 "D_0__Eukaryota; D_1__Opisthokonta; D_2__Nucletmycea; D_3__Fungi; D_4__Glomeromycota; D_5__Incertae Sedis; D_6__Glomeromycetes; D_7_…
VTX00057 "OTU9.26852552515552e+32" 0 0 0 0 0 0 0 0 0 0 0 0 0 0 0 0 0 0 0 0 0 0 0 0 0 0 0 0 0 0 0 0 0 0 0 0 0 0 0 0 0 0 0 0 0 0 0 0 97 0 0 0 0 0 0 0 0 0 0 0 0 0 0 0 0 0 0 0 0 0 0 0 1 0 0 0 0 0 0 0 0 0 0 0 0 0 0 0 0 0 0 0 0 0 0 0 0 0 0 1 0 0 101 0 0 0 0 0 0 0 113 0 0 0 0 0 "D_0__Eukaryota; D_1__Opisthokonta; D_2__Nucletmycea; D_3__Fungi; D_4__Glomeromycota; D_5__Incertae Sedis; D_6__Glomeromycetes;…
VTX00060 "OTU7.43650479779717e+32" 0 0 0 0 1 0 1 0 6 0 0 0 2 0 0 1 0 0 1 0 2 6 0 1 0 0 6 1 0 4 0 0 0 0 0 1 0 0 1 0 0 6 0 4 0 4 2 0 0 0 0 2 0 4 8 0 1 0 0 1 7 0 0 0 0 4 0 0 1 1 4 0 0 0 2 1 0 1 0 0 0 0 23 6 0 0 0 9 2 1 1 13 0 0 1 0 0 5 0 0 3 0 0 0 0 0 0 0 0 0 0 0 0 0 0 0 "D_0__Eukaryota; D_1__Opisthokonta; D_2__Nucletmycea; D_3__Fungi; D_4__Glomeromycota; D_5__Incertae Sedis; D_6__Glomeromycetes; D_…
VTX00060 "OTU8.56570952778448e+32" 119 106 1 282 198 0 437 1 1523 584 0 0 1365 55 294 532 2 61 57 25 443 700 74 448 45 1 1511 1132 10 1251 105 5 551 7 1 244 1800 0 508 299 619 792 349 2572 13 459 223 165 0 18 264 1 1 379 220 41 307 606 0 249 613 439 0 0 1 955 37 0 157 199 1166 177 10 889 1089 85 0 621 367 0 1 82 1830 311 0 182 467 2599 637 238 193 1023 0 84 128 1 1 1012 404 67 8 3 1 0 0 0 0 0 1 1…
VTX00061 "OTU3.65681848770567e+32" 0 0 0 0 0 0 0 0 24 0 0 0 0 0 0 0 0 0 0 0 0 0 0 0 0 0 0 1 0 0 0 0 0 0 0 0 0 0 0 0 4 0 0 1 0 6 16 0 0 0 1 27 0 1 174 0 0 0 0 0 0 0 0 0 24 0 0 0 0 0 0 0 0 0 0 129 0 0 0 0 0 0 7 66 0 3 0 1 1 15 5 0 0 0 6 0 0 0 0 0 1 4 0 0 0 0 0 0 0 0 0 0 0 0 0 0 "D_0__Eukaryota; D_1__Opisthokonta; D_2__Nucletmycea; D_3__Fungi; D_4__Glomeromycota; D_5__Incertae Sedis; D_6__Glomeromyc…
VTX00061 "OTU5.25069764602073e+32" 0 0 0 0 0 0 0 0 1 0 0 0 0 0 0 0 0 0 0 0 0 0 0 0 0 0 0 0 0 0 0 0 0 0 0 0 0 0 0 0 0 0 0 0 0 0 1 0 0 0 0 0 0 0 6 0 0 0 0 0 0 0 0 0 0 0 0 0 0 0 0 0 0 0 0 4 0 0 0 0 0 0 0 1 0 0 0 0 0 0 0 0 0 0 0 0 0 0 0 0 0 0 0 0 0 0 0 0 0 0 0 0 0 0 0 0 "D_0__Eukaryota; D_1__Opisthokonta; D_2__Nucletmycea; D_3__Fungi; D_4__Glomeromycota; D_5__Incertae Sedis; D_6__Glomeromycetes; D_7_…
VTX00061 "OTU6.07427289170207e+32" 0 0 0 0 0 0 0 0 0 0 0 0 0 0 0 0 0 0 0 0 0 0 0 0 0 0 0 0 0 0 0 0 0 0 0 0 0 0 0 0 0 0 0 0 0 0 0 0 0 0 0 1 0 0 16 0 0 0 0 0 0 0 0 0 0 0 0 0 0 0 0 0 0 0 0 2 0 0 0 0 0 0 0 0 0 0 0 0 0 0 0 0 0 0 0 0 0 0 0 0 0 0 0 0 0 0 0 0 0 0 0 0 0 0 0 0 "D_0__Eukaryota; D_1__Opisthokonta; D_2__Nucletmycea; D_3__Fungi; D_4__Glomeromycota; D_5__Incertae Sedis; D_6__Glomeromycetes; D_7…
VTX00061 "OTU6.19315088813902e+32" 0 0 0 0 0 0 0 0 55 0 0 0 0 0 0 10 0 0 0 0 0 1 0 0 0 0 0 0 0 0 0 0 0 0 0 0 0 0 0 1 28 0 0 0 0 61 158 0 0 0 0 209 0 2 1336 2 0 26 0 2 0 1 0 0 0 2 0 0 0 0 0 2 1 0 1 1254 0 2 5 0 88 0 0 307 0 2 0 10 0 121 0 0 0 0 11 0 0 0 1 0 0 1 0 0 0 0 0 0 0 0 0 0 0 0 0 0 "D_0__Eukaryota; D_1__Opisthokonta; D_2__Nucletmycea; D_3__Fungi; D_4__Glomeromycota; D_5__Incertae Sedis; D_6…
VTX00061 "OTU5.78294618314821e+32" 0 1 1 0 0 0 0 0 596 0 0 0 0 1 0 2 0 0 0 0 0 1 0 0 0 0 0 20 0 0 0 0 0 0 0 0 0 0 0 0 67 0 0 8 0 57 290 0 0 0 0 438 0 3 3628 2 3 57 0 1 0 1 0 1 233 0 0 0 0 48 0 0 6 0 0 2571 0 0 0 0 198 0 18 1747 0 17 0 0 1 395 4 0 0 0 37 1 0 0 1 0 23 62 0 0 0 0 155 0 1 0 2 0 0 4 0 0 "D_0__Eukaryota; D_1__Opisthokonta; D_2__Nucletmycea; D_3__Fungi; D_4__Glomeromycota; D_5__Incertae…
VTX00062 "OTU5.92092025497376e+32" 0 0 0 1 0 0 0 0 0 0 0 0 0 0 0 0 0 0 0 0 0 0 0 0 0 0 0 0 0 0 0 0 2 0 0 0 0 0 0 29 9 1 0 3 0 1 6 0 0 0 0 0 0 1 0 2 0 2 0 17 0 4 0 0 0 3 4 0 2 1 0 0 0 0 15 2 0 4 4 0 0 3 0 0 0 27 2 7 0 0 0 0 0 0 4 0 0 0 4 0 0 0 0 0 0 0 0 0 0 0 0 0 0 0 0 0 "D_0__Eukaryota; D_1__Opisthokonta; D_2__Nucletmycea; D_3__Fungi; D_4__Glomeromycota; D_5__Incertae Sedis; D_6__Glomeromycetes; …
VTX00062 "OTU3.820011170844e+32" 0 0 0 0 0 0 0 0 0 0 0 0 0 0 0 0 0 0 0 0 0 0 0 0 0 0 0 0 0 0 0 0 0 0 0 0 0 0 0 1 1 0 0 0 0 0 1 0 0 0 0 0 0 0 0 0 0 0 0 1 0 0 0 0 0 2 0 0 1 0 2 2 0 0 0 0 0 0 0 0 0 2 0 0 0 11 0 1 0 0 0 0 0 0 0 0 0 0 0 0 0 0 0 0 0 0 0 0 0 0 0 0 0 0 0 0 "D_0__Eukaryota; D_1__Opisthokonta; D_2__Nucletmycea; D_3__Fungi; D_4__Glomeromycota; D_5__Incertae Sedis; D_6__Glomeromycetes; D_7__…
VTX00062 "OTU4.20069497246718e+32" 0 0 0 1 0 0 0 0 0 0 0 0 0 0 0 0 0 0 0 0 0 0 0 0 0 0 0 0 0 0 0 0 0 0 0 0 2 0 0 1 0 1 0 0 0 0 0 0 0 0 0 0 0 0 1 0 0 1 0 0 0 0 0 0 0 0 0 0 0 1 0 1 0 0 0 0 0 1 0 0 0 0 0 0 0 0 0 0 0 0 0 0 0 0 2 0 0 0 2 0 0 0 0 0 0 0 0 0 0 0 0 0 0 0 0 0 "D_0__Eukaryota; D_1__Opisthokonta; D_2__Nucletmycea; D_3__Fungi; D_4__Glomeromycota; D_5__Incertae Sedis; D_6__Glomeromycetes; D_7_…
VTX00062 "OTU2.8772730393128e+32" 531 3300 53 1060 903 122 399 635 2182 590 180 3 288 762 199 45 1 162 72 338 724 5598 98 2243 11 218 908 514 9 1292 431 54 1544 124 216 206 2897 2 882 57185 5959 2127 227 6231 85 279 4493 1626 3 553 19 834 4 3448 627 6111 432 3599 198 32183 661 10912 217 447 19 15292 13367 3 487 4373 23730 6251 7 99 17356 89 6 20231 9852 2 6 8316 518 80 4027 39314 2523 17251 683 1…
VTX00062 "OTU8.08202336391119e+32" 0 0 0 0 0 0 0 0 0 0 0 0 0 0 0 0 0 0 0 0 3 3 0 0 0 0 0 0 0 5 0 0 0 0 0 1 0 0 0 0 5 0 0 7 0 0 0 1 0 0 0 0 0 2 0 7 0 2 1 13 2 12 0 0 0 4 7 0 0 0 23 2 0 0 2 0 0 14 5 0 0 4 0 0 0 1 2 19 0 0 0 0 3 0 8 0 0 1 0 0 0 0 0 0 0 0 0 0 0 0 0 0 0 0 0 0 "D_0__Eukaryota; D_1__Opisthokonta; D_2__Nucletmycea; D_3__Fungi; D_4__Glomeromycota; D_5__Incertae Sedis; D_6__Glomeromycetes;…
VTX00062 "OTU2.6719668668752e+32" 0 0 0 0 2 0 2 0 9 1 0 0 2 0 0 2 0 0 1 0 1 4 1 3 0 0 11 7 0 5 2 0 4 1 0 1 10 0 2 0 8 3 2 14 0 1 3 1 0 1 2 4 0 4 12 7 3 4 0 13 0 12 4 0 4 13 7 0 0 3 9 10 0 3 7 12 0 9 5 0 3 7 6 11 5 24 9 19 0 6 1 9 7 0 24 0 0 4 1 0 10 0 0 0 0 0 1 0 0 0 1 0 0 3 0 0 "D_0__Eukaryota; D_1__Opisthokonta; D_2__Nucletmycea; D_3__Fungi; D_4__Glomeromycota; D_5__Incertae Sedis; D_6__Glomero…
VTX00062 "OTU7.93008156330181e+32" 268 1888 13 480 100 66 195 571 567 70 223 0 1 420 18 18 1 0 1 178 0 6 11 937 0 78 608 68 1 111 68 52 145 1 8 2 440 0 101 78 860 9 2 1528 26 22 8 39 0 5 0 97 0 607 1 20 74 455 2 10315 1 1105 734 1 1 1520 1921 1 47 2 15 16 1 0 1004 2 0 21 82 0 0 982 0 2 2 6071 17 33 15 235 1 16 5 2 497 2 2 0 697 0 0 0 0 0 2 1 4 0 2 1 0 1 0 2 1 0 "D_0__Eukaryota; D_1__Opisthokonta;…
VTX00062 "OTU2.67403753396845e+32" 0 0 0 0 0 0 0 0 0 0 0 0 0 0 0 0 0 0 0 0 0 0 0 0 0 0 0 0 0 0 0 0 0 0 0 0 0 0 0 0 1 0 0 0 0 0 4 0 0 0 0 1 0 0 0 0 0 0 0 1 0 0 1 0 0 1 2 0 0 0 0 4 0 0 1 0 0 0 0 0 0 2 0 0 0 2 2 0 0 0 0 0 0 0 1 0 0 0 6 0 0 0 0 0 0 0 0 0 0 0 0 0 0 0 0 0 "D_0__Eukaryota; D_1__Opisthokonta; D_2__Nucletmycea; D_3__Fungi; D_4__Glomeromycota; D_5__Incertae Sedis; D_6__Glomeromycetes; D_7_…
VTX00062 "OTU9.0639581082312e+32" 0 2 0 1 1 0 0 1 0 0 0 0 1 1 0 0 0 0 0 0 0 2 0 1 0 1 1 0 0 0 0 0 1 0 0 0 2 0 1 16 2 1 0 5 0 0 1 0 0 0 0 0 0 3 1 3 1 2 0 18 0 7 0 0 0 5 6 0 0 1 7 1 0 0 6 1 0 13 3 0 0 2 0 0 4 24 0 6 0 0 0 3 2 0 4 0 0 1 2 0 0 0 0 0 0 0 0 0 0 0 0 0 0 0 0 0 "D_0__Eukaryota; D_1__Opisthokonta; D_2__Nucletmycea; D_3__Fungi; D_4__Glomeromycota; D_5__Incertae Sedis; D_6__Glomeromycetes; D…
VTX00062 "OTU4.07438071033955e+32" 25 138 8 50 111 4 77 212 183 81 15 1 5 23 11 3 1 0 4 71 79 490 1 376 0 67 83 40 1 147 34 4 61 11 23 5 366 1 64 373 631 413 78 223 22 54 448 252 0 92 3 149 0 464 135 639 120 343 52 1107 116 666 43 63 0 1085 1366 0 100 728 994 399 8 27 1243 8 0 1196 930 0 1 600 85 17 74 1081 349 485 182 338 282 292 225 46 928 16 0 55 1256 1 2 2 0 0 1 1 0 0 0 0 1 2 1 14 0 1 "D_0__E…
VTX00062 "OTU7.58347147351792e+32" 2 0 0 1 0 0 0 0 4 0 0 0 1 0 0 0 0 0 0 1 8 12 0 8 0 0 0 1 0 2 0 0 0 0 0 0 5 0 0 6 11 7 3 1 1 5 16 1 0 0 8 3 0 5 1 3 5 11 0 9 4 0 0 0 0 24 12 0 6 5 22 3 0 4 12 0 0 3 12 0 0 16 11 12 1 11 14 51 9 5 3 13 2 1 14 0 0 8 38 0 1 0 0 0 0 0 0 0 0 0 0 0 0 0 0 0 "D_0__Eukaryota; D_1__Opisthokonta; D_2__Nucletmycea; D_3__Fungi; D_4__Glomeromycota; D_5__Incertae Sedis; D_6__Gl…
VTX00062 "OTU2.72096016588506e+32" 11 8 1 12 91 0 8 0 95 14 0 0 0 3 1 5 0 12 4 0 1 251 5 140 0 0 41 23 0 72 22 0 76 12 0 8 242 0 0 25 5 109 2 81 0 21 36 0 0 2 5 3 0 2 69 9 0 3 7 20 5 5 0 1 0 286 32 0 1 1 25 142 0 5 5 11 0 14 25 0 2 64 51 22 367 26 108 11 42 26 162 287 1 24 662 12 0 26 101 0 12 0 1 1 0 0 0 0 0 0 0 0 0 0 0 0 "D_0__Eukaryota; D_1__Opisthokonta; D_2__Nucletmycea; D_3__Fungi; D_4__Glo…
VTX00062 "OTU4.3195904138194e+32" 0 0 0 1 2 0 1 0 0 0 0 0 0 0 0 0 0 0 0 0 0 5 0 0 0 0 3 0 0 2 0 0 1 0 0 0 13 0 0 0 0 2 0 0 0 0 1 0 0 0 0 1 0 0 2 0 0 0 0 0 0 0 0 0 0 3 0 0 0 0 1 3 0 0 0 2 0 0 0 0 1 0 3 0 9 0 3 0 0 0 3 2 0 0 10 0 0 0 0 0 1 0 0 0 0 0 0 0 0 0 0 0 0 0 0 0 "D_0__Eukaryota; D_1__Opisthokonta; D_2__Nucletmycea; D_3__Fungi; D_4__Glomeromycota; D_5__Incertae Sedis; D_6__Glomeromycetes; D_7…
VTX00064 "OTU7.8832757275767e+32" 0 0 0 0 0 0 0 1 0 0 0 0 0 0 0 0 0 0 0 0 0 7 0 0 0 0 0 0 0 0 0 0 0 0 0 0 0 0 0 0 12 414 9 0 0 0 0 0 3 3 12 94 1 0 192 0 0 0 0 4 13 8 0 0 135 0 0 2 0 0 0 122 0 2 1 3 0 9 0 0 1 2 5 0 614 12 0 0 0 0 0 206 5 1 2 2 0 1 0 47 0 0 0 0 0 0 0 0 0 0 0 0 1 0 0 0 "D_0__Eukaryota; D_1__Opisthokonta; D_2__Nucletmycea; D_3__Fungi; D_4__Glomeromycota; D_5__Incertae Sedis; D_6__Glo…
VTX00064 "OTU9.01390466820672e+32" 0 0 0 0 0 1 1 1 0 0 0 0 0 1 0 0 0 0 0 0 0 7 0 0 0 0 1 0 0 7 0 0 0 0 0 0 0 0 0 0 147 5 12 10 0 0 2 0 3 7 13 110 0 0 26 0 0 0 0 194 19 65 0 0 0 1 0 1 0 0 0 3 3 3 0 14 0 147 3 0 0 7 21 0 15 0 2 16 0 0 0 4 30 0 16 0 0 4 0 0 0 0 0 0 0 0 0 0 0 0 0 0 0 0 0 0 "D_0__Eukaryota; D_1__Opisthokonta; D_2__Nucletmycea; D_3__Fungi; D_4__Glomeromycota; D_5__Incertae Sedis; D_6__…
VTX00064 "OTU7.9709815078186e+32" 0 0 0 0 0 0 0 0 0 0 0 0 0 0 0 0 0 0 0 0 0 0 0 0 0 0 0 0 0 0 0 0 0 0 0 0 0 0 0 0 0 0 0 0 0 0 0 0 0 0 0 0 0 0 0 0 0 0 0 0 0 0 0 0 0 0 0 0 0 0 0 0 0 0 0 0 0 0 0 0 0 0 0 0 18 0 0 0 0 0 0 0 0 0 0 0 0 0 0 0 0 0 0 0 0 0 0 0 0 0 0 0 0 0 0 0 "D_0__Eukaryota; D_1__Opisthokonta; D_2__Nucletmycea; D_3__Fungi; D_4__Glomeromycota; D_5__Incertae Sedis; D_6__Glomeromycetes; D_7_…
VTX00064 "OTU9.64437514698957e+32" 0 0 0 0 0 0 0 0 0 0 0 0 0 0 1 0 0 0 0 0 0 0 0 0 0 0 0 0 0 0 0 0 0 0 0 0 0 0 0 0 0 5 0 0 0 0 0 0 0 0 0 15742 0 0 2 0 0 0 0 0 1 0 0 0 0 0 0 0 0 0 1 2 0 1 0 0 0 0 0 0 0 1 0 1 1 0 0 0 1 1 0 0 0 0 0 0 1 0 0 0 0 0 0 0 0 0 0 0 0 0 1 0 0 0 0 0 "D_0__Eukaryota; D_1__Opisthokonta; D_2__Nucletmycea; D_3__Fungi; D_4__Glomeromycota; D_5__Incertae Sedis; D_6__Glomeromycetes; …
VTX00064 "OTU9.90551074970142e+32" 0 1 0 0 0 1 0 0 0 1 0 0 0 1 0 0 0 0 0 0 0 0 0 0 0 0 0 0 1 2 0 0 0 0 1 0 0 0 0 0 18 3 30 0 0 0 0 0 2 7 13 59 1 0 64 0 2 0 0 10 15 6 0 0 2 1 0 0 0 0 0 120 0 1 0 7 0 13 0 0 0 2 3 0 2099 0 1 1 0 0 0 100 2 0 1 0 0 1 0 1 0 0 0 0 0 0 0 0 0 0 0 0 0 0 0 0 "D_0__Eukaryota; D_1__Opisthokonta; D_2__Nucletmycea; D_3__Fungi; D_4__Glomeromycota; D_5__Incertae Sedis; D_6__Glome…
VTX00064 "OTU6.75576357112458e+32" 0 0 0 0 0 0 2 5 0 0 0 0 0 2 0 0 0 0 0 0 0 0 0 0 0 0 0 0 0 2 0 0 0 0 0 0 0 0 0 0 15 1 5 0 0 0 0 0 7 8 21 12 0 0 5 0 1 0 0 10 11 10 0 0 0 0 0 6 0 0 0 0 0 3 0 3 0 3 1 0 0 2 7 0 3 0 0 0 0 0 0 0 0 0 4 3 0 0 0 5 0 0 0 0 0 0 0 0 0 0 0 0 0 0 0 0 "D_0__Eukaryota; D_1__Opisthokonta; D_2__Nucletmycea; D_3__Fungi; D_4__Glomeromycota; D_5__Incertae Sedis; D_6__Glomeromycetes…
VTX00064 "OTU6.91252033631017e+32" 0 25 1 8 20 361 140 266 0 1 0 0 1 262 1 0 0 0 16 0 0 161 1 20 0 0 40 0 31 360 8 0 0 1 0 89 0 0 0 2 3355 38 2404 111 33 0 62 0 446 781 2267 11723 1 0 733 0 48 0 0 2039 2447 1631 1 0 5 13 0 111 8 0 0 9 83 424 0 804 0 2216 112 0 1 167 722 1 142 1 135 251 3 0 0 6 1575 47 192 249 0 85 0 256 23 0 0 0 0 0 0 2 1 0 0 0 2 0 0 0 "D_0__Eukaryota; D_1__Opisthokonta; D_2__Nuc…
VTX00064 "OTU2.79381819530649e+31" 0 0 0 0 0 0 0 0 0 0 0 0 0 0 0 0 0 0 0 0 0 0 0 0 0 0 0 0 0 0 0 0 0 0 0 0 0 0 0 0 0 0 0 0 0 0 0 0 0 0 0 25 0 0 0 0 0 0 0 0 0 0 0 0 0 0 0 0 0 0 0 0 0 0 0 0 0 0 0 0 0 0 0 0 0 0 0 0 0 0 0 0 0 0 0 0 0 0 0 0 0 0 0 0 0 0 0 0 0 0 0 0 0 0 0 0 "D_0__Eukaryota; D_1__Opisthokonta; D_2__Nucletmycea; D_3__Fungi; D_4__Glomeromycota; D_5__Incertae Sedis; D_6__Glomeromycetes; D_7…
VTX00065 "OTU7.09692476733249e+32" 81 0 23 200 125 123 3 41 1 475 2 0 648 0 81 928 0 0 493 0 0 2 0 160 0 17 0 55 0 4 5 97 2 0 785 156 0 0 87 1 0 0 0 0 0 0 0 0 0 0 1 1 1 0 0 1 0 1 0 1 0 0 0 0 0 0 2 0 0 0 0 1 0 0 0 0 0 2 5 0 0 0 0 0 0 0 0 0 0 0 3 0 0 0 0 0 0 2 1 0 0 0 0 0 1 0 0 0 0 1 0 0 0 0 1 0 "D_0__Eukaryota; D_1__Opisthokonta; D_2__Nucletmycea; D_3__Fungi; D_4__Glomeromycota; D_5__Incertae Sedi…
VTX00067 "OTU9.24692450309507e+32" 142 1520 279 1917 6523 80 4608 407 1568 18639 4 2 5379 68 7352 2790 39 107 5264 167 3 2014 124 17601 324 519 1238 8183 184 3446 1032 11392 1036 3089 45 686 596 34 16848 551 239 183 249 617 185 877 68 182 2878 973 234 5662 1 3296 886 589 58 902 1246 496 2353 1987 97 889 781 1359 6199 4 183 240 98 4 4 147 744 581 1394 1513 1344 597 153 673 1177 1525 0 43 2508 9 11…
VTX00067 "OTU1.21989346961858e+32" 0 2 0 0 9 0 2 0 0 5 0 0 0 0 1 0 0 0 0 0 0 10 0 23 0 0 2 2 0 1 0 0 1 0 0 0 1 0 1 1 1 0 0 4 0 1 0 0 6 2 1 4 0 12 0 2 0 8 0 3 10 6 2 0 0 1 9 0 0 0 0 0 1 0 1 2 4 1 2 0 0 4 0 4 0 0 4 0 0 2 2 0 2 25 5 1 0 22 4 0 0 0 5 1 0 0 0 0 15 0 3 0 0 0 1 0 "D_0__Eukaryota; D_1__Opisthokonta; D_2__Nucletmycea; D_3__Fungi; D_4__Glomeromycota; D_5__Incertae Sedis; D_6__Glomeromycete…
VTX00067 "OTU4.06509712396023e+32" 0 2 0 0 0 0 8 0 0 4 0 0 0 0 6 0 0 0 6 0 0 0 0 0 0 0 4 0 0 0 0 0 0 0 0 0 1 0 10 0 1 0 0 0 0 15 0 0 0 4 8 8 0 17 7 1 0 5 15 1 8 1 0 0 0 1 6 0 0 0 2 0 0 3 6 1 6 0 3 0 0 13 1 10 0 0 7 0 1 25 52 0 0 0 2 1 9 42 4 1 0 0 1 6 0 0 0 0 19 0 0 0 0 0 0 0 "D_0__Eukaryota; D_1__Opisthokonta; D_2__Nucletmycea; D_3__Fungi; D_4__Glomeromycota; D_5__Incertae Sedis; D_6__Glomeromyc…
VTX00067 "OTU9.41281591749075e+32" 0 0 1 10 4 0 2 0 2 1 0 0 1 0 0 0 0 0 0 0 0 4 0 12 0 1 1 6 0 0 1 0 0 0 0 0 2 0 0 0 0 0 0 7 0 0 0 0 0 0 0 0 0 2 0 1 0 0 0 1 1 4 0 0 0 0 3 0 0 0 0 0 0 0 0 0 0 0 1 0 0 0 3 0 0 0 1 0 1 0 0 4 1 27 0 0 0 1 2 0 0 0 0 0 0 0 0 0 0 0 0 0 0 0 0 0 "D_0__Eukaryota; D_1__Opisthokonta; D_2__Nucletmycea; D_3__Fungi; D_4__Glomeromycota; D_5__Incertae Sedis; D_6__Glomeromycetes; D…
VTX00067 "OTU7.20192264999458e+32" 0 1 0 6 6 0 3 0 1 18 0 0 126 0 7 3 0 0 4 0 0 2 0 13 0 0 1 10 0 5 1 29 3 0 0 2 2 0 19 0 1 1 1 0 0 3 0 0 1 3 1 2 0 2 2 0 0 2 2 2 1 0 0 4 0 0 6 0 0 0 0 0 0 0 0 0 3 3 0 3 0 4 0 0 0 0 3 0 1 1 4 0 0 16 0 0 0 17 0 0 0 0 0 1 0 0 0 0 2 0 0 0 0 0 0 0 "D_0__Eukaryota; D_1__Opisthokonta; D_2__Nucletmycea; D_3__Fungi; D_4__Glomeromycota; D_5__Incertae Sedis; D_6__Glomeromyce…
VTX00086 "OTU2.13613344942573e+32" 0 0 0 0 27 6 7 45 0 27 0 0 0 0 0 0 19 0 0 12 0 294 0 7 0 0 0 7 0 49 13 10 0 0 19 0 32 0 33 0 0 418 0 0 59 372 26 10 63 2 3 246 1 212 8 189 60 10 39 1 4 76 447 1 250 0 0 0 0 0 0 0 0 0 0 0 0 0 0 0 0 0 0 0 0 0 0 0 0 0 0 0 0 0 0 0 0 0 0 0 0 0 0 0 0 0 0 0 0 0 0 0 0 0 0 0 "D_0__Eukaryota; D_1__Opisthokonta; D_2__Nucletmycea; D_3__Fungi; D_4__Glomeromycota; D_5__Incert…
VTX00086 "OTU8.89907515068202e+32" 0 0 0 0 0 0 0 2 0 0 0 0 0 0 0 0 0 0 0 0 0 0 0 0 0 0 0 0 0 0 0 0 0 0 0 0 1 0 0 0 0 2 0 0 1 2 1 0 0 0 0 0 0 2 0 0 0 0 0 0 1 0 2 0 3 0 0 0 0 0 0 0 0 0 0 0 0 0 0 0 0 0 0 0 0 0 0 0 0 0 0 0 0 0 0 0 0 0 0 0 0 0 0 0 0 0 0 0 0 0 0 0 0 0 0 0 "D_0__Eukaryota; D_1__Opisthokonta; D_2__Nucletmycea; D_3__Fungi; D_4__Glomeromycota; D_5__Incertae Sedis; D_6__Glomeromycetes; D_7_…
VTX00086 "OTU3.69138823420297e+32" 0 0 0 0 0 0 0 0 0 0 0 0 0 0 0 0 0 0 0 0 0 0 0 0 0 0 0 2 0 0 0 0 0 0 0 0 0 0 2 0 0 0 0 0 0 0 0 0 0 0 0 0 0 0 0 1 0 0 0 0 0 0 0 0 1 0 0 0 0 0 0 0 0 0 0 0 0 0 0 0 0 0 0 0 0 0 0 0 0 0 0 0 0 0 0 0 0 0 0 0 0 0 0 0 0 0 0 0 0 0 0 0 0 0 0 0 "D_0__Eukaryota; D_1__Opisthokonta; D_2__Nucletmycea; D_3__Fungi; D_4__Glomeromycota; D_5__Incertae Sedis; D_6__Glomeromycetes; D_7_…
VTX00086 "OTU3.78691745918758e+32" 0 0 0 0 0 0 0 0 0 0 0 0 0 0 0 0 0 0 0 0 0 0 0 0 0 0 0 0 0 0 0 0 0 0 0 0 0 0 0 0 0 0 0 0 0 5 0 0 0 0 0 0 0 0 0 0 0 0 0 0 0 0 0 0 0 0 0 0 0 0 0 0 0 0 0 0 0 0 0 0 0 0 0 0 0 0 0 0 0 0 0 0 0 0 0 0 0 0 0 0 0 0 0 0 0 0 0 0 0 0 0 0 0 0 0 0 "D_0__Eukaryota; D_1__Opisthokonta; D_2__Nucletmycea; D_3__Fungi; D_4__Glomeromycota; D_5__Incertae Sedis; D_6__Glomeromycetes; D_7_…
VTX00092 "OTU5.62193738475372e+32" 49 21 310 31 22 15 145 166 105 38 130 0 5 6 1 12 196 3 17 91 2 0 2 45 8 266 30 38 2 40 18 8 18 24 138 5 218 75 1 0 14 130 0 5 3 34 8 21 1 16 27 2 0 0 11 0 0 2 30 0 2 2 0 4 7 3 2 1 50 104 2 0 1 6 16 56 5 0 45 0 0 2 2 4 1 0 0 0 2 2 4 0 1 3 13 0 0 4 1 3 1 1 1 2 1 1 0 4 0 1 3 0 1 1 0 1 "D_0__Eukaryota; D_1__Opisthokonta; D_2__Nucletmycea; D_3__Fungi; D_4__Glomeromyc…
VTX00093 "OTU9.9444257707195e+32" 0 0 0 0 0 0 0 0 0 0 0 0 0 0 0 0 0 0 0 0 0 0 0 0 0 0 0 0 0 0 0 0 0 0 0 0 0 0 0 0 1 0 0 0 0 0 0 0 0 0 0 0 0 0 0 0 0 0 0 0 0 0 0 0 0 0 0 0 0 0 0 0 0 0 0 0 0 0 0 0 0 0 0 0 0 0 0 0 0 0 0 0 0 0 0 0 0 0 0 0 1 0 0 0 0 0 0 0 0 0 0 0 0 0 0 0 "D_0__Eukaryota; D_1__Opisthokonta; D_2__Nucletmycea; D_3__Fungi; D_4__Glomeromycota; D_5__Incertae Sedis; D_6__Glomeromycetes; D_7__…
VTX00093 "OTU5.23566813819642e+32" 1 1 2 1 0 0 0 15 0 6 0 789 0 0 1 0 0 0 0 2 2 338 0 1 0 0 0 0 2 0 0 0 0 0 0 0 1 0 0 0 173 2 51 20 53 0 114 35 1820 139 27 253 1 3 45 24 20 21 357 4 0 125 1769 726 1452 1 1 1 46 185 0 0 931 40 0 0 1640 0 28 126 617 238 32 0 0 1 41 1 191 152 13 0 0 62 0 28 21 0 32 616 768 222 1600 1387 2351 1378 1088 9 1223 606 2033 2414 1583 4 2774 1 "D_0__Eukaryota; D_1__Opisthok…
VTX00093 "OTU6.90931544809075e+32" 0 1 2 0 0 0 0 0 0 0 0 0 0 0 0 0 0 0 0 0 0 0 0 0 0 0 2 0 0 0 0 0 0 0 0 0 1 0 0 0 16 0 0 0 0 0 0 0 0 0 0 0 0 0 0 0 0 0 2 20 0 1 0 2 1 0 0 0 2 0 0 0 10 0 0 0 1 0 0 0 2 0 0 0 0 0 0 0 2 0 0 0 0 0 0 0 0 0 0 0 0 0 0 0 1 0 0 0 0 2 0 1 0 11 6 0 "D_0__Eukaryota; D_1__Opisthokonta; D_2__Nucletmycea; D_3__Fungi; D_4__Glomeromycota; D_5__Incertae Sedis; D_6__Glomeromycetes; …
VTX00093 "OTU5.77213174316377e+32" 0 0 0 0 0 0 0 0 0 0 0 4 0 0 0 0 1 0 0 0 0 2 0 0 0 0 0 0 0 0 0 0 0 0 0 0 0 0 0 0 29 0 0 4 0 0 0 1 29 2 0 4 31 1 0 1 0 0 2 19 0 4 59 0 27 3 0 0 3 1 0 0 166 0 0 0 9 0 0 14 9 1 0 0 0 1 0 0 0 0 0 0 0 2 0 0 38 0 0 19 24 3 45 102 102 56 38 22 155 42 132 66 50 25 130 3 "D_0__Eukaryota; D_1__Opisthokonta; D_2__Nucletmycea; D_3__Fungi; D_4__Glomeromycota; D_5__Incertae Se…
VTX00093 "OTU9.8620502420944e+32" 0 0 0 0 0 0 0 0 0 0 0 0 0 0 0 0 0 0 0 0 0 7 0 0 0 0 0 0 0 0 0 0 0 0 0 0 0 0 0 0 1 0 1 0 0 0 1 0 42 2 1 6 4 1 0 0 0 0 4 1 0 1 19 2 8 0 0 0 0 0 0 0 30 1 0 0 19 0 2 4 0 1 0 0 0 0 0 0 7 0 0 0 0 1 0 1 8 0 0 9 6 1 25 16 13 6 9 0 49 78 38 20 17 3 74 0 "D_0__Eukaryota; D_1__Opisthokonta; D_2__Nucletmycea; D_3__Fungi; D_4__Glomeromycota; D_5__Incertae Sedis; D_6__Glomerom…
VTX00093 "OTU6.38804803560113e+32" 0 0 1 0 0 0 0 0 0 0 0 0 0 0 0 0 0 0 0 1 0 1 1 0 0 2 2 0 1 0 0 0 0 0 0 0 0 0 0 0 902 0 0 0 0 0 0 0 260 0 0 3 0 0 0 0 0 0 4 999 1 0 2 4 2 0 0 0 54 0 0 0 418 0 0 1 5 0 0 2 81 0 0 0 0 2 0 0 0 1 0 0 0 0 0 2 1 0 0 20 82 1 0 2 3 2 1 3 4 1 2 1 5 1158 438 1 "D_0__Eukaryota; D_1__Opisthokonta; D_2__Nucletmycea; D_3__Fungi; D_4__Glomeromycota; D_5__Incertae Sedis; D_6__Glo…
VTX00093 "OTU6.07337788428797e+32" 0 4 3 2 1 0 0 3 1 0 1 0 0 0 0 0 0 0 0 15 0 58 0 3 0 0 4 0 0 1 1 1 1 0 0 0 1 0 1 0 112 8 0 3 0 6 8 2 0 0 0 12 1 25 0 24 0 2 1 423 3 32 39 3 6 3 2 0 2 3 0 0 12 2 21 0 0 20 2 0 2 12 0 0 0 3 1 0 0 0 0 0 0 0 0 2 0 0 5 2 0 1 0 2 9 0 3 0 0 0 0 0 0 3 1 0 "D_0__Eukaryota; D_1__Opisthokonta; D_2__Nucletmycea; D_3__Fungi; D_4__Glomeromycota; D_5__Incertae Sedis; D_6__Glome…
VTX00093 "OTU2.32093061387708e+32" 0 0 0 0 0 0 0 0 0 0 0 2 0 0 0 0 0 0 0 0 0 0 0 0 0 0 0 0 0 0 0 0 0 1 0 0 0 0 0 0 0 0 0 0 0 0 0 0 1 1 0 0 0 0 2 0 0 0 0 0 0 0 5 0 2 0 0 0 0 0 0 0 9 0 0 0 5 0 0 0 0 0 0 0 0 0 0 0 0 0 0 0 0 0 0 1 520 0 0 0 1 0 2 6 463 6 2 6 9 2 19 488 6 2 481 1 "D_0__Eukaryota; D_1__Opisthokonta; D_2__Nucletmycea; D_3__Fungi; D_4__Glomeromycota; D_5__Incertae Sedis; D_6__Glomeromyce…
VTX00093 "OTU5.42968101425917e+32" 0 0 0 0 0 0 0 0 0 0 0 2 0 0 0 0 0 0 0 1 0 2 0 0 0 0 0 0 0 0 0 0 0 0 0 0 0 0 0 0 18 0 0 0 0 0 1 0 12 0 0 0 7 0 0 0 0 0 0 37 0 1 22 0 1 0 0 0 3 0 0 1 16 0 0 0 2 0 2 0 2 0 0 0 0 2 0 0 0 0 0 0 0 0 0 1 0 0 0 1 2 0 3 6 35 8 8 2 8 0 7 10 1 8 7 0 "D_0__Eukaryota; D_1__Opisthokonta; D_2__Nucletmycea; D_3__Fungi; D_4__Glomeromycota; D_5__Incertae Sedis; D_6__Glomeromycete…
VTX00093 "OTU4.81942748523846e+32" 0 0 0 0 0 0 0 0 0 0 0 0 0 0 0 0 0 0 0 0 0 0 0 0 0 0 0 0 0 0 0 0 0 0 0 0 0 0 0 0 3 0 0 0 0 0 0 0 16 0 0 0 0 0 0 1 0 0 0 0 0 2 0 0 0 0 0 0 0 0 0 0 8 0 0 0 0 0 0 0 0 0 0 0 0 0 0 0 0 0 0 0 0 0 0 0 0 0 0 1 0 0 0 0 42 2 0 1 0 0 1 1 2 1 0 1 "D_0__Eukaryota; D_1__Opisthokonta; D_2__Nucletmycea; D_3__Fungi; D_4__Glomeromycota; D_5__Incertae Sedis; D_6__Glomeromycetes; D_…
VTX00093 "OTU5.5713642205416e+32" 0 0 0 0 0 0 0 0 0 0 0 1 0 0 0 0 0 0 0 0 0 0 0 0 0 0 0 0 0 0 0 0 0 0 0 0 0 0 0 0 0 1 0 0 0 0 3 0 3 0 1 0 3 0 0 0 0 0 0 3 0 0 10 0 4 0 0 0 2 0 0 0 10 0 0 0 8 0 0 1 0 0 0 0 0 0 1 0 0 0 0 0 0 0 0 1 6 0 0 8 13 0 3 8 2 1 33 11 27 1 6 3 9 1 28 1 "D_0__Eukaryota; D_1__Opisthokonta; D_2__Nucletmycea; D_3__Fungi; D_4__Glomeromycota; D_5__Incertae Sedis; D_6__Glomeromycetes…
VTX00093 "OTU7.88206037822853e+32" 1 0 10 5 1 1 1 2 0 4 3 381 0 2 1 0 0 0 0 16 0 113 0 1 0 4 1 1 0 1 2 5 2 1 0 0 0 0 0 2 1318 3 37 58 7 1 109 51 3071 159 18 90 626 24 15 60 3 2 202 1846 24 314 6351 27 2320 117 1 1 233 182 0 2 4107 92 1 1 2667 0 54 692 386 143 1 0 0 45 10 1 76 9 2 0 0 4 0 135 9139 1 35 1635 1648 111 2606 5072 12471 3996 2893 2130 6427 688 8344 3756 2818 2278 5208 473 "D_0__Eukaryo…
VTX00105 "OTU1.02581343468771e+31" 0 0 0 0 2 6 0 2 21 1 0 0 0 0 0 5 0 0 0 0 0 0 0 0 0 0 0 0 0 2 0 5 0 0 0 0 0 18 0 0 0 0 0 0 0 0 0 0 0 0 0 0 0 0 0 0 0 0 0 0 0 0 0 0 0 0 0 0 1 0 0 0 0 0 0 0 0 0 0 0 0 0 0 0 0 0 0 0 0 0 0 0 0 0 0 0 0 0 0 0 0 0 0 0 0 0 0 0 0 0 0 0 0 0 0 0 "D_0__Eukaryota; D_1__Opisthokonta; D_2__Nucletmycea; D_3__Fungi; D_4__Glomeromycota; D_5__Incertae Sedis; D_6__Glomeromycetes; D_…
VTX00108 "OTU6.4023041473958e+32" 0 0 0 0 4 0 0 3 0 0 0 0 0 0 0 0 0 0 0 0 0 0 0 3 0 1 0 0 0 1 0 1 0 0 1 0 0 0 0 0 0 0 0 0 0 0 0 0 0 0 0 0 0 0 0 0 0 0 0 0 0 0 0 0 0 0 0 0 0 0 0 0 0 0 0 0 0 0 0 0 0 0 0 0 0 0 0 0 0 0 0 0 0 0 0 0 0 0 0 0 0 0 0 0 0 0 0 0 0 0 0 0 0 0 0 0 "D_0__Eukaryota; D_1__Opisthokonta; D_2__Nucletmycea; D_3__Fungi; D_4__Glomeromycota; D_5__Incertae Sedis; D_6__Glomeromycetes; D_7__…
VTX00108 "OTU4.92629463495319e+32" 0 20 8 6 290 2 149 856 190 1000 85 0 21 66 23 8 9 0 85 73 2 0 5 67 0 252 322 1 0 595 10 983 125 41 33 0 52 1 11 0 0 0 0 2 0 0 1 0 0 0 0 0 1 0 1 0 1 0 0 0 0 0 0 0 0 0 1 0 0 0 0 0 1 0 1 1 0 0 0 0 0 0 0 0 0 0 0 0 0 0 1 0 0 0 0 1 0 0 1 0 0 0 0 0 1 0 0 0 0 0 0 1 0 1 0 0 "D_0__Eukaryota; D_1__Opisthokonta; D_2__Nucletmycea; D_3__Fungi; D_4__Glomeromycota; D_5__Incerta…
VTX00108 "OTU8.52994368646389e+32" 0 0 0 0 5 4 6 12 12 0 0 0 3 0 0 4 0 0 3 0 0 0 0 4 0 8 8 0 0 9 0 12 0 0 3 0 0 8 1 0 0 0 1 0 0 0 0 1 0 1 0 0 0 0 0 0 0 0 0 0 0 0 0 0 0 0 0 0 0 1 0 0 0 0 0 0 0 0 0 0 0 0 0 0 0 0 0 0 0 0 0 0 0 0 0 0 0 0 0 0 1 0 0 0 0 0 0 0 0 1 0 0 0 0 0 0 "D_0__Eukaryota; D_1__Opisthokonta; D_2__Nucletmycea; D_3__Fungi; D_4__Glomeromycota; D_5__Incertae Sedis; D_6__Glomeromycetes; D…
VTX00109 "OTU2.25741728193313e+32" 0 0 0 0 2 0 0 0 0 0 0 1 0 0 0 0 0 0 1 0 0 12 0 0 0 0 0 0 0 0 0 0 0 0 0 0 0 0 1 10 3 0 3 36 4 9 14 226 520 7 10 1 472 6 0 3 7 11 1 1 27 10 897 1 110 2 0 0 4 0 0 13 980 2 0 3 66 3 1 1 15 14 0 0 0 15 1 0 1 0 0 0 5 8 1 15 4 1 1 98 196 94 705 61 896 1 970 18 67 166 22 166 46 260 39 8 "D_0__Eukaryota; D_1__Opisthokonta; D_2__Nucletmycea; D_3__Fungi; D_4__Glomeromycota…
VTX00109 "OTU4.20192055254116e+32" 0 0 0 0 5 0 0 0 0 1 0 0 0 0 0 1 0 0 0 0 0 6 0 0 0 0 0 0 0 0 0 0 0 0 0 0 0 0 0 1 3 0 1 18 2 5 2 6 15 7 4 0 3 1 0 1 1 6 0 0 2 2 3 0 0 1 0 0 2 0 0 12 17 4 0 1 2 0 3 0 0 11 0 0 0 0 0 0 0 0 1 0 2 2 2 5 0 0 0 1 1 1 5 0 6 0 4 0 2 0 1 8 0 4 3 2 "D_0__Eukaryota; D_1__Opisthokonta; D_2__Nucletmycea; D_3__Fungi; D_4__Glomeromycota; D_5__Incertae Sedis; D_6__Glomeromycetes;…
VTX00109 "OTU7.71397767952546e+32" 0 0 0 0 0 0 0 0 0 0 0 0 0 0 0 0 0 0 0 0 0 0 0 0 0 0 0 0 0 0 0 0 0 0 0 0 0 0 0 0 0 0 0 0 1 0 0 2 2 0 0 0 1 0 0 0 0 0 1 0 0 0 1 0 0 0 0 0 0 0 0 0 3 0 0 0 0 0 0 0 0 0 0 0 0 1 0 0 0 0 0 0 0 0 0 0 0 0 0 1 0 1 1 0 1 0 1 0 1 0 0 2 0 0 1 0 "D_0__Eukaryota; D_1__Opisthokonta; D_2__Nucletmycea; D_3__Fungi; D_4__Glomeromycota; D_5__Incertae Sedis; D_6__Glomeromycetes; D_7_…
VTX00109 "OTU2.53195526473046e+32" 0 0 0 0 0 0 0 0 0 0 0 0 0 0 0 0 0 0 0 0 0 3 0 0 0 0 0 0 0 0 0 0 0 0 0 0 0 0 0 5 2 1 4 18 4 3 4 6 9 7 9 0 2 5 1 1 6 4 1 2 5 2 4 0 0 1 0 0 5 1 0 14 35 4 0 2 3 0 2 1 5 20 0 2 0 3 0 0 0 0 0 0 0 6 3 9 1 0 4 3 3 4 14 0 8 2 16 5 2 4 0 17 0 20 9 7 "D_0__Eukaryota; D_1__Opisthokonta; D_2__Nucletmycea; D_3__Fungi; D_4__Glomeromycota; D_5__Incertae Sedis; D_6__Glomeromycet…
VTX00109 "OTU6.02298214216784e+32" 0 0 0 0 0 0 0 0 0 0 0 0 0 0 0 0 0 0 0 0 0 0 0 0 0 0 0 0 0 0 0 0 0 0 0 0 0 0 0 0 0 0 0 0 0 0 0 0 2 0 0 0 0 0 0 0 0 0 0 0 0 0 0 0 0 0 0 0 0 0 0 0 8 0 0 0 0 0 0 0 0 0 0 0 0 0 0 0 0 0 0 0 0 0 0 0 0 0 0 0 0 0 0 0 0 0 0 0 0 0 0 0 0 0 0 0 "D_0__Eukaryota; D_1__Opisthokonta; D_2__Nucletmycea; D_3__Fungi; D_4__Glomeromycota; D_5__Incertae Sedis; D_6__Glomeromycetes; D_7_…
VTX00109 "OTU2.64920169853362e+32" 0 0 0 0 0 0 0 0 0 0 0 0 0 0 0 0 0 0 0 0 0 0 0 0 0 0 0 0 0 0 0 0 0 0 0 0 0 0 0 0 0 0 0 0 0 0 0 0 205 0 0 0 0 0 0 0 0 0 0 0 0 0 181 0 0 0 0 0 0 0 0 0 2 0 0 0 0 0 0 0 0 0 0 0 0 0 0 0 0 0 0 0 0 0 0 0 0 0 0 25 0 0 210 0 0 0 0 0 0 0 0 0 0 0 1 0 "D_0__Eukaryota; D_1__Opisthokonta; D_2__Nucletmycea; D_3__Fungi; D_4__Glomeromycota; D_5__Incertae Sedis; D_6__Glomeromycete…
VTX00109 "OTU8.44871107502705e+31" 0 0 0 1 3 0 0 0 0 2 0 1 0 0 0 0 0 0 0 1 6 34 0 0 0 0 0 0 0 0 0 0 0 1 5 0 0 0 0 12 7 1 14 108 12 17 11 712 1941 18 26 4 321 9 0 6 29 22 2 6 93 9 2513 2 102 4 1 2 7 3 0 16 2076 13 0 4 291 4 16 5 38 57 0 2 0 33 1 6 3 1 2 0 8 19 5 44 197 1 14 172 446 322 1210 164 3781 5 1463 868 541 471 12 1858 247 30 819 23 "D_0__Eukaryota; D_1__Opisthokonta; D_2__Nucletmycea; D_3_…
VTX00109 "OTU6.90371557472638e+31" 0 0 0 0 0 0 0 0 0 0 0 0 0 0 0 0 0 0 0 0 0 0 0 0 0 0 0 0 0 0 0 0 0 0 0 0 0 0 0 0 0 0 0 0 0 0 0 0 0 0 0 0 0 0 0 0 0 0 0 0 0 0 0 0 0 0 0 0 0 0 0 0 2 0 0 0 0 0 0 0 0 0 0 0 0 0 0 0 0 0 0 0 0 0 0 0 0 0 0 0 0 0 1 0 1 0 0 0 0 0 0 0 0 0 0 0 "D_0__Eukaryota; D_1__Opisthokonta; D_2__Nucletmycea; D_3__Fungi; D_4__Glomeromycota; D_5__Incertae Sedis; D_6__Glomeromycetes; D_7_…
VTX00113 "OTU4.4894895535133e+32" 0 0 0 0 0 0 0 0 0 0 0 0 0 0 0 0 0 0 0 0 0 0 0 0 0 1 0 0 0 0 0 0 0 0 0 0 0 0 0 0 0 1 1 0 3 0 0 0 0 1 1 0 0 1 0 0 2 0 0 0 0 1 0 0 1 1 1 1 3 1 1 1 2 1 1 1 0 0 0 0 0 0 0 0 0 0 0 0 0 0 0 0 0 0 0 0 0 0 0 0 0 0 0 0 0 0 0 0 0 0 0 0 0 0 0 0 "D_0__Eukaryota; D_1__Opisthokonta; D_2__Nucletmycea; D_3__Fungi; D_4__Glomeromycota; D_5__Incertae Sedis; D_6__Glomeromycetes; D_7__…
VTX00113 "OTU9.49612551504778e+32" 0 0 0 0 0 0 0 0 0 0 0 0 0 0 0 0 0 0 0 0 0 0 0 0 0 0 0 0 0 0 0 0 0 0 1 0 0 0 0 0 1 0 0 0 0 0 0 49 0 0 0 1 0 1 1 0 0 0 1 0 0 1 0 0 0 6 5 0 0 0 0 0 0 0 0 0 0 56 0 0 0 2 0 0 0 0 0 0 84 95 0 0 0 3 0 0 0 0 2 7 3 0 0 0 0 0 0 0 0 0 0 0 0 0 0 0 "D_0__Eukaryota; D_1__Opisthokonta; D_2__Nucletmycea; D_3__Fungi; D_4__Glomeromycota; D_5__Incertae Sedis; D_6__Glomeromycetes; …
VTX00113 "OTU2.67346706023499e+32" 0 0 0 0 0 0 0 1 0 0 0 0 0 0 0 0 0 0 0 0 0 0 0 0 0 0 0 0 0 0 0 0 0 0 0 0 0 0 0 0 0 0 0 0 1 0 0 0 0 0 0 0 0 0 0 1 1 0 0 0 1 1 0 0 0 0 0 0 0 0 0 0 0 0 0 0 0 0 0 0 0 0 0 1 0 0 0 0 0 0 0 0 0 0 0 0 0 0 0 0 0 0 0 0 0 0 0 0 0 0 0 0 0 0 0 0 "D_0__Eukaryota; D_1__Opisthokonta; D_2__Nucletmycea; D_3__Fungi; D_4__Glomeromycota; D_5__Incertae Sedis; D_6__Glomeromycetes; D_7_…
VTX00113 "OTU8.83796084749743e+32" 1 0 1 0 0 0 0 1 0 0 0 0 0 0 0 0 2 0 0 0 0 2 0 0 0 1 0 0 0 0 0 0 0 0 0 0 0 0 0 0 0 3 1 1 5 5 0 1 0 0 1 2 0 1 0 1 0 0 1 0 1 2 0 0 0 0 0 1 0 0 0 0 2 0 0 0 0 0 1 0 0 3 0 0 0 0 0 0 1 0 0 0 0 0 0 0 0 0 0 0 2 1 0 0 0 0 0 0 0 1 0 0 1 0 0 0 "D_0__Eukaryota; D_1__Opisthokonta; D_2__Nucletmycea; D_3__Fungi; D_4__Glomeromycota; D_5__Incertae Sedis; D_6__Glomeromycetes; D_7_…
VTX00113 "OTU7.6500914901602e+32" 2028 1034 17009 1273 1235 1139 11160 20127 7710 4908 8271 163 802 389 360 1851 20229 182 1297 8655 40395 3465 139 5182 312 33368 2004 2949 424 3144 2910 1944 820 1146 14891 342 9572 3314 164 428 12099 49410 42370 3155 29159 28146 24382 25286 21 19995 31431 15973 26 18437 28733 19139 27054 10992 54044 3521 15371 10173 252 40313 9840 15476 26337 26460 49806 69038 1…
VTX00113 "OTU1.08436314787959e+32" 4 8 8 10 23 3 99 21 27 74 3 0 10 0 6 11 17 1 21 2 13 15 0 131 1 17 6 53 0 40 14 18 1 9 49 0 13 1 3 2 38 14 52 9 23 38 15 7 1 41 67 193 0 56 60 16 1 36 43 13 68 40 0 25 15 27 124 2 26 14 2 7 12 25 25 19 38 35 47 0 0 16 44 53 2 6 78 1 32 64 134 19 30 240 18 36 2 279 82 12 5 3 5 14 0 1 0 5 8 1 2 0 4 4 0 11 "D_0__Eukaryota; D_1__Opisthokonta; D_2__Nucletmycea; D_3__…
VTX00113 "OTU3.29523677608758e+32" 0 14 76 9 93 10 180 620 181 450 74 0 10 41 19 21 19 0 55 72 0 0 8 89 3 329 152 18 1 286 14 419 99 25 36 0 85 24 7 0 0 1 1 1 1 3 0 95 0 2 0 5 0 2 2 0 1 0 1 1 0 0 0 1 1 4 3 0 1 0 1 0 1 2 1 3 2 76 0 0 1 1 1 0 0 1 1 0 72 107 1 1 0 4 1 0 0 1 2 9 1 1 0 0 0 0 0 0 0 0 0 0 0 0 0 0 "D_0__Eukaryota; D_1__Opisthokonta; D_2__Nucletmycea; D_3__Fungi; D_4__Glomeromycota; D_5__…
VTX00113 "OTU1.02878895034543e+32" 24 47 12 23 15 4 136 160 232 55 37 0 6 1 5 10 2 2 4 30 152 112 0 103 0 84 47 58 0 63 31 0 22 0 24 3 406 0 4 72 411 613 144 174 28 166 616 246 0 73 81 149 0 411 814 541 161 330 50 322 100 381 0 58 28 702 953 5 191 820 701 304 15 187 1021 288 4 741 748 0 3 373 401 332 50 837 417 300 327 532 241 183 193 45 647 28 1 181 984 7 5 8 1 0 0 0 0 0 0 0 1 0 1 10 0 2 "D_0__E…
VTX00113 "OTU1.42453193713592e+32" 0 0 1 0 0 0 0 1 1 0 1 0 0 0 0 0 0 0 0 0 1 0 0 0 0 1 0 0 0 0 0 0 0 0 0 0 1 0 0 0 0 3 4 1 0 2 0 5 0 3 4 0 0 1 2 1 2 1 3 1 3 0 0 0 2 1 1 0 0 3 0 0 0 3 0 4 0 0 2 0 0 1 1 0 0 2 1 0 1 2 1 0 1 2 0 1 0 0 0 2 0 0 0 0 0 0 0 1 0 0 1 0 1 0 0 1 "D_0__Eukaryota; D_1__Opisthokonta; D_2__Nucletmycea; D_3__Fungi; D_4__Glomeromycota; D_5__Incertae Sedis; D_6__Glomeromycetes; D_7_…
VTX00113 "OTU4.14466504814559e+32" 0 0 0 0 0 1 1 2 1 0 0 0 0 0 0 0 1 0 0 0 4 0 0 0 0 0 0 0 0 0 1 0 0 0 0 0 1 0 0 0 2 4 3 1 4 0 1 1 0 3 0 1 0 1 3 0 1 2 2 0 2 0 0 2 1 0 1 0 5 5 0 0 0 0 0 2 0 1 0 0 0 1 0 0 1 0 3 0 3 1 2 0 0 3 1 2 0 2 0 0 0 0 0 0 0 0 0 0 0 0 0 0 0 1 0 2 "D_0__Eukaryota; D_1__Opisthokonta; D_2__Nucletmycea; D_3__Fungi; D_4__Glomeromycota; D_5__Incertae Sedis; D_6__Glomeromycetes; D_7_…
VTX00113 "OTU9.40153756550384e+32" 0 0 0 0 0 0 0 1 0 0 0 0 0 0 0 0 0 0 0 0 0 0 0 0 0 0 0 0 0 0 0 0 0 0 0 0 0 0 0 0 0 0 0 0 2 1 0 0 0 0 0 0 0 0 0 1 0 0 1 0 0 1 0 0 0 0 0 0 0 0 0 0 0 0 0 1 0 0 0 0 0 0 0 2 0 0 0 0 0 0 0 1 0 0 0 0 0 0 0 0 1 0 0 0 0 0 0 0 0 0 0 0 0 0 0 0 "D_0__Eukaryota; D_1__Opisthokonta; D_2__Nucletmycea; D_3__Fungi; D_4__Glomeromycota; D_5__Incertae Sedis; D_6__Glomeromycetes; D_7_…
VTX00113 "OTU2.66799695597474e+32" 4 1 7 2 0 2 11 7 2 0 2 0 0 1 0 1 10 0 1 5 17 0 0 1 0 23 0 1 1 1 1 0 1 1 5 0 9 3 0 0 6 23 17 0 7 13 17 9 0 11 13 9 0 5 11 6 8 5 13 3 6 2 0 24 4 7 9 8 26 20 4 3 1 12 8 14 10 4 7 0 0 2 15 4 0 2 18 4 19 21 10 4 8 10 6 15 0 14 6 4 2 2 1 1 0 0 0 0 0 1 1 0 1 0 0 1 "D_0__Eukaryota; D_1__Opisthokonta; D_2__Nucletmycea; D_3__Fungi; D_4__Glomeromycota; D_5__Incertae Sedis;…
VTX00113 "OTU7.25425959398279e+32" 1 0 0 0 0 0 0 0 0 1 0 0 0 0 0 0 0 0 0 1 1 0 0 0 0 3 0 0 0 0 0 0 0 0 0 0 1 0 0 0 1 1 1 1 0 1 0 3 0 0 0 1 0 2 0 1 0 0 1 0 0 0 0 0 0 2 1 1 1 1 1 2 0 0 1 1 0 1 0 0 0 0 1 1 0 0 0 0 4 3 0 0 0 0 0 1 0 1 0 0 0 0 0 0 0 0 0 0 1 0 0 0 1 0 0 0 "D_0__Eukaryota; D_1__Opisthokonta; D_2__Nucletmycea; D_3__Fungi; D_4__Glomeromycota; D_5__Incertae Sedis; D_6__Glomeromycetes; D_7_…
VTX00114 "OTU9.82619686776584e+32" 1 0 1 0 0 1 4 2 0 0 0 0 0 0 0 0 3 0 0 0 1 1 0 0 0 1 0 0 0 2 1 0 0 0 0 0 1 0 0 0 2 13 2 1 16 8 1 0 0 1 1 4 0 6 2 2 1 0 4 0 0 0 0 1 0 0 0 0 0 1 1 0 0 0 2 0 1 0 0 0 0 0 0 0 0 0 0 0 0 1 1 0 0 1 1 0 0 1 0 0 0 0 0 0 0 0 0 1 0 0 0 0 0 0 0 1 "D_0__Eukaryota; D_1__Opisthokonta; D_2__Nucletmycea; D_3__Fungi; D_4__Glomeromycota; D_5__Incertae Sedis; D_6__Glomeromycetes; D_…
VTX00114 "OTU6.48798489446065e+31" 7 4 12 6 9 5 7 38 13 7 76 2 9 1 0 0 159 3 3 10 76 12 0 23 0 7 0 4 0 11 22 6 2 0 143 0 5 6 0 1 27 82 135 8 232 78 210 26 0 104 290 24 0 33 30 34 98 99 70 39 28 10 8 67 19 46 220 237 493 251 21 7 33 56 159 49 156 6 112 4 7 38 46 189 6 37 298 41 170 232 94 41 230 178 74 511 11 115 242 49 33 37 8 41 0 3 1 99 17 6 9 0 97 33 0 70 "D_0__Eukaryota; D_1__Opisthokonta; D_…
VTX00114 "OTU2.79822060337537e+32" 0 0 0 0 0 0 0 0 0 0 0 0 0 0 0 0 0 0 0 0 0 0 0 0 0 0 0 0 0 0 0 0 0 0 0 0 0 0 0 0 0 0 0 0 0 0 0 0 0 0 0 0 0 0 1 0 0 1 0 0 0 0 0 0 0 0 0 0 0 0 0 0 0 0 0 0 0 0 0 0 0 0 0 0 0 0 0 0 0 0 0 0 0 0 1 0 0 1 0 0 0 0 0 0 0 0 0 0 0 0 0 0 0 0 0 0 "D_0__Eukaryota; D_1__Opisthokonta; D_2__Nucletmycea; D_3__Fungi; D_4__Glomeromycota; D_5__Incertae Sedis; D_6__Glomeromycetes; D_7_…
VTX00115 "OTU5.02391083020345e+32" 0 6 1947 3 0 0 1235 1431 20 4 12 0 1 1 1 1 7 1 3 18 4 1 0 22 0 3614 48 25 0 1 33 1 71 1 95 1 449 4 0 0 5 12 7 0 5 2 4 35 0 2 6 2 0 4 6 2 6 2 12 1 2 2 0 5 0 2 3 8 9 17 4 3 10 7 6 4 10 14 3 0 2 3 5 2 3 4 5 1 48 33 3 3 4 3 3 3 0 3 2 114 28 4 0 0 0 1 0 9 0 8 0 1 7 1 0 1 "D_0__Eukaryota; D_1__Opisthokonta; D_2__Nucletmycea; D_3__Fungi; D_4__Glomeromycota; D_5__Incert…
VTX00115 "OTU5.02507118072561e+32" 83 980 6341 431 96 30 6406 3957 4456 443 1735 5 82 124 152 885 2025 1 261 3647 184 17 11 731 239 11704 1041 433 14 36 1195 11 237 536 754 115 4187 1041 2 5 36 147 101 11 87 58 49 6630 3 55 210 49 2 84 141 35 70 21 170 9 42 34 2 132 30 101 219 79 202 167 34 30 1541 78 69 414 869 3340 38 1 3 198 43 28 13 19 86 31 6096 6013 51 53 52 55 40 91 3 59 82 1069 6239 2080 …
VTX00125 "OTU1.47370782924568e+32" 0 0 0 1 0 0 0 0 0 0 0 0 0 1 0 0 10 0 59 0 1122 437 0 154 0 0 0 0 0 0 3 0 0 0 0 44 0 0 0 171 45 56 93 0 161 1 7 17 0 0 33 211 0 0 258 26 3 0 308 0 0 27 0 312 298 689 0 0 72 19 0 0 0 62 0 0 0 237 50 0 0 145 23 9 1 2 80 353 106 73 23 706 0 87 56 42 0 46 55 18 17 0 0 0 0 0 0 0 0 0 0 0 0 0 0 0 "D_0__Eukaryota; D_1__Opisthokonta; D_2__Nucletmycea; D_3__Fungi; D_4__Glo…
VTX00125 "OTU9.64122642124188e+32" 2 0 17 10 0 0 0 0 0 1 0 0 1 85 0 0 1 0 2 0 549 1165 0 51 0 13 0 0 0 55 1 0 0 0 0 1 1 0 24 5 100 297 114 1 356 59 39 110 544 0 42 244 0 0 309 5 1 11 272 0 173 22 389 707 14 145 1 0 1306 67 253 52 0 117 0 0 90 6 36 0 47 247 5 9 2121 40 90 3033 16 21 199 878 0 31 145 91 1 204 47 29 64 29 0 0 0 0 0 0 0 0 1 0 0 214 1 0 "D_0__Eukaryota; D_1__Opisthokonta; D_2__Nucletm…
VTX00125 "OTU8.23529971302388e+32" 0 1 6 0 0 0 0 0 0 0 0 0 0 1 0 0 0 0 0 0 85 56 0 4 0 6 0 0 0 1 0 0 0 0 0 0 1 0 1 0 12 80 27 0 76 11 1 30 17 0 6 20 0 0 46 1 0 0 82 0 18 7 20 151 0 16 0 0 139 10 25 7 0 30 0 0 7 2 2 0 1 23 0 2 55 2 13 47 5 3 28 68 0 2 19 9 0 17 2 3 20 1 0 0 0 0 0 0 0 0 0 0 0 3 0 0 "D_0__Eukaryota; D_1__Opisthokonta; D_2__Nucletmycea; D_3__Fungi; D_4__Glomeromycota; D_5__Incertae S…
VTX00125 "OTU6.97182940947414e+32" 0 0 0 0 0 0 0 0 0 0 0 0 0 0 0 0 0 0 0 0 0 0 0 0 0 0 0 0 0 0 0 0 0 0 0 0 0 0 0 0 0 1 0 0 0 1 0 0 0 0 0 0 0 0 1 0 0 0 0 0 0 0 0 0 0 0 0 0 0 0 0 0 0 0 0 0 1 0 0 0 0 1 0 0 3 0 0 0 0 0 0 1 0 0 0 0 0 0 0 0 0 0 0 0 0 0 0 0 0 0 0 0 0 0 0 0 "D_0__Eukaryota; D_1__Opisthokonta; D_2__Nucletmycea; D_3__Fungi; D_4__Glomeromycota; D_5__Incertae Sedis; D_6__Glomeromycetes; D_7_…
VTX00125 "OTU6.73243505593355e+32" 0 0 0 0 0 0 0 0 0 0 0 0 0 0 0 0 1 0 0 0 14 11 0 1 0 0 0 0 0 0 0 0 0 0 0 0 0 0 0 0 5 11 9 0 46 3 7 0 0 0 7 2 0 0 10 1 1 2 14 0 2 0 3 21 0 4 0 0 281 5 2 0 0 5 0 0 4 0 4 0 1 2 3 6 4 3 16 25 4 6 21 33 0 7 14 19 0 8 8 3 1 1 0 0 0 0 0 0 0 0 0 0 0 4 0 0 "D_0__Eukaryota; D_1__Opisthokonta; D_2__Nucletmycea; D_3__Fungi; D_4__Glomeromycota; D_5__Incertae Sedis; D_6__Glome…
VTX00130 "OTU6.35343478142261e+32" 0 0 0 0 0 1 0 0 10 0 0 0 0 0 0 0 0 5 0 0 0 0 0 0 0 0 0 0 0 0 0 0 0 8 0 0 0 3 0 0 0 0 0 0 0 0 0 0 0 2 0 0 0 0 0 3 0 0 0 0 0 0 0 0 0 0 0 0 0 0 0 0 0 0 0 0 0 0 0 0 0 0 0 0 0 0 0 0 0 0 0 0 0 0 0 0 0 0 0 0 0 0 0 0 0 0 0 0 0 0 0 0 0 0 0 0 "D_0__Eukaryota; D_1__Opisthokonta; D_2__Nucletmycea; D_3__Fungi; D_4__Glomeromycota; D_5__Incertae Sedis; D_6__Glomeromycetes; D_7…
VTX00130 "OTU1.86085737527065e+32" 0 0 0 0 0 0 0 0 0 0 0 0 0 0 0 0 0 32 0 0 0 0 0 0 0 0 0 8 16 0 0 0 0 0 0 0 0 23 0 0 0 0 0 0 0 0 0 0 0 25 0 0 1 0 0 77 0 0 0 0 0 0 0 0 0 0 0 0 0 0 0 0 0 0 0 0 0 0 0 0 0 0 0 0 0 0 0 0 0 0 0 0 0 0 0 0 0 0 0 0 0 0 0 0 0 0 0 0 0 0 0 0 0 0 0 0 "D_0__Eukaryota; D_1__Opisthokonta; D_2__Nucletmycea; D_3__Fungi; D_4__Glomeromycota; D_5__Incertae Sedis; D_6__Glomeromycetes;…
VTX00130 "OTU6.11349721192077e+32" 0 0 0 0 0 0 0 0 0 0 0 0 0 0 0 0 0 0 0 0 0 0 0 0 0 0 0 0 0 0 0 0 0 0 0 0 0 0 0 0 0 0 0 0 0 0 0 0 0 0 0 0 0 0 0 153 0 0 0 0 0 0 0 0 0 0 0 0 0 0 0 0 0 0 0 0 0 0 0 0 0 0 0 1 0 0 0 0 0 0 0 0 0 0 0 0 0 0 0 0 0 0 0 0 0 0 0 0 0 0 0 0 0 0 0 0 "D_0__Eukaryota; D_1__Opisthokonta; D_2__Nucletmycea; D_3__Fungi; D_4__Glomeromycota; D_5__Incertae Sedis; D_6__Glomeromycetes; D_…
VTX00130 "OTU7.86892599754235e+32" 0 0 0 0 0 0 0 0 0 0 0 0 0 0 0 0 0 7 0 0 0 0 0 0 0 0 0 1 0 0 0 0 0 1 0 0 0 0 0 0 0 0 0 0 0 0 0 0 0 2 0 0 0 0 0 6 0 0 0 0 0 0 0 0 0 0 0 0 0 0 0 0 0 0 0 0 0 0 0 0 0 0 0 0 0 0 0 0 0 0 0 0 0 0 0 0 0 0 0 0 0 0 0 0 0 0 0 0 0 0 0 0 0 0 0 0 "D_0__Eukaryota; D_1__Opisthokonta; D_2__Nucletmycea; D_3__Fungi; D_4__Glomeromycota; D_5__Incertae Sedis; D_6__Glomeromycetes; D_7_…
VTX00130 "OTU8.07603152914304e+32" 0 0 0 0 0 20 0 0 64 0 0 0 0 0 0 0 0 42 0 0 0 0 0 0 0 0 0 1 0 0 0 0 0 120 0 0 0 48 0 0 0 0 0 0 0 0 0 0 0 63 0 0 0 0 0 532 0 0 0 0 0 0 0 0 0 0 0 0 0 0 0 0 0 0 0 0 0 0 0 0 0 0 0 0 0 0 0 0 0 0 0 0 0 0 0 0 0 0 0 0 0 0 0 0 0 0 0 0 0 0 0 0 0 0 0 0 "D_0__Eukaryota; D_1__Opisthokonta; D_2__Nucletmycea; D_3__Fungi; D_4__Glomeromycota; D_5__Incertae Sedis; D_6__Glomeromyce…
VTX00137 "OTU4.01586579293077e+32" 0 17 0 0 0 44 81 0 0 0 0 0 0 0 0 0 0 0 0 8 0 624 0 17 0 0 0 0 1 0 0 0 0 0 1 0 39 1 0 0 0 0 1 0 0 0 0 0 6 454 1 0 0 57 57 8 3 0 0 0 427 154 0 0 0 0 0 0 20 0 0 0 0 70 0 407 0 0 0 0 0 151 23 0 1070 0 0 0 0 0 0 0 0 0 0 0 0 0 0 23 0 0 0 0 1 0 0 0 0 0 0 1 0 0 0 0 "D_0__Eukaryota; D_1__Opisthokonta; D_2__Nucletmycea; D_3__Fungi; D_4__Glomeromycota; D_5__Incertae Sedis;…
VTX00137 "OTU6.06403600670355e+32" 0 0 0 0 0 0 0 0 0 0 1 0 0 0 0 0 0 0 0 0 0 1 0 0 0 0 0 0 0 0 0 0 0 0 0 0 0 0 0 0 0 0 0 0 1 0 0 0 1 145 0 0 0 3 0 0 0 0 0 0 61 32 0 0 0 0 0 0 0 0 0 0 0 0 0 0 0 0 0 0 0 0 1 0 0 0 0 0 0 0 0 0 0 0 0 0 0 0 0 0 0 0 0 0 0 0 0 0 0 0 0 0 0 0 0 0 "D_0__Eukaryota; D_1__Opisthokonta; D_2__Nucletmycea; D_3__Fungi; D_4__Glomeromycota; D_5__Incertae Sedis; D_6__Glomeromycetes; …
VTX00137 "OTU7.54872516075199e+32" 0 13 0 0 0 0 12 0 0 0 0 0 0 0 0 0 0 0 0 0 0 212 0 24 0 0 0 0 0 0 0 0 0 0 0 0 0 0 0 0 0 0 0 0 0 0 0 0 448 111 0 0 0 15 12 29 3 0 0 0 186 23 0 0 0 0 42 0 10 0 0 35 0 0 0 38 0 0 0 0 0 53 0 0 1 0 0 0 0 0 0 0 0 0 0 0 0 0 0 26 0 0 0 0 0 0 0 0 0 0 0 0 0 0 0 0 "D_0__Eukaryota; D_1__Opisthokonta; D_2__Nucletmycea; D_3__Fungi; D_4__Glomeromycota; D_5__Incertae Sedis; D_6_…
VTX00137 "OTU1.22076405994179e+32" 0 0 0 0 0 0 0 0 0 0 0 0 0 0 0 0 0 0 0 0 0 15 0 0 0 0 0 0 0 0 0 0 0 0 0 0 0 0 0 0 0 0 0 0 0 0 0 0 0 3 0 0 0 0 0 0 0 0 0 0 0 3 0 0 0 0 0 0 0 0 0 0 0 0 0 5 0 0 0 0 0 0 0 0 0 0 0 0 0 0 0 0 0 0 0 0 0 0 0 0 0 0 0 0 0 0 0 0 0 0 0 0 0 0 0 0 "D_0__Eukaryota; D_1__Opisthokonta; D_2__Nucletmycea; D_3__Fungi; D_4__Glomeromycota; D_5__Incertae Sedis; D_6__Glomeromycetes; D_7…
VTX00140 "OTU6.60735947814342e+32" 0 0 1 0 0 0 2 0 0 0 0 0 0 0 0 0 0 0 0 2 0 65 0 27 0 0 0 0 0 0 0 0 0 0 0 0 0 0 0 0 0 0 0 0 0 0 0 0 0 253 0 0 0 14 37 2 6 0 0 0 307 1 0 0 0 0 30 0 35 0 0 1 0 0 0 306 0 0 0 0 0 105 33 0 0 0 19 0 0 0 0 117 0 0 0 0 0 0 0 14 0 0 0 0 0 0 0 0 0 0 1 0 0 0 0 486 "D_0__Eukaryota; D_1__Opisthokonta; D_2__Nucletmycea; D_3__Fungi; D_4__Glomeromycota; D_5__Incertae Sedis; D_6_…
VTX00140 "OTU9.49510754674847e+32" 0 58 45 0 91 0 20 57 0 21 1 0 3 3 2 22 0 0 1 185 0 1471 0 81 13 0 31 2 0 0 60 44 0 0 302 0 25 0 14 0 0 0 0 0 1 0 0 0 0 486 0 0 0 88 27 31 22 0 2 0 903 129 0 0 0 41 45 0 77 0 0 243 0 0 0 513 0 0 0 1 0 212 98 0 0 0 0 0 1 0 0 4 0 0 0 8 0 0 0 10 1 0 0 0 0 0 0 0 0 1 0 0 0 1 0 235 "D_0__Eukaryota; D_1__Opisthokonta; D_2__Nucletmycea; D_3__Fungi; D_4__Glomeromycota; D_…
VTX00140 "OTU2.55442425752054e+32" 0 0 14 0 3 0 3 16 0 1 0 0 0 0 0 0 0 0 0 18 0 99 0 3 0 0 4 0 0 0 3 1 0 0 16 0 6 0 0 0 0 0 0 0 0 0 0 0 0 45 0 0 1 18 4 5 5 0 0 0 69 6 0 0 0 1 3 0 7 0 0 21 0 0 0 49 0 0 0 0 0 17 22 0 0 0 0 0 0 0 0 0 0 0 0 0 1 0 0 1 0 0 0 0 0 0 0 0 0 0 0 0 0 0 0 17 "D_0__Eukaryota; D_1__Opisthokonta; D_2__Nucletmycea; D_3__Fungi; D_4__Glomeromycota; D_5__Incertae Sedis; D_6__Glomero…
VTX00140 "OTU3.8297759400384e+32" 0 0 0 0 0 0 0 0 0 0 0 0 0 0 0 0 0 0 0 0 0 2 0 0 0 0 0 0 0 0 0 0 0 0 0 0 0 0 0 0 0 0 0 0 0 0 0 0 0 0 0 0 0 0 0 0 0 0 0 0 0 0 0 0 0 0 0 0 0 0 0 0 0 0 0 0 0 0 0 0 0 0 0 0 0 0 0 0 0 0 0 0 0 0 0 0 0 0 0 0 0 0 0 0 0 0 0 0 0 0 0 0 0 0 0 0 "D_0__Eukaryota; D_1__Opisthokonta; D_2__Nucletmycea; D_3__Fungi; D_4__Glomeromycota; D_5__Incertae Sedis; D_6__Glomeromycetes; D_7__…
VTX00143 "OTU4.06453894216689e+32" 0 3 0 0 0 0 1 0 0 0 0 0 0 4 0 0 0 0 0 0 0 0 0 15 0 0 0 0 0 41 0 0 0 0 0 0 0 0 0 0 0 0 11 1 0 0 0 0 0 0 0 0 0 0 0 0 0 0 0 0 0 0 0 0 0 0 0 0 0 0 0 0 0 0 0 0 0 0 0 0 0 0 0 0 0 0 0 0 0 0 0 0 0 0 0 0 0 0 0 0 0 0 0 0 0 0 0 0 0 0 0 0 0 0 0 0 "D_0__Eukaryota; D_1__Opisthokonta; D_2__Nucletmycea; D_3__Fungi; D_4__Glomeromycota; D_5__Incertae Sedis; D_6__Glomeromycetes; D…
VTX00143 "OTU7.22494007922176e+32" 0 13 0 0 30 0 40 96 0 4 23 0 0 22 0 1 20 1 0 183 0 0 0 0 0 0 288 0 0 0 26 8 0 0 67 0 0 11 6 0 0 0 0 0 0 0 0 0 0 0 0 0 0 0 0 0 0 0 2 0 0 1 0 0 0 0 0 0 0 0 0 0 0 0 0 0 0 0 0 0 1 0 0 0 0 0 0 0 0 0 0 0 0 0 0 1 0 0 0 0 0 0 0 0 0 0 0 0 0 0 0 0 0 0 0 0 "D_0__Eukaryota; D_1__Opisthokonta; D_2__Nucletmycea; D_3__Fungi; D_4__Glomeromycota; D_5__Incertae Sedis; D_6__Glomer…
VTX00143 "OTU1.60770402512433e+32" 0 4 3 0 1 0 1 3 0 2 0 0 0 0 0 1 0 0 0 16 0 0 0 0 2 0 9 0 0 0 4 1 0 0 15 0 0 0 1 0 0 0 0 0 0 0 0 0 0 0 1 0 0 0 0 0 0 0 0 0 0 0 0 0 0 0 0 0 0 0 0 0 0 0 0 0 0 0 0 0 0 0 0 0 0 1 0 0 0 0 0 0 0 0 0 0 0 0 0 0 0 0 0 0 0 0 0 0 0 0 0 0 0 0 0 0 "D_0__Eukaryota; D_1__Opisthokonta; D_2__Nucletmycea; D_3__Fungi; D_4__Glomeromycota; D_5__Incertae Sedis; D_6__Glomeromycetes; D_…
VTX00143 "OTU5.27833788881185e+32" 21 0 0 1 0 0 0 0 0 0 0 0 0 0 0 0 2 0 0 1 0 1 0 35 1 0 0 1 0 218 0 0 0 25 0 0 0 0 2 0 1 0 309 54 0 0 0 0 0 1 2 0 0 1 1 1 0 0 0 0 31 0 0 0 0 0 0 0 0 0 0 0 0 0 0 0 0 0 0 0 0 0 0 0 0 0 0 0 6 0 0 0 0 0 0 1 0 0 0 0 0 0 0 0 0 0 0 0 0 1 0 0 0 0 0 0 "D_0__Eukaryota; D_1__Opisthokonta; D_2__Nucletmycea; D_3__Fungi; D_4__Glomeromycota; D_5__Incertae Sedis; D_6__Glomeromyce…
VTX00143 "OTU9.67493883843701e+32" 0 0 0 0 3 0 0 1 0 1 0 0 0 0 0 0 0 0 1 0 0 0 0 4 1 0 0 0 0 0 0 3 0 0 0 0 0 0 8 0 0 0 0 0 0 0 0 0 0 0 0 0 0 0 0 0 0 0 0 0 0 0 0 0 0 0 0 0 0 0 0 0 0 0 0 0 0 0 0 0 0 0 0 0 0 0 0 0 0 0 0 0 0 0 0 0 0 0 0 0 0 0 0 0 0 0 0 0 0 0 0 0 0 0 0 0 "D_0__Eukaryota; D_1__Opisthokonta; D_2__Nucletmycea; D_3__Fungi; D_4__Glomeromycota; D_5__Incertae Sedis; D_6__Glomeromycetes; D_7_…
VTX00143 "OTU7.72665247426573e+32" 0 0 0 0 0 0 0 2 0 0 0 0 0 0 0 0 0 0 0 0 0 0 0 14 0 0 0 0 0 0 0 0 0 1 0 0 0 0 0 0 0 0 4 0 0 0 0 0 0 0 1 0 0 0 0 0 0 0 0 0 3 0 0 0 0 0 0 0 0 0 0 0 0 0 0 0 0 0 0 0 0 0 0 0 0 0 0 0 0 0 0 0 0 0 0 0 0 0 0 0 0 0 0 0 0 0 0 0 0 0 0 0 0 0 0 0 "D_0__Eukaryota; D_1__Opisthokonta; D_2__Nucletmycea; D_3__Fungi; D_4__Glomeromycota; D_5__Incertae Sedis; D_6__Glomeromycetes; D_7…
VTX00143 "OTU3.18672733861884e+32" 0 0 2 3 11 0 9 34 0 5 1 0 0 1 0 0 3 0 0 8 0 0 0 49 1 0 10 1 0 52 1 0 0 0 8 0 0 0 3 0 1 0 6 3 0 0 0 0 1 1 5 0 0 0 8 6 3 0 0 0 20 0 1 0 0 0 0 0 0 0 0 0 2 1 0 0 0 0 0 0 0 0 0 0 0 0 1 0 0 0 1 0 0 0 0 0 0 0 0 15 0 0 0 0 0 0 0 0 0 1 0 0 0 0 0 0 "D_0__Eukaryota; D_1__Opisthokonta; D_2__Nucletmycea; D_3__Fungi; D_4__Glomeromycota; D_5__Incertae Sedis; D_6__Glomeromycete…
VTX00143 "OTU6.39793765375497e+32" 0 52 70 0 86 0 0 122 0 11 1 0 4 16 0 0 0 0 0 363 0 0 1 24 0 0 47 0 1 0 83 95 0 0 791 0 0 1 76 0 0 0 0 0 0 0 0 0 1 0 0 0 0 0 0 0 0 0 1 0 0 0 0 0 1 0 0 0 0 0 0 0 0 0 0 0 0 0 0 0 0 0 0 0 0 0 0 0 1 0 0 0 0 0 0 1 0 0 0 0 0 0 0 0 0 0 0 0 1 0 0 0 0 0 0 0 "D_0__Eukaryota; D_1__Opisthokonta; D_2__Nucletmycea; D_3__Fungi; D_4__Glomeromycota; D_5__Incertae Sedis; D_6__Glom…
VTX00143 "OTU7.38448905196982e+31" 0 0 0 0 0 0 0 0 0 0 0 0 0 0 0 0 0 0 0 0 0 0 0 1 0 0 0 0 0 1 0 0 0 0 0 0 0 0 0 0 0 0 2 0 0 0 0 0 0 0 0 0 0 1 0 0 0 0 0 0 0 0 0 0 0 0 0 0 0 0 0 0 0 0 0 0 0 0 0 0 0 0 0 0 0 0 0 0 0 0 0 0 0 0 0 0 0 0 0 0 0 0 0 0 0 0 0 0 0 0 0 0 0 0 0 0 "D_0__Eukaryota; D_1__Opisthokonta; D_2__Nucletmycea; D_3__Fungi; D_4__Glomeromycota; D_5__Incertae Sedis; D_6__Glomeromycetes; D_7_…
VTX00143 "OTU2.9067776071609e+32" 0 18 1 0 33 0 40 134 0 0 0 0 3 2 0 0 35 0 0 20 0 24 0 233 22 0 0 1 0 142 2 2 0 0 37 0 0 0 0 0 0 0 27 23 0 0 0 0 0 0 17 0 0 4 5 18 1 0 52 0 4 0 0 0 0 0 0 0 0 0 0 0 0 0 0 0 0 0 0 0 0 0 0 0 0 0 0 0 0 0 19 0 0 0 0 2 0 0 0 27 0 0 0 0 0 0 0 0 0 0 0 0 0 0 0 0 "D_0__Eukaryota; D_1__Opisthokonta; D_2__Nucletmycea; D_3__Fungi; D_4__Glomeromycota; D_5__Incertae Sedis; D_6__…
VTX00143 "OTU6.3852408659621e+32" 0 12 0 0 0 0 2 21 0 6 4 0 0 1 1 0 1 0 1 47 0 0 0 4 3 0 9 0 0 0 5 25 0 0 17 0 1 0 26 0 0 0 21 7 0 0 0 0 0 0 0 0 0 2 0 0 0 0 0 0 0 0 0 0 0 0 0 0 0 0 0 0 0 0 0 0 1 0 0 0 0 0 0 0 0 0 1 0 0 0 0 0 0 0 0 0 0 0 0 0 0 0 0 0 0 0 0 0 0 0 0 0 0 0 0 0 "D_0__Eukaryota; D_1__Opisthokonta; D_2__Nucletmycea; D_3__Fungi; D_4__Glomeromycota; D_5__Incertae Sedis; D_6__Glomeromycetes…
VTX00143 "OTU3.21729044601522e+32" 0 0 5 0 2 0 0 9 0 0 0 0 1 0 0 1 0 0 1 19 0 0 1 1 0 0 0 0 0 1 0 4 0 0 11 0 0 0 6 0 0 0 0 0 2 0 0 0 1 0 3 0 2 0 0 1 0 0 0 0 5 0 0 0 0 0 0 0 0 0 0 0 0 0 0 0 0 0 0 0 0 0 0 0 0 0 0 0 0 0 0 0 0 0 0 48 0 0 0 0 0 0 0 0 0 0 0 0 0 3 0 0 0 0 0 0 "D_0__Eukaryota; D_1__Opisthokonta; D_2__Nucletmycea; D_3__Fungi; D_4__Glomeromycota; D_5__Incertae Sedis; D_6__Glomeromycetes; D…
VTX00143 "OTU6.7634588809878e+32" 28 7 14 1 91 0 50 218 0 91 0 0 0 2 0 0 21 0 0 6 0 0 0 247 0 1 1 8 0 76 0 11 0 0 42 0 0 0 2 0 0 0 3 1 0 0 0 0 1 0 62 0 1 0 0 69 13 0 0 0 6 0 0 0 0 0 0 0 0 0 0 0 0 0 0 0 1 0 0 0 0 0 0 0 0 0 17 0 3 0 15 0 0 0 0 0 0 0 0 1 0 0 0 0 0 0 0 1 2 3 0 0 0 4 0 0 "D_0__Eukaryota; D_1__Opisthokonta; D_2__Nucletmycea; D_3__Fungi; D_4__Glomeromycota; D_5__Incertae Sedis; D_6__Glo…
VTX00143 "OTU9.86650073991697e+32" 0 49 56 0 130 0 48 611 0 140 0 0 123 124 0 3 49 0 53 1081 0 0 0 49 22 0 12 0 0 9 34 276 0 0 416 0 1 0 600 0 0 0 1 4 34 0 0 0 4 0 14 0 4 0 0 1 0 0 0 2 18 2 0 0 0 0 2 0 0 0 0 0 0 1 0 0 2 0 0 2 0 0 0 0 0 0 0 0 8 0 0 1 0 0 1 363 4 0 0 1 0 0 0 0 0 0 0 0 1 16 0 0 1 5 1 0 "D_0__Eukaryota; D_1__Opisthokonta; D_2__Nucletmycea; D_3__Fungi; D_4__Glomeromycota; D_5__Incerta…
VTX00143 "OTU4.64970126159102e+32" 0 144 104 0 184 0 61 413 0 144 69 0 163 218 0 33 12 0 107 439 0 2 0 53 150 0 17 0 0 11 81 334 0 0 1024 0 41 0 366 1 0 1 2 1 0 0 0 0 0 0 3 1 1 2 1 2 0 0 3 0 1 0 0 0 0 0 0 0 0 0 0 0 0 1 0 0 0 0 0 0 0 0 0 0 0 0 0 0 0 0 2 0 0 0 0 0 0 0 0 3 0 0 0 0 0 0 0 0 1 1 0 0 0 0 0 0 "D_0__Eukaryota; D_1__Opisthokonta; D_2__Nucletmycea; D_3__Fungi; D_4__Glomeromycota; D_5__Incer…
VTX00143 "OTU6.99838753175356e+32" 15 33 53 93 67 14 254 993 0 268 28 0 6 91 12 0 233 0 2 614 0 81 0 758 81 32 116 99 0 845 30 254 1 29 270 0 26 9 378 0 8 0 436 65 0 0 0 0 7 26 233 0 3 15 214 252 58 1 124 40 522 6 1 0 0 1 30 1 1 1 0 0 2 37 0 0 0 0 0 2 0 0 1 0 0 0 111 0 84 0 1 3 0 0 1 0 1 0 0 265 0 0 0 1 0 0 0 0 2 19 2 0 1 4 1 7 "D_0__Eukaryota; D_1__Opisthokonta; D_2__Nucletmycea; D_3__Fungi; D_4…
VTX00143 "OTU9.71631682397017e+32" 0 1 0 0 1 0 1 13 0 17 0 0 0 0 0 0 0 0 0 3 0 0 0 0 0 0 3 0 0 0 1 130 0 0 30 0 0 0 171 0 0 0 0 0 0 0 0 0 0 0 0 0 1 0 0 0 0 1 0 0 0 0 0 0 0 0 0 0 0 0 0 0 0 0 0 0 0 0 0 0 0 0 0 0 0 0 0 0 0 0 0 0 0 0 1 0 0 0 0 0 0 0 0 0 0 0 0 0 0 0 0 0 0 0 0 0 "D_0__Eukaryota; D_1__Opisthokonta; D_2__Nucletmycea; D_3__Fungi; D_4__Glomeromycota; D_5__Incertae Sedis; D_6__Glomeromycete…
VTX00143 "OTU4.60951074097547e+32" 0 0 0 0 0 0 0 1 0 1 0 0 0 0 0 0 0 0 0 2 0 0 0 1 0 0 0 0 0 0 0 7 0 0 0 0 0 0 0 0 0 0 0 0 0 0 0 0 0 0 0 0 0 0 0 0 0 0 0 0 0 0 0 0 0 0 0 0 0 0 0 0 0 0 0 0 0 0 0 0 0 0 0 0 0 0 0 0 0 0 0 0 0 0 0 0 0 0 0 0 0 0 0 0 0 0 0 0 0 0 0 0 0 0 0 0 "D_0__Eukaryota; D_1__Opisthokonta; D_2__Nucletmycea; D_3__Fungi; D_4__Glomeromycota; D_5__Incertae Sedis; D_6__Glomeromycetes; D_7_…
VTX00143 "OTU7.89284423169576e+32" 0 0 0 0 0 0 0 1 0 0 0 0 0 0 0 0 0 0 0 1 0 0 0 0 0 0 5 0 0 0 0 0 0 0 1 0 0 0 0 0 0 0 0 0 0 0 0 0 0 0 0 0 0 0 0 0 0 0 0 0 0 0 0 0 0 0 0 0 0 0 0 0 0 0 0 0 0 0 0 0 0 0 0 0 0 0 0 0 0 0 0 0 0 0 0 0 0 0 0 0 0 0 0 0 0 0 0 0 0 0 0 0 0 0 0 0 "D_0__Eukaryota; D_1__Opisthokonta; D_2__Nucletmycea; D_3__Fungi; D_4__Glomeromycota; D_5__Incertae Sedis; D_6__Glomeromycetes; D_7_…
VTX00143 "OTU6.93186942054432e+32" 0 0 0 1 2 0 1 2 0 1 0 0 0 0 0 0 0 0 0 0 0 0 0 15 0 0 0 2 0 11 0 3 0 1 0 0 0 0 3 0 1 0 0 0 0 0 0 0 0 0 0 0 0 0 0 1 0 0 0 0 3 0 0 0 0 0 0 0 0 0 0 0 0 0 0 0 0 0 0 0 0 0 0 0 0 0 0 0 0 0 0 0 0 0 0 0 0 0 0 1 0 0 0 0 0 0 0 0 0 0 0 0 0 0 0 0 "D_0__Eukaryota; D_1__Opisthokonta; D_2__Nucletmycea; D_3__Fungi; D_4__Glomeromycota; D_5__Incertae Sedis; D_6__Glomeromycetes; D_…
VTX00143 "OTU8.01359412531585e+32" 0 0 0 0 2 0 0 1 0 3 0 0 0 0 0 0 0 0 1 0 0 0 0 1 0 0 0 0 0 0 0 3 0 0 0 0 0 0 6 0 0 0 0 0 0 0 0 0 0 0 1 0 0 0 0 0 0 0 0 0 1 0 0 0 0 0 0 0 0 0 0 0 0 0 0 0 0 0 0 0 0 0 0 0 0 0 0 0 0 0 0 0 0 0 0 1 0 0 0 0 0 0 0 0 0 0 0 0 0 0 0 0 0 0 0 0 "D_0__Eukaryota; D_1__Opisthokonta; D_2__Nucletmycea; D_3__Fungi; D_4__Glomeromycota; D_5__Incertae Sedis; D_6__Glomeromycetes; D_7_…
VTX00143 "OTU7.13890880277013e+32" 0 0 1 0 0 0 0 7 0 11 0 0 0 0 0 0 0 0 0 17 0 0 0 0 0 0 0 0 0 0 0 12 0 0 1 0 1 0 32 0 0 0 0 0 0 0 0 0 0 0 0 0 0 0 0 0 0 0 0 0 1 0 0 0 0 0 0 0 0 0 0 0 0 0 0 0 0 0 0 0 0 0 0 0 0 0 0 0 0 0 0 0 0 0 0 0 0 0 0 0 0 0 0 0 0 0 0 0 0 3 1 0 0 0 0 0 "D_0__Eukaryota; D_1__Opisthokonta; D_2__Nucletmycea; D_3__Fungi; D_4__Glomeromycota; D_5__Incertae Sedis; D_6__Glomeromycetes; …
VTX00143 "OTU2.69946343413743e+31" 0 0 0 0 0 0 0 1 0 0 0 0 0 0 0 0 0 0 0 0 0 0 0 1 0 0 0 0 0 0 0 0 0 0 0 0 0 0 0 0 0 0 0 1 0 0 0 0 0 0 0 0 0 0 0 0 0 0 0 0 0 0 0 0 0 0 0 0 0 0 0 0 0 0 0 0 0 0 0 0 0 0 0 0 0 0 0 0 0 0 0 0 0 0 0 0 0 0 0 0 0 0 0 0 0 0 0 0 0 0 0 0 0 0 0 0 "D_0__Eukaryota; D_1__Opisthokonta; D_2__Nucletmycea; D_3__Fungi; D_4__Glomeromycota; D_5__Incertae Sedis; D_6__Glomeromycetes; D_7_…
VTX00155 "OTU3.30839691726684e+32" 0 0 1 19 764 89 0 0 0 0 0 0 0 0 1 0 8 4 0 0 0 0 4 0 0 0 0 74 0 64 0 8 0 0 0 0 0 0 0 0 0 0 0 0 0 0 0 0 0 0 0 0 1 0 0 0 0 0 1 0 0 1 0 0 0 0 0 0 0 0 0 0 0 0 0 0 0 0 0 0 0 0 0 0 0 0 0 0 0 0 0 0 0 0 1 0 0 0 0 0 0 0 0 0 0 0 0 0 0 0 0 0 0 0 0 0 "D_0__Eukaryota; D_1__Opisthokonta; D_2__Nucletmycea; D_3__Fungi; D_4__Glomeromycota; D_5__Incertae Sedis; D_6__Glomeromycetes…
VTX00155 "OTU1.83549724858022e+32" 0 0 0 0 1 1 0 0 0 0 0 0 0 0 0 0 0 0 0 0 0 0 0 0 0 0 0 0 0 1 0 0 0 0 0 0 0 0 0 0 0 0 0 0 0 0 0 0 0 0 0 0 0 0 0 0 0 0 0 0 0 0 0 0 0 0 0 0 0 0 0 0 0 0 0 0 0 0 0 0 0 0 0 0 0 0 0 0 0 0 0 0 0 0 0 0 0 0 0 0 0 0 0 0 0 0 0 0 0 0 0 0 0 0 0 0 "D_0__Eukaryota; D_1__Opisthokonta; D_2__Nucletmycea; D_3__Fungi; D_4__Glomeromycota; D_5__Incertae Sedis; D_6__Glomeromycetes; D_7_…
VTX00155 "OTU8.69243610259819e+32" 0 0 0 1 10 5 0 0 0 0 0 0 0 0 0 0 0 0 0 0 0 0 0 0 0 0 0 4 0 0 0 0 0 0 0 0 0 0 0 0 0 0 0 0 0 0 0 0 0 0 0 0 0 0 0 0 0 0 0 0 0 0 0 0 0 0 0 0 0 0 0 0 0 0 0 0 0 0 0 0 0 0 0 0 0 0 0 0 0 0 0 0 0 0 0 0 0 0 0 0 0 0 0 0 0 0 0 0 0 0 0 0 0 0 0 0 "D_0__Eukaryota; D_1__Opisthokonta; D_2__Nucletmycea; D_3__Fungi; D_4__Glomeromycota; D_5__Incertae Sedis; D_6__Glomeromycetes; D_7…
VTX00155 "OTU6.49692318936882e+32" 0 0 0 0 8 0 0 0 0 0 0 0 0 0 0 0 1 0 0 0 0 0 0 0 0 0 0 0 0 2 0 0 0 0 0 0 0 0 0 0 0 0 0 0 0 0 0 0 0 0 0 0 0 0 0 0 0 0 0 0 0 0 0 0 0 0 0 0 0 0 0 0 0 0 0 0 0 0 0 0 0 0 0 0 0 0 0 0 0 0 0 0 0 0 0 0 0 0 0 0 0 0 0 0 0 0 0 0 0 0 0 0 0 0 0 0 "D_0__Eukaryota; D_1__Opisthokonta; D_2__Nucletmycea; D_3__Fungi; D_4__Glomeromycota; D_5__Incertae Sedis; D_6__Glomeromycetes; D_7_…
VTX00155 "OTU9.41826723152186e+32" 0 0 0 0 1 0 0 0 0 0 0 0 0 0 0 0 0 0 0 0 0 0 0 0 0 0 0 0 0 0 0 0 0 0 0 0 0 0 0 0 0 0 0 0 0 0 0 0 0 0 0 0 0 0 0 0 0 0 0 0 0 0 0 0 0 0 0 0 0 0 0 0 0 0 0 0 0 0 0 0 0 0 0 0 0 0 0 0 0 0 0 0 0 0 0 0 0 0 0 0 0 0 0 0 0 0 0 0 0 0 0 0 0 0 0 0 "D_0__Eukaryota; D_1__Opisthokonta; D_2__Nucletmycea; D_3__Fungi; D_4__Glomeromycota; D_5__Incertae Sedis; D_6__Glomeromycetes; D_7_…
VTX00156 "OTU2.06470266375621e+32" 0 0 0 0 0 0 0 0 0 0 0 0 0 0 0 0 0 0 0 0 0 0 0 0 0 0 0 0 0 0 0 0 0 0 0 0 0 0 0 0 0 0 0 0 0 0 0 0 0 0 0 0 0 0 1 0 0 0 1 0 0 2 0 0 0 0 0 0 0 0 0 0 0 0 0 0 0 0 0 0 0 0 0 0 0 0 0 0 0 0 0 0 0 0 0 0 0 0 0 0 0 0 0 0 0 0 0 0 0 0 0 0 0 0 0 0 "D_0__Eukaryota; D_1__Opisthokonta; D_2__Nucletmycea; D_3__Fungi; D_4__Glomeromycota; D_5__Incertae Sedis; D_6__Glomeromycetes; D_7_…
VTX00156 "OTU7.33094634211387e+32" 0 0 0 0 0 0 0 0 0 0 0 0 0 0 0 0 0 0 0 0 0 0 0 0 0 0 0 0 0 0 0 0 0 0 0 0 0 0 0 0 0 0 0 0 0 0 0 0 0 0 0 0 0 0 0 0 0 0 3 0 0 0 0 0 0 0 0 0 0 0 0 0 0 0 0 0 0 0 0 0 0 0 0 0 0 0 0 0 0 0 0 0 0 0 0 0 0 0 0 0 0 0 0 0 0 0 0 0 0 0 0 0 0 0 0 0 "D_0__Eukaryota; D_1__Opisthokonta; D_2__Nucletmycea; D_3__Fungi; D_4__Glomeromycota; D_5__Incertae Sedis; D_6__Glomeromycetes; D_7_…
VTX00156 "OTU1.74466346422648e+32" 0 0 0 0 0 0 0 0 0 0 0 0 0 0 0 0 0 0 0 2 0 0 0 0 0 0 0 0 0 0 0 0 0 0 1 0 0 0 0 0 0 0 0 0 2 0 0 0 0 0 0 0 0 0 0 0 0 0 394 0 1 301 0 0 0 0 0 1 0 0 0 1 0 0 0 0 0 0 0 0 0 0 0 0 0 0 0 0 0 0 0 212 0 0 76 0 0 0 0 0 0 0 0 0 0 0 0 0 0 0 0 0 0 0 0 0 "D_0__Eukaryota; D_1__Opisthokonta; D_2__Nucletmycea; D_3__Fungi; D_4__Glomeromycota; D_5__Incertae Sedis; D_6__Glomeromycete…
VTX00156 "OTU1.7066693526974e+32" 0 0 0 0 0 0 0 0 0 0 0 0 0 0 0 0 0 0 0 1 0 0 0 0 0 0 0 0 0 0 0 0 0 0 0 0 0 0 0 0 0 0 0 0 0 0 0 0 0 0 0 0 0 0 0 0 0 0 7 0 0 7 0 0 0 0 0 0 0 0 0 0 0 0 0 0 0 0 0 0 0 0 0 0 0 0 0 0 0 0 0 17 0 0 2 0 0 0 0 0 0 0 0 0 0 0 0 0 0 0 0 0 0 0 0 0 "D_0__Eukaryota; D_1__Opisthokonta; D_2__Nucletmycea; D_3__Fungi; D_4__Glomeromycota; D_5__Incertae Sedis; D_6__Glomeromycetes; D_7_…
VTX00156 "OTU5.41619971669231e+32" 0 0 0 0 0 0 0 1 0 0 0 0 0 0 0 0 0 0 0 2 0 0 0 0 1 0 2 0 0 0 0 0 0 0 0 0 0 0 0 0 0 0 0 1 2 0 0 0 0 0 0 0 0 0 0 0 0 0 251 0 2 105 0 0 0 0 0 0 0 0 0 0 0 0 0 0 0 0 0 1 0 0 0 0 0 0 0 0 0 0 0 2 0 0 90 0 0 0 0 0 0 0 0 0 0 0 0 1 0 2 0 0 0 0 0 0 "D_0__Eukaryota; D_1__Opisthokonta; D_2__Nucletmycea; D_3__Fungi; D_4__Glomeromycota; D_5__Incertae Sedis; D_6__Glomeromycetes;…
VTX00160 "OTU9.35583847286985e+32" 0 0 14 17 763 159 0 1 0 0 0 0 0 0 0 0 1 3 0 0 84 57 19 2 0 0 0 101 0 45 0 15 0 0 0 0 0 0 0 0 30 0 4 0 0 1 0 1 4 199 33 179 0 49 290 0 6 18 0 0 132 2 0 0 3 4 3 0 38 0 2 79 2 0 0 0 0 413 0 0 0 3 0 0 0 0 0 0 69 59 184 4 0 0 0 1 1 0 0 0 0 0 0 0 0 0 0 1 0 0 1 0 0 1 0 0 "D_0__Eukaryota; D_1__Opisthokonta; D_2__Nucletmycea; D_3__Fungi; D_4__Glomeromycota; D_5__Incertae…
VTX00160 "OTU2.84429085508432e+32" 0 0 0 0 1 0 0 0 0 0 0 0 0 0 0 0 0 0 0 0 2 3 0 0 0 0 0 0 0 0 0 0 0 0 0 0 0 0 0 0 0 0 0 0 1 0 0 0 0 5 0 3 0 1 5 0 0 2 0 0 1 2 0 0 0 3 0 0 0 0 0 3 0 0 0 0 0 0 0 0 0 1 0 0 0 0 0 0 1 1 5 0 0 1 2 0 0 0 0 0 0 0 0 0 0 0 0 0 0 0 0 0 0 0 0 0 "D_0__Eukaryota; D_1__Opisthokonta; D_2__Nucletmycea; D_3__Fungi; D_4__Glomeromycota; D_5__Incertae Sedis; D_6__Glomeromycetes; D_7_…
VTX00160 "OTU1.5892318737102e+32" 0 1 0 0 0 0 0 0 0 0 0 0 0 0 0 0 0 0 0 0 1 1 0 2 0 0 0 0 0 0 0 0 0 0 0 0 0 0 0 0 1 0 3 1 2 0 0 0 15 0 0 0 0 1 4 0 0 1 0 0 3 0 0 0 1 4 4 0 1 0 11 0 0 2 0 0 0 4 0 0 0 0 0 0 0 0 1 0 1 2 6 10 0 1 0 0 0 0 0 0 0 0 0 0 0 0 0 0 0 0 0 0 0 0 0 0 "D_0__Eukaryota; D_1__Opisthokonta; D_2__Nucletmycea; D_3__Fungi; D_4__Glomeromycota; D_5__Incertae Sedis; D_6__Glomeromycetes; D_…
VTX00160 "OTU2.63952422153896e+32" 0 0 0 0 3 0 0 0 0 0 0 0 0 0 0 0 0 0 0 0 3 44 0 13 0 0 0 0 0 3 0 0 0 0 0 0 0 0 0 0 10 1 1 10 0 1 0 2 0 9 0 3 0 21 38 0 1 8 1 0 11 5 0 1 1 19 47 0 1 2 66 8 0 0 0 1 0 103 13 0 0 8 0 0 0 0 1 0 2 1 19 21 0 1 37 0 0 0 3 0 0 0 0 0 0 0 0 0 0 0 0 0 0 0 0 0 "D_0__Eukaryota; D_1__Opisthokonta; D_2__Nucletmycea; D_3__Fungi; D_4__Glomeromycota; D_5__Incertae Sedis; D_6__Glom…
VTX00160 "OTU5.18015726761202e+32" 0 0 0 0 0 0 0 0 0 0 0 0 0 0 0 0 0 0 0 0 0 0 0 0 0 0 0 0 0 0 0 0 0 0 0 0 0 0 0 0 0 0 0 0 0 1 0 0 0 0 0 0 0 0 0 0 0 0 0 0 0 0 0 1 0 0 0 0 0 0 0 0 0 0 0 0 0 0 0 0 0 0 0 0 0 0 0 0 0 0 0 0 0 0 0 0 1 0 0 0 0 0 0 0 0 0 0 0 0 0 0 0 0 0 0 0 "D_0__Eukaryota; D_1__Opisthokonta; D_2__Nucletmycea; D_3__Fungi; D_4__Glomeromycota; D_5__Incertae Sedis; D_6__Glomeromycetes; D_7_…
VTX00160 "OTU5.83021747292602e+32" 0 2 0 0 0 9 0 32 6 4 0 2 0 0 0 0 1 0 0 0 250 118 0 35 2 0 0 2 0 11 0 1 0 0 0 0 0 0 0 0 36 35 164 6 70 48 5 18 107 128 3 67 0 154 411 1 29 11 76 0 198 17 6 78 130 42 62 0 14 24 98 30 0 3 0 3 0 177 23 0 0 13 5 5 0 0 4 0 115 69 135 99 0 40 30 20 51 0 2 27 3 0 39 14 24 0 0 0 0 0 56 0 0 0 0 0 "D_0__Eukaryota; D_1__Opisthokonta; D_2__Nucletmycea; D_3__Fungi; D_4__Glom…
VTX00160 "OTU2.12085516310811e+32" 0 24 1 0 17 110 0 126 61 14 0 51 0 0 30 0 12 1 0 0 1458 1814 0 643 74 0 0 20 17 68 0 9 0 0 1 0 1 0 0 2 249 123 796 136 273 201 37 76 2171 1494 22 608 0 856 2535 0 147 160 344 0 2564 163 100 493 535 379 918 0 221 135 936 344 2 10 0 51 0 1514 265 0 0 189 19 40 1 0 89 1 498 308 1481 1552 0 458 311 221 549 0 40 188 20 1 309 149 127 0 1 0 0 0 423 0 0 1 0 0 "D_0__Euka…
VTX00160 "OTU7.71715449183048e+32" 0 0 0 0 0 0 0 0 0 1 0 0 0 0 0 0 0 0 0 0 2 8 0 3 0 0 0 0 0 0 0 0 0 0 0 0 0 0 0 0 0 0 3 1 1 1 0 1 2 2 0 2 0 7 17 0 2 1 0 0 6 2 0 3 5 0 4 0 0 0 8 1 0 0 0 0 0 14 0 0 0 2 0 0 0 0 0 0 0 1 9 9 0 0 5 0 1 0 0 2 0 0 0 0 1 0 0 0 0 0 2 0 0 0 0 0 "D_0__Eukaryota; D_1__Opisthokonta; D_2__Nucletmycea; D_3__Fungi; D_4__Glomeromycota; D_5__Incertae Sedis; D_6__Glomeromycetes; D_…
VTX00160 "OTU6.57154892880104e+32" 0 0 0 0 0 0 0 6 11 1 0 0 0 0 0 0 3 0 0 0 39 29 0 6 7 0 0 0 0 0 0 0 0 0 0 0 0 0 0 0 7 8 49 3 47 8 3 2 3 111 1 5 0 29 64 0 6 16 27 0 95 0 2 10 32 8 105 0 71 12 17 5 1 0 0 2 0 19 21 0 0 7 0 10 0 0 14 1 52 32 142 77 1 71 10 59 2 0 5 17 2 0 3 4 1 0 0 0 0 0 4 0 0 0 0 0 "D_0__Eukaryota; D_1__Opisthokonta; D_2__Nucletmycea; D_3__Fungi; D_4__Glomeromycota; D_5__Incertae …
VTX00160 "OTU9.74709255502898e+32" 0 1 0 0 0 0 0 2 0 0 0 0 0 0 0 0 0 0 1 0 2 17 0 6 0 0 0 0 0 0 0 0 0 0 0 0 0 0 0 0 8 0 1 5 0 0 0 1 0 3 0 4 0 6 18 0 0 2 0 0 8 5 0 0 0 4 19 0 0 0 25 2 0 0 0 0 0 23 4 0 0 2 0 0 0 0 1 0 2 3 8 17 0 0 5 0 0 0 1 0 0 0 0 0 0 0 0 0 0 0 0 0 0 0 0 0 "D_0__Eukaryota; D_1__Opisthokonta; D_2__Nucletmycea; D_3__Fungi; D_4__Glomeromycota; D_5__Incertae Sedis; D_6__Glomeromycetes…
VTX00160 "OTU2.15574945814041e+32" 0 0 0 0 0 0 0 0 0 0 0 0 0 0 0 0 0 0 0 0 0 0 0 1 0 0 0 0 0 0 0 0 0 0 0 0 0 0 0 0 0 0 0 0 0 0 0 0 0 0 0 0 0 0 0 0 0 0 0 0 0 0 0 0 0 0 0 0 0 0 0 0 0 0 0 0 0 0 0 0 0 0 0 0 0 0 0 0 0 0 0 0 0 0 0 0 0 0 0 0 0 0 0 0 0 0 0 0 0 0 0 0 0 0 0 0 "D_0__Eukaryota; D_1__Opisthokonta; D_2__Nucletmycea; D_3__Fungi; D_4__Glomeromycota; D_5__Incertae Sedis; D_6__Glomeromycetes; D_7_…
VTX00165 "OTU6.09162564366294e+32" 0 0 0 0 0 0 0 0 0 5 0 0 0 0 0 1 0 0 0 0 0 1 0 2 0 0 0 0 0 0 0 0 0 0 0 0 0 0 0 0 0 0 0 0 0 0 0 0 0 0 0 0 0 0 0 0 0 0 0 0 0 0 0 0 0 0 0 0 0 0 0 0 0 0 0 0 0 0 0 0 0 0 0 0 0 0 0 0 0 0 0 0 0 0 0 0 0 0 0 0 0 0 0 0 0 0 0 0 0 0 0 0 0 0 0 0 "D_0__Eukaryota; D_1__Opisthokonta; D_2__Nucletmycea; D_3__Fungi; D_4__Glomeromycota; D_5__Incertae Sedis; D_6__Glomeromycetes; D_7_…
VTX00165 "OTU5.07136845497172e+32" 0 0 0 0 0 0 0 0 0 95 0 0 0 0 21 124 0 0 0 0 0 5 0 225 0 0 0 24 0 0 0 0 0 0 0 0 0 0 169 0 0 0 0 0 0 0 0 0 0 0 0 0 0 0 0 0 0 0 46 0 3 41 0 0 0 0 0 0 0 1 0 3 0 0 0 1 0 0 1 0 0 1 1 0 0 0 0 0 0 0 0 2 0 0 7 0 0 0 0 0 0 0 0 0 0 0 0 0 0 0 1 0 0 0 0 1 "D_0__Eukaryota; D_1__Opisthokonta; D_2__Nucletmycea; D_3__Fungi; D_4__Glomeromycota; D_5__Incertae Sedis; D_6__Glomeromy…
VTX00172 "OTU2.98982016213451e+32" 0 0 0 0 0 0 0 0 0 0 0 0 0 0 0 0 0 0 0 0 0 0 0 1 0 0 0 0 0 0 0 0 0 0 0 0 0 0 0 0 0 0 0 0 0 0 0 0 1 0 0 0 1 0 0 0 0 0 0 0 1 0 0 0 0 0 0 0 0 0 0 0 0 0 0 1 0 0 0 0 0 0 0 0 0 0 0 0 0 0 0 0 0 0 0 0 0 0 0 0 0 0 0 0 0 0 0 0 0 1 0 0 0 0 0 139 "D_0__Eukaryota; D_1__Opisthokonta; D_2__Nucletmycea; D_3__Fungi; D_4__Glomeromycota; D_5__Incertae Sedis; D_6__Glomeromycetes; D_…
VTX00172 "OTU1.03829431863009e+32" 0 0 0 0 0 0 0 1 0 1 0 0 0 0 0 2 0 0 0 0 0 182 0 9 0 0 0 0 0 0 0 0 0 0 0 0 0 0 2 0 0 0 0 0 2 0 0 0 2 235 0 0 0 0 0 2 0 0 0 0 41 0 0 0 0 0 95 0 1 0 0 0 0 0 0 5 0 0 0 0 0 0 0 0 0 0 0 0 1 0 0 1 0 0 0 0 0 0 0 0 0 0 1 0 0 0 0 0 0 0 0 0 0 0 0 1 "D_0__Eukaryota; D_1__Opisthokonta; D_2__Nucletmycea; D_3__Fungi; D_4__Glomeromycota; D_5__Incertae Sedis; D_6__Glomeromycetes…
VTX00172 "OTU9.69470609080105e+32" 0 2 0 0 0 0 0 0 0 0 0 0 0 0 0 1 0 0 0 2 0 1 0 2 0 0 0 0 0 1 0 0 0 0 0 0 0 0 1 0 0 1 0 40 0 0 0 0 3 2 0 0 3 0 0 0 1 0 0 109 235 0 113 0 0 0 2 0 0 0 0 0 0 0 0 2 18 0 0 173 0 0 0 0 0 0 0 0 7 0 0 0 0 0 0 4 3 0 0 0 0 0 0 0 1 0 0 1 3 25 4 0 3 6 2 0 "D_0__Eukaryota; D_1__Opisthokonta; D_2__Nucletmycea; D_3__Fungi; D_4__Glomeromycota; D_5__Incertae Sedis; D_6__Glomeromy…
VTX00172 "OTU8.73610526776378e+32" 0 0 0 0 0 0 0 1 0 0 0 0 0 0 0 0 0 0 0 0 0 0 0 0 0 0 0 0 0 0 0 0 0 0 0 0 0 0 0 0 0 0 0 0 0 0 0 0 0 0 0 0 0 0 0 0 0 0 0 0 1 0 0 0 0 0 0 0 0 0 0 0 0 0 0 0 3 0 0 0 0 0 0 0 0 0 0 0 6 0 0 0 0 0 0 0 0 0 0 0 0 0 0 0 0 0 0 1 0 0 0 0 0 0 0 0 "D_0__Eukaryota; D_1__Opisthokonta; D_2__Nucletmycea; D_3__Fungi; D_4__Glomeromycota; D_5__Incertae Sedis; D_6__Glomeromycetes; D_7_…
VTX00172 "OTU3.47451860544311e+32" 0 0 0 0 0 0 0 15 0 6 0 0 0 0 0 0 11 0 1 8 0 0 0 2 0 0 0 0 0 0 3 0 0 0 62 0 0 0 0 0 0 0 0 0 28 0 0 0 1 2 6 0 0 0 0 0 0 1 0 0 19 0 0 0 0 0 2 0 0 6 0 0 3 0 0 1 6 0 0 0 0 0 0 0 0 0 0 0 24 0 0 0 0 0 0 223 1 0 0 1 0 0 0 0 0 0 0 0 4 13 2 0 6 1 4 1 "D_0__Eukaryota; D_1__Opisthokonta; D_2__Nucletmycea; D_3__Fungi; D_4__Glomeromycota; D_5__Incertae Sedis; D_6__Glomeromyce…
VTX00172 "OTU8.70220235187169e+32" 0 12 0 0 0 0 1 0 0 0 0 0 0 0 0 0 0 0 0 0 0 0 0 0 0 0 0 0 0 0 0 0 0 0 0 0 0 0 0 0 0 0 1 0 38 0 0 0 1 0 0 0 22 0 0 0 0 0 0 3 20 0 2 0 0 0 86 0 0 0 0 0 0 0 0 0 1 0 0 4 0 0 0 0 0 0 0 0 549 0 0 0 0 0 0 445 9 0 1 0 0 1 1 0 1 0 0 2 7 19 1 0 1 7 4 0 "D_0__Eukaryota; D_1__Opisthokonta; D_2__Nucletmycea; D_3__Fungi; D_4__Glomeromycota; D_5__Incertae Sedis; D_6__Glomeromyc…
VTX00172 "OTU9.22712698793795e+31" 0 1 0 0 0 0 2 1 0 0 0 0 0 0 0 0 0 0 0 0 0 2 0 1 0 0 2 0 0 0 0 0 0 0 0 0 0 0 0 0 0 0 0 1 3 0 0 0 16 3 0 0 100 0 1 0 0 0 0 5 70 0 5 0 0 0 8 0 0 4 0 0 7 1 0 4 10 0 0 0 0 1 0 0 0 0 0 0 7 0 0 0 0 0 0 13 15 0 0 0 0 0 4 0 0 0 0 11 27 167 0 0 6 24 18 1 "D_0__Eukaryota; D_1__Opisthokonta; D_2__Nucletmycea; D_3__Fungi; D_4__Glomeromycota; D_5__Incertae Sedis; D_6__Glomero…
VTX00172 "OTU6.87670632990027e+31" 0 0 0 0 0 0 0 0 0 0 0 0 0 0 0 0 0 0 0 0 0 0 0 0 0 0 0 0 0 0 0 0 0 0 0 0 0 0 0 0 0 0 0 0 0 0 0 0 16 0 0 0 0 0 0 0 0 0 0 0 8 0 0 0 0 0 0 0 0 0 0 0 0 0 0 0 0 0 0 0 0 0 0 0 0 0 0 0 1 0 0 0 0 0 0 2 0 0 0 0 0 0 0 0 0 0 0 0 0 0 0 0 0 0 0 0 "D_0__Eukaryota; D_1__Opisthokonta; D_2__Nucletmycea; D_3__Fungi; D_4__Glomeromycota; D_5__Incertae Sedis; D_6__Glomeromycetes; D_7…
VTX00172 "OTU3.77598748466603e+31" 0 0 0 0 1 0 0 0 0 0 0 0 0 0 0 0 0 0 0 0 0 7 0 0 0 0 0 0 0 0 0 3 0 0 0 0 0 0 0 0 0 0 0 0 0 0 0 0 0 1 0 0 0 0 0 0 0 0 0 0 6 0 0 0 0 0 0 0 0 0 0 46 0 0 0 10 0 0 0 0 0 1 0 0 0 0 0 0 0 0 0 0 0 0 0 0 0 0 0 0 0 0 0 0 0 0 0 0 0 0 0 0 0 0 0 1 "D_0__Eukaryota; D_1__Opisthokonta; D_2__Nucletmycea; D_3__Fungi; D_4__Glomeromycota; D_5__Incertae Sedis; D_6__Glomeromycetes; D_…
VTX00172 "OTU5.89993224232248e+32" 0 0 0 0 0 0 0 0 0 0 0 0 0 0 0 0 0 0 0 0 0 0 0 0 0 0 0 0 0 0 0 0 0 0 0 0 0 0 0 0 0 0 0 0 0 0 0 0 0 0 0 0 0 0 0 0 0 0 0 0 2 0 0 0 0 0 0 0 0 0 0 0 0 0 0 0 0 0 0 0 0 0 0 0 0 0 0 0 0 0 0 0 0 0 0 0 0 0 0 0 0 0 0 0 0 0 0 0 0 0 0 0 0 0 1 0 "D_0__Eukaryota; D_1__Opisthokonta; D_2__Nucletmycea; D_3__Fungi; D_4__Glomeromycota; D_5__Incertae Sedis; D_6__Glomeromycetes; D_7_…
VTX00172 "OTU9.18281273475379e+32" 0 0 2 0 0 0 3 12 0 0 0 0 0 0 0 0 1 0 0 6 0 0 0 0 0 0 3 1 0 0 0 0 0 0 1 0 0 0 0 0 0 0 5 2 5 0 0 0 63 0 2 0 38 2 0 1 1 4 5 8 143 0 2 0 0 0 17 0 0 14 0 0 15 7 0 0 23 0 0 3 0 0 0 0 0 0 0 0 130 0 0 0 0 0 0 36 24 0 2 0 0 0 2 0 6 0 0 9 37 174 24 2 11 31 21 0 "D_0__Eukaryota; D_1__Opisthokonta; D_2__Nucletmycea; D_3__Fungi; D_4__Glomeromycota; D_5__Incertae Sedis; D_6__…
VTX00172 "OTU3.01413830091747e+32" 0 0 0 0 0 0 0 0 0 0 0 0 0 0 0 0 0 0 0 0 0 5 0 0 0 0 0 0 0 0 0 0 0 0 0 0 0 0 0 0 0 0 0 13 0 0 0 0 33 1 1 0 144 0 0 0 0 3 1 6 118 2 7 0 0 0 1 0 0 1 0 0 23 2 0 1 4 0 0 12 0 2 0 0 0 0 0 0 9 0 0 0 0 0 0 57 12 0 1 0 0 0 3 0 0 0 0 2 36 237 12 1 5 32 19 2 "D_0__Eukaryota; D_1__Opisthokonta; D_2__Nucletmycea; D_3__Fungi; D_4__Glomeromycota; D_5__Incertae Sedis; D_6__Glom…
VTX00188 "OTU2.7850728680615e+32" 0 0 0 0 0 0 0 0 0 0 0 0 0 0 0 46 0 0 0 0 0 0 0 129 0 0 0 0 0 0 0 0 0 0 0 0 0 0 0 0 0 0 0 0 0 0 0 0 0 0 0 0 0 0 0 0 0 0 0 0 0 0 0 0 0 0 0 0 0 0 0 0 0 0 0 0 0 0 0 0 0 0 0 0 0 0 0 0 0 0 0 0 0 0 0 0 0 0 0 0 0 0 0 0 0 0 0 0 0 0 0 0 0 0 0 0 "D_0__Eukaryota; D_1__Opisthokonta; D_2__Nucletmycea; D_3__Fungi; D_4__Glomeromycota; D_5__Incertae Sedis; D_6__Glomeromycetes; D_…
VTX00193 "OTU7.58467798776472e+32" 1 0 0 2 5 0 6 5 9 2 1 0 2 0 0 0 2 0 0 5 395 28 0 6 0 11 3 3 0 15 1 0 3 0 17 3 2 2 1 0 161 53 2 634 51 23 11 8 120 1 29 135 6 355 485 513 5 12 2 224 274 1786 168 0 2 11 8 0 175 1 4 90 0 49 6 145 88 0 72 0 269 95 16 41 0 5 15 7 4 11 3 7 0 5 0 23 0 7 22 176 21 0 421 276 2289 2 3 8 4 1 4 4 5 0 238 5 "D_0__Eukaryota; D_1__Opisthokonta; D_2__Nucletmycea; D_3__Fungi; D…
VTX00193 "OTU7.66557254988786e+32" 48 363 361 868 531 915 1951 1359 1109 1999 271 104 143 34 127 217 786 28 27 907 3341 336 44 1216 31 1821 1814 399 18 4157 459 50 133 12 4474 123 670 309 619 87 1021 91 430 623 1335 3715 217 110 5 189 1067 146 2343 2173 854 1293 161 2900 601 499 1976 1686 112 0 345 1696 876 0 480 286 978 291 4 1747 850 3028 10 544 340 1 478 1611 1511 590 2 660 177 1614 331 583 95…
VTX00193 "OTU7.56813320745351e+32" 2 4 32 17 22 12 122 154 39 151 17 3 4 0 3 4 58 0 0 61 210 21 0 82 0 257 44 19 0 168 22 4 1 0 172 1 26 9 23 1 76 23 41 16 118 276 14 10 1 13 79 13 100 149 95 105 11 128 84 27 148 95 13 0 17 73 66 0 73 45 34 8 0 125 45 108 7 18 23 0 4 76 95 40 0 13 22 46 42 95 67 76 0 108 11 69 0 82 56 28 8 2 3 88 174 22 20 28 58 18 52 41 32 0 166 13 "D_0__Eukaryota; D_1__Opisthok…
VTX00193 "OTU3.08130341523679e+32" 4 5 3 8 7 3 27 23 11 31 2 0 1 0 0 6 7 1 2 20 32 1 1 21 0 12 28 8 0 70 1 1 4 0 42 0 6 2 10 5 1 4 5 5 13 11 0 0 2 5 0 1 88 28 3 21 1 11 1 0 36 1 1 0 4 3 10 0 9 7 0 0 0 1 0 0 0 19 0 0 1 19 7 18 0 8 0 0 2 0 15 6 0 26 2 0 0 1 7 3 0 0 3 21 11 11 4 19 19 13 18 25 0 0 71 0 "D_0__Eukaryota; D_1__Opisthokonta; D_2__Nucletmycea; D_3__Fungi; D_4__Glomeromycota; D_5__Incerta…
VTX00193 "OTU3.91645448703535e+32" 1 7 4 11 10 17 20 15 11 15 1 0 1 0 1 1 10 0 0 7 5 0 0 10 0 24 21 5 0 76 3 0 2 0 43 2 16 7 7 0 0 0 0 1 0 11 0 0 0 0 0 0 4 1 3 2 0 4 0 2 2 2 0 0 0 2 1 0 2 1 1 0 0 3 1 15 0 0 2 0 2 3 3 0 0 1 0 0 0 1 1 2 0 3 0 0 0 1 0 0 0 1 0 2 3 2 0 0 0 0 0 3 0 0 17 1 "D_0__Eukaryota; D_1__Opisthokonta; D_2__Nucletmycea; D_3__Fungi; D_4__Glomeromycota; D_5__Incertae Sedis; D_6__Glo…
VTX00193 "OTU5.25057181331796e+32" 0 4 1 1 3 0 17 9 0 4 0 0 1 0 0 0 9 0 0 9 24 0 0 4 0 6 17 7 0 70 1 0 0 0 17 3 3 0 0 0 0 0 1 1 6 5 0 0 0 0 2 0 0 0 0 7 0 6 3 0 2 0 0 0 0 0 2 0 0 5 0 0 0 2 0 0 0 3 0 0 0 2 0 0 0 0 0 0 0 0 1 0 0 0 0 0 0 0 0 1 0 0 0 7 0 0 0 0 0 1 0 0 0 0 0 0 "D_0__Eukaryota; D_1__Opisthokonta; D_2__Nucletmycea; D_3__Fungi; D_4__Glomeromycota; D_5__Incertae Sedis; D_6__Glomeromycetes;…
VTX00193 "OTU5.95588303879641e+32" 0 0 0 0 0 0 0 0 8 20 0 0 0 0 0 1 0 0 0 0 0 0 0 3 0 0 0 0 0 2 0 0 0 0 0 0 0 0 3 0 0 0 1 0 1 0 1 0 0 0 0 0 0 2 0 9 0 0 0 0 0 1 0 0 0 0 0 0 0 0 0 0 0 0 0 0 0 4 0 0 0 5 0 0 0 0 0 0 0 0 1 0 0 0 0 0 0 0 2 0 0 0 0 0 0 0 0 0 0 0 0 0 0 0 0 0 "D_0__Eukaryota; D_1__Opisthokonta; D_2__Nucletmycea; D_3__Fungi; D_4__Glomeromycota; D_5__Incertae Sedis; D_6__Glomeromycetes; D_7…
VTX00193 "OTU2.81661183620816e+32" 1 0 0 0 6 5 4 5 2 15 0 0 0 0 0 1 2 0 0 7 0 0 0 8 0 0 0 1 0 10 0 1 0 0 7 0 0 0 2 0 0 2 0 4 0 0 0 0 0 0 0 0 0 1 1 3 0 1 0 0 7 0 0 0 0 0 3 0 0 0 0 0 0 0 0 0 0 0 0 0 0 3 0 0 0 0 0 0 0 0 0 0 0 0 0 0 0 0 0 0 0 0 4 2 1 0 0 0 2 0 0 0 0 0 0 0 "D_0__Eukaryota; D_1__Opisthokonta; D_2__Nucletmycea; D_3__Fungi; D_4__Glomeromycota; D_5__Incertae Sedis; D_6__Glomeromycetes; D_…
VTX00193 "OTU2.03016173514914e+32" 0 1 0 1 32 12 9 22 0 27 6 1 0 0 0 0 4 0 0 4 3 0 0 59 2 12 14 0 0 80 0 0 0 0 32 0 10 5 0 0 1 0 0 0 1 3 0 0 0 0 0 2 1 3 0 1 1 3 2 1 21 2 0 0 1 2 0 0 0 0 1 0 0 0 2 2 0 1 1 0 0 3 2 13 0 2 0 1 1 0 1 3 0 2 1 0 0 0 1 0 1 0 0 2 2 4 0 1 0 1 0 0 1 0 3 0 "D_0__Eukaryota; D_1__Opisthokonta; D_2__Nucletmycea; D_3__Fungi; D_4__Glomeromycota; D_5__Incertae Sedis; D_6__Glomerom…
VTX00193 "OTU3.83128875611636e+32" 0 0 0 0 0 0 2 1 0 0 0 0 0 0 0 0 0 0 0 0 0 0 0 0 0 0 2 0 0 0 0 0 0 0 0 0 0 0 1 0 0 1 0 0 0 1 0 0 0 0 0 0 0 1 0 0 0 1 0 0 1 0 0 0 1 0 1 0 0 1 0 0 0 1 0 1 0 0 0 0 0 1 2 0 0 0 0 1 0 0 0 0 0 2 0 0 0 0 0 0 0 0 1 0 1 0 0 0 1 0 0 2 0 0 0 0 "D_0__Eukaryota; D_1__Opisthokonta; D_2__Nucletmycea; D_3__Fungi; D_4__Glomeromycota; D_5__Incertae Sedis; D_6__Glomeromycetes; D_7_…
VTX00193 "OTU4.14140858078625e+32" 0 0 0 0 0 0 0 0 0 0 0 0 0 0 0 0 0 0 0 0 2 0 0 0 0 0 0 0 0 0 0 0 0 0 0 0 0 0 0 0 2 0 0 4 0 0 0 0 0 0 1 0 0 2 9 0 0 0 0 3 3 7 0 0 0 0 0 0 0 0 0 0 0 1 0 0 0 0 0 0 5 2 0 0 0 0 0 0 0 0 0 0 0 0 0 0 0 0 0 3 1 0 2 4 10 0 0 0 0 0 0 0 0 0 0 0 "D_0__Eukaryota; D_1__Opisthokonta; D_2__Nucletmycea; D_3__Fungi; D_4__Glomeromycota; D_5__Incertae Sedis; D_6__Glomeromycetes; D_7…
VTX00195 "OTU1.71662521053989e+32" 0 0 0 0 0 0 0 0 0 0 0 0 0 0 0 0 0 0 0 0 0 0 0 1 0 0 0 0 0 0 0 0 0 0 0 0 0 0 0 0 0 0 0 0 0 0 0 0 0 0 0 0 0 0 4 0 0 0 0 0 2 0 0 0 0 0 1 0 0 0 0 0 0 0 0 0 0 0 0 0 0 1 0 2 0 0 0 0 0 0 5 4 0 1 0 0 0 4 0 0 0 0 0 0 0 0 0 0 2 0 0 0 0 0 0 0 "D_0__Eukaryota; D_1__Opisthokonta; D_2__Nucletmycea; D_3__Fungi; D_4__Glomeromycota; D_5__Incertae Sedis; D_6__Glomeromycetes; D_7_…
VTX00195 "OTU4.25186991191033e+32" 1 3 0 1 2 0 4 0 0 5 0 1 0 0 0 0 0 0 4 0 0 4 0 5 0 2 1 3 0 4 2 9 0 0 2 0 1 0 2 0 1 0 0 0 1 2 0 0 6 0 0 4 0 4 2 0 1 0 0 1 6 5 1 0 1 3 8 0 0 1 0 0 0 0 0 1 2 1 2 0 0 5 1 3 0 0 4 0 0 1 5 1 0 0 0 1 0 11 3 1 0 0 6 3 0 0 0 0 4 0 5 0 0 1 2 0 "D_0__Eukaryota; D_1__Opisthokonta; D_2__Nucletmycea; D_3__Fungi; D_4__Glomeromycota; D_5__Incertae Sedis; D_6__Glomeromycetes; D_7…
VTX00195 "OTU9.28812163752983e+32" 0 0 0 0 0 0 0 0 0 0 0 0 0 0 0 0 0 0 0 0 0 0 0 0 0 0 0 0 0 0 0 0 0 0 0 0 0 0 0 0 0 0 0 0 0 0 0 0 0 0 0 0 0 0 0 0 0 0 0 0 0 0 0 1 0 0 1 0 0 0 0 0 0 0 0 0 0 0 0 0 0 2 0 1 0 0 0 0 0 0 3 1 0 0 0 0 0 2 1 0 0 0 0 0 0 0 0 0 1 0 0 0 0 0 0 0 "D_0__Eukaryota; D_1__Opisthokonta; D_2__Nucletmycea; D_3__Fungi; D_4__Glomeromycota; D_5__Incertae Sedis; D_6__Glomeromycetes; D_7_…
VTX00195 "OTU5.40815048074947e+32" 0 0 0 0 0 0 0 1 0 4 0 0 0 0 0 0 0 0 0 0 0 2 0 1 0 0 0 1 0 0 1 2 0 0 0 0 0 0 1 0 0 0 0 1 0 0 0 0 1 0 0 0 0 0 1 0 0 0 0 0 0 0 0 0 0 0 3 0 0 0 0 0 0 0 0 0 0 0 2 0 0 0 0 0 0 0 3 0 0 0 0 0 0 1 0 0 0 1 1 0 0 0 0 0 0 0 0 0 0 0 0 0 0 0 0 0 "D_0__Eukaryota; D_1__Opisthokonta; D_2__Nucletmycea; D_3__Fungi; D_4__Glomeromycota; D_5__Incertae Sedis; D_6__Glomeromycetes; D_7_…
VTX00195 "OTU1.09521497851507e+32" 0 0 0 0 2 0 1 0 0 0 0 0 0 0 0 0 0 0 0 0 0 4 0 8 0 0 0 1 0 0 0 1 0 0 0 0 1 0 2 0 0 0 0 0 1 0 0 1 5 0 0 2 0 3 0 0 0 1 0 0 0 1 0 0 0 1 2 0 0 0 0 0 0 0 0 0 0 0 0 0 0 0 0 0 0 0 0 0 0 0 1 0 0 4 0 0 0 2 0 0 0 0 0 0 0 0 0 0 0 0 0 0 0 0 2 0 "D_0__Eukaryota; D_1__Opisthokonta; D_2__Nucletmycea; D_3__Fungi; D_4__Glomeromycota; D_5__Incertae Sedis; D_6__Glomeromycetes; D_7_…
VTX00195 "OTU7.99443717323466e+32" 0 7 6 12 26 1 100 8 23 99 0 1 5 0 12 5 1 0 18 1 0 6 0 100 1 20 8 22 0 33 10 42 7 15 18 1 13 0 3 0 3 10 14 4 5 27 0 8 2 21 5 62 0 61 24 20 2 28 40 5 30 16 0 17 12 20 135 0 8 8 3 0 0 9 12 12 32 10 40 4 0 5 32 74 0 0 104 0 46 83 135 10 15 236 13 5 5 289 70 3 1 0 8 6 0 0 0 0 16 0 4 3 0 0 1 0 "D_0__Eukaryota; D_1__Opisthokonta; D_2__Nucletmycea; D_3__Fungi; D_4__Glom…
VTX00195 "OTU3.14835193616027e+32" 0 0 0 0 1 0 0 0 0 1 0 0 0 0 0 1 0 0 0 0 0 2 0 4 0 0 0 0 0 0 2 1 2 0 0 0 0 0 0 0 0 0 1 1 1 0 0 0 0 1 1 2 0 1 0 0 0 1 0 0 0 0 0 0 0 1 10 0 0 1 0 0 0 0 1 0 1 0 0 0 0 0 1 3 0 0 5 0 2 0 2 2 0 13 1 0 0 8 6 0 0 0 0 0 0 0 0 0 0 0 0 0 0 0 0 0 "D_0__Eukaryota; D_1__Opisthokonta; D_2__Nucletmycea; D_3__Fungi; D_4__Glomeromycota; D_5__Incertae Sedis; D_6__Glomeromycetes; D_…
VTX00195 "OTU1.35541288080887e+31" 2 0 0 1 9 0 18 2 1 22 0 0 2 0 1 3 1 0 5 0 0 3 0 23 0 1 2 6 0 10 1 11 0 1 1 0 1 0 5 1 1 2 1 3 0 5 2 1 1 7 0 15 0 18 8 3 0 5 7 1 8 3 0 5 2 4 29 0 1 4 1 0 0 0 1 1 4 7 11 0 0 1 3 10 0 2 22 0 4 16 24 0 3 34 4 0 1 56 14 0 0 0 0 0 0 0 0 0 4 0 0 0 0 0 0 0 "D_0__Eukaryota; D_1__Opisthokonta; D_2__Nucletmycea; D_3__Fungi; D_4__Glomeromycota; D_5__Incertae Sedis; D_6__Glom…
VTX00197 "OTU8.97313515537089e+32" 0 0 0 0 0 0 0 0 0 0 0 0 0 0 0 0 0 0 0 0 0 0 0 0 0 0 0 1 0 0 0 0 0 0 0 0 0 0 0 0 0 0 0 0 0 0 0 0 0 0 0 0 0 0 0 0 0 0 0 0 0 0 0 0 0 0 0 0 0 0 0 0 0 0 0 0 0 0 0 0 0 0 0 0 0 0 0 0 0 0 0 0 0 0 0 0 0 0 0 0 0 0 0 0 0 0 0 0 0 0 0 0 0 0 0 0 "D_0__Eukaryota; D_1__Opisthokonta; D_2__Nucletmycea; D_3__Fungi; D_4__Glomeromycota; D_5__Incertae Sedis; D_6__Glomeromycetes; D_7_…
VTX00199 "OTU9.90842235031614e+32" 1 0 2 0 0 0 0 4 0 0 0 0 0 0 0 0 0 0 0 19 0 0 0 0 0 0 0 0 0 0 0 1 0 0 0 0 1 0 0 0 0 0 0 0 0 0 0 0 0 0 0 0 0 0 0 0 0 0 0 0 0 0 0 0 0 0 0 0 0 0 0 0 0 0 0 0 0 0 0 0 0 0 0 0 0 0 0 0 0 0 0 0 0 0 0 0 0 0 0 0 0 0 0 0 0 0 0 0 0 0 0 0 0 0 0 0 "D_0__Eukaryota; D_1__Opisthokonta; D_2__Nucletmycea; D_3__Fungi; D_4__Glomeromycota; D_5__Incertae Sedis; D_6__Glomeromycetes; D_7…
VTX00199 "OTU9.0585022799036e+32" 0 0 0 0 0 0 0 0 0 0 0 0 0 0 0 0 0 0 0 0 0 0 0 0 0 0 0 0 0 0 0 0 0 0 0 0 0 0 0 0 0 0 4 0 2 0 0 0 0 0 0 0 0 0 0 0 0 0 0 0 0 11 0 0 0 0 0 0 0 0 0 0 0 0 0 0 0 0 0 0 0 0 0 0 0 0 0 0 0 0 0 0 0 0 0 0 0 0 0 0 0 0 0 0 0 0 0 0 0 0 0 0 0 0 0 0 "D_0__Eukaryota; D_1__Opisthokonta; D_2__Nucletmycea; D_3__Fungi; D_4__Glomeromycota; D_5__Incertae Sedis; D_6__Glomeromycetes; D_7_…
VTX00199 "OTU5.56456906707407e+32" 0 0 0 0 3 3 0 0 0 2 0 0 0 0 0 0 0 0 0 13 0 0 0 2 0 0 0 0 0 0 0 0 0 0 2 1 1 0 0 0 0 0 3 0 18 0 0 0 0 0 0 0 0 0 0 0 0 0 0 0 1 2 0 0 0 0 0 0 0 0 0 0 0 0 0 7 0 0 0 0 0 0 0 0 0 0 0 0 0 0 4 0 0 0 0 0 0 0 0 1 0 0 0 0 0 0 0 0 0 0 0 4 0 4 0 0 "D_0__Eukaryota; D_1__Opisthokonta; D_2__Nucletmycea; D_3__Fungi; D_4__Glomeromycota; D_5__Incertae Sedis; D_6__Glomeromycetes; D_…
VTX00199 "OTU3.00068685433221e+32" 70 23 460 0 35 2 1 466 0 0 0 0 0 0 0 0 1 0 0 6705 0 0 0 0 17 55 0 0 0 0 14 59 0 79 0 0 21 0 0 0 0 0 0 0 24 0 0 0 0 0 0 0 1 0 0 0 0 0 0 1 1 3 1 1 1 0 0 0 0 0 0 0 0 0 0 2 0 0 1 0 0 0 0 0 0 0 0 0 0 0 1 0 0 0 0 0 0 0 0 0 0 0 0 0 0 0 0 0 0 0 0 0 0 0 0 0 "D_0__Eukaryota; D_1__Opisthokonta; D_2__Nucletmycea; D_3__Fungi; D_4__Glomeromycota; D_5__Incertae Sedis; D_6__Glo…
VTX00199 "OTU6.75895547905096e+32" 0 0 0 0 0 0 0 0 0 0 0 0 0 0 0 0 0 0 0 0 0 0 0 0 0 0 0 0 0 0 0 0 0 0 0 0 0 0 0 0 0 0 0 0 11 0 0 0 0 0 0 0 0 0 0 0 0 0 0 0 0 0 0 0 0 0 0 0 0 0 0 0 0 0 0 0 0 0 0 0 0 0 0 0 0 0 0 0 0 0 0 0 0 0 0 0 0 0 0 0 0 0 0 0 0 0 0 0 0 0 0 0 0 0 0 0 "D_0__Eukaryota; D_1__Opisthokonta; D_2__Nucletmycea; D_3__Fungi; D_4__Glomeromycota; D_5__Incertae Sedis; D_6__Glomeromycetes; D_7…
VTX00199 "OTU6.93443252636531e+32" 0 0 0 2 0 0 0 0 0 0 0 0 0 0 0 0 0 0 0 1 0 0 0 0 0 2 0 0 0 0 0 0 1 0 0 0 0 0 0 0 0 0 0 0 15 0 0 0 0 0 0 0 0 0 0 0 0 0 0 0 0 0 0 0 0 0 0 0 0 0 0 0 0 0 0 0 0 0 0 0 0 0 0 0 0 0 0 0 0 0 0 0 0 0 0 0 0 0 0 0 0 0 0 0 0 0 0 0 0 0 0 0 0 0 0 0 "D_0__Eukaryota; D_1__Opisthokonta; D_2__Nucletmycea; D_3__Fungi; D_4__Glomeromycota; D_5__Incertae Sedis; D_6__Glomeromycetes; D_7…
VTX00199 "OTU7.11614765378975e+32" 0 0 1 0 0 0 0 0 0 0 0 0 0 0 0 0 0 0 0 4 0 0 0 0 0 0 0 0 0 0 0 0 0 1 0 0 0 0 0 0 0 0 0 0 1 0 0 0 0 0 0 0 0 0 0 0 0 0 0 0 0 0 0 0 0 0 0 0 0 0 0 0 0 0 0 1 0 0 0 0 0 0 0 0 0 0 0 0 0 0 0 0 0 0 0 0 0 0 0 0 0 0 0 0 0 0 0 0 0 0 0 0 0 0 0 0 "D_0__Eukaryota; D_1__Opisthokonta; D_2__Nucletmycea; D_3__Fungi; D_4__Glomeromycota; D_5__Incertae Sedis; D_6__Glomeromycetes; D_7_…
VTX00199 "OTU5.17071243131063e+32" 58 403 189 156 65 141 82 75 15 19 40 0 0 0 0 0 15 0 34 617 0 0 2 166 12 51 156 98 90 76 31 36 133 4 256 100 95 15 22 0 0 1 709 17 13143 45 0 1 0 0 1 0 0 1 0 0 0 7 0 0 273 1034 0 0 1 0 0 0 2 0 0 1 0 0 0 734 0 0 0 0 0 0 30 1 0 0 1 0 0 0 142 11 1 0 0 0 1 0 1 56 0 0 0 0 0 0 0 0 0 0 0 167 1 230 105 0 "D_0__Eukaryota; D_1__Opisthokonta; D_2__Nucletmycea; D_3__Fungi; D…
VTX00199 "OTU3.60516950166804e+32" 0 0 0 0 0 0 0 1 0 0 0 0 0 0 0 0 0 0 0 13 0 0 0 0 0 0 0 0 0 0 0 0 0 0 0 0 0 0 0 0 0 0 0 0 0 0 0 0 0 0 0 0 0 0 0 0 0 0 0 0 0 0 0 0 0 0 0 0 0 0 0 0 0 0 0 0 0 0 0 0 0 0 0 0 0 0 0 0 0 0 0 0 0 0 0 0 0 0 0 0 0 0 0 0 0 0 0 0 0 0 0 0 0 0 0 0 "D_0__Eukaryota; D_1__Opisthokonta; D_2__Nucletmycea; D_3__Fungi; D_4__Glomeromycota; D_5__Incertae Sedis; D_6__Glomeromycetes; D_7…
VTX00199 "OTU9.05430164095591e+32" 3 31 19 8 12 5 11 18 1 2 1 0 0 0 0 0 1 0 0 61 0 0 0 17 0 0 6 18 2 14 1 2 4 0 23 5 12 0 0 0 0 0 47 9 960 11 0 0 0 0 0 0 0 0 0 0 0 4 0 0 8 94 0 0 0 0 0 0 0 0 0 1 0 0 0 72 0 0 0 0 0 0 0 0 0 0 0 0 0 0 8 3 0 0 0 0 0 0 0 14 0 0 0 0 0 0 0 0 0 0 0 10 0 24 13 0 "D_0__Eukaryota; D_1__Opisthokonta; D_2__Nucletmycea; D_3__Fungi; D_4__Glomeromycota; D_5__Incertae Sedis; D_6_…
VTX00199 "OTU1.27266383434876e+32" 0 0 6 0 2 0 0 3 0 0 0 0 0 0 0 0 0 0 0 26 0 0 0 0 0 0 0 0 0 0 0 0 0 0 0 0 0 0 0 0 0 0 0 0 0 0 0 0 0 0 0 0 0 0 0 0 0 0 0 0 0 0 0 0 0 0 0 0 0 0 0 0 0 0 0 0 0 0 0 0 0 0 0 0 0 0 0 0 0 0 0 0 0 0 0 1 0 0 0 0 0 0 0 0 0 0 0 0 0 0 0 0 0 0 0 0 "D_0__Eukaryota; D_1__Opisthokonta; D_2__Nucletmycea; D_3__Fungi; D_4__Glomeromycota; D_5__Incertae Sedis; D_6__Glomeromycetes; D_7…
VTX00212 "OTU4.91537183818622e+32" 12 15 94 24 0 154 320 62 1 7 0 0 0 0 0 42 212 0 240 221 0 1 0 50 0 35 0 27 0 6 0 0 29 16 276 650 40 108 0 0 0 0 0 0 0 815 0 1 612 0 1 0 0 0 0 1 0 0 0 3 1 0 0 0 1 0 0 0 0 0 0 1 1 0 0 1 0 0 0 0 0 0 0 0 0 0 0 0 0 0 0 1 0 0 0 0 0 0 0 0 0 0 0 0 0 0 0 0 1 0 0 0 0 5 1 0 "D_0__Eukaryota; D_1__Opisthokonta; D_2__Nucletmycea; D_3__Fungi; D_4__Glomeromycota; D_5__Incertae …
VTX00212 "OTU7.09807867009829e+32" 27 10 13 0 0 0 1 4 0 0 0 0 0 0 0 0 1 0 1 156 0 0 0 0 0 0 0 0 0 0 0 0 0 0 0 2 0 0 0 0 0 0 0 0 0 2 0 0 1 0 0 0 0 1 0 0 0 0 0 0 0 0 0 0 0 0 0 0 0 0 0 0 0 0 0 0 0 0 0 0 0 0 0 0 0 0 0 0 0 0 0 0 0 0 0 0 0 0 0 0 0 0 0 0 0 0 0 0 0 0 0 0 0 0 0 0 "D_0__Eukaryota; D_1__Opisthokonta; D_2__Nucletmycea; D_3__Fungi; D_4__Glomeromycota; D_5__Incertae Sedis; D_6__Glomeromycetes;…
VTX00214 "OTU8.71294158236061e+32" 0 0 0 0 0 1 0 0 0 0 0 0 0 0 0 0 1 0 0 1 0 0 0 0 0 0 0 0 0 4 0 0 1 0 1 0 0 0 0 0 0 5 0 0 1 0 0 0 0 0 1 8 0 0 0 6 0 2 3 5 0 0 0 0 0 0 0 0 0 0 0 0 0 0 3 0 0 0 0 0 0 0 0 0 0 0 0 0 0 0 0 0 0 0 0 0 0 0 0 0 0 0 0 0 0 0 0 0 0 0 0 0 0 0 0 0 "D_0__Eukaryota; D_1__Opisthokonta; D_2__Nucletmycea; D_3__Fungi; D_4__Glomeromycota; D_5__Incertae Sedis; D_6__Glomeromycetes; D_7_…
VTX00214 "OTU4.76515191988295e+32" 0 0 1 0 13 121 52 150 40 46 0 0 0 0 0 0 154 0 84 70 2 1824 0 196 0 24 0 33 0 223 31 147 26 0 65 0 0 79 14 0 6 1392 42 1 222 1749 13 35 8 31 23 1059 0 1126 33 485 245 37 141 509 78 294 7 0 2 0 49 0 1 79 0 31 5 0 571 200 2 277 0 0 1 17 0 0 0 0 0 0 0 29 15 1 0 0 0 0 0 0 0 15 39 0 0 0 1 0 0 0 1 0 0 0 0 9 4 0 "D_0__Eukaryota; D_1__Opisthokonta; D_2__Nucletmycea; D_3_…
VTX00214 "OTU1.63067159465672e+32" 0 0 0 0 0 0 0 0 0 0 0 0 0 0 0 0 0 0 0 0 0 0 0 4 0 0 0 0 0 0 0 0 0 0 1 0 0 0 0 0 0 0 0 0 0 11 0 0 0 0 0 2 0 9 0 0 0 0 0 0 0 0 0 0 0 0 1 0 0 0 0 0 0 0 0 0 0 0 0 0 0 0 0 0 0 0 0 0 0 0 0 0 0 0 0 0 0 0 0 0 0 0 0 0 0 0 0 0 0 0 0 0 0 0 0 0 "D_0__Eukaryota; D_1__Opisthokonta; D_2__Nucletmycea; D_3__Fungi; D_4__Glomeromycota; D_5__Incertae Sedis; D_6__Glomeromycetes; D_7…
VTX00219 "OTU2.52091640727617e+32" 0 56 127 264 0 0 25 12 0 0 137 61 1 14 0 0 0 0 0 1353 0 0 0 22 0 44 25 0 0 0 216 116 0 0 0 0 0 0 0 1 3 0 0 0 0 0 0 0 0 0 0 0 0 0 0 1 0 0 0 3 0 0 5 0 0 0 0 0 0 1 0 0 485 0 0 0 1 0 0 1 0 0 2 0 0 0 0 0 0 0 0 0 0 0 0 0 1 0 0 8 129 0 0 0 3 0 0 1922 0 0 0 0 0 0 2 0 "D_0__Eukaryota; D_1__Opisthokonta; D_2__Nucletmycea; D_3__Fungi; D_4__Glomeromycota; D_5__Incertae Sedi…
VTX00219 "OTU4.66906276831907e+31" 0 2 1 0 1 0 0 3 0 0 0 0 0 0 0 0 0 0 0 2 0 0 0 0 0 0 1 0 0 0 0 0 0 0 0 0 0 0 0 0 1 0 0 0 0 0 0 0 0 0 0 0 0 0 0 0 0 0 0 1 0 0 0 0 0 0 0 0 0 0 0 0 0 0 0 0 0 0 0 0 0 0 0 0 0 0 0 0 0 0 0 0 0 0 0 0 0 0 0 0 0 0 0 0 0 0 0 0 0 0 0 0 0 0 0 0 "D_0__Eukaryota; D_1__Opisthokonta; D_2__Nucletmycea; D_3__Fungi; D_4__Glomeromycota; D_5__Incertae Sedis; D_6__Glomeromycetes; D_7_…
VTX00219 "OTU5.05481880315969e+32" 0 32 207 50 9 0 0 35 0 0 1 1 0 0 0 0 0 0 0 68 0 0 0 0 0 95 13 0 0 0 0 31 0 0 0 0 0 0 0 0 2 1 0 0 0 0 0 0 0 0 0 0 0 0 0 0 0 0 0 0 0 0 0 0 0 0 0 0 1 0 0 0 2 0 0 0 0 0 0 0 0 0 0 0 0 0 0 0 0 0 0 0 0 0 0 0 0 0 0 0 1 0 0 0 0 0 0 5 0 0 0 0 0 2 2 0 "D_0__Eukaryota; D_1__Opisthokonta; D_2__Nucletmycea; D_3__Fungi; D_4__Glomeromycota; D_5__Incertae Sedis; D_6__Glomeromyce…
VTX00222 "OTU3.10311558203079e+32" 0 0 0 0 0 0 0 0 0 0 0 0 0 0 0 0 0 0 0 2 9 16 0 9 0 0 0 0 0 0 0 0 0 0 0 0 0 0 0 0 0 22 1 0 7 1 0 1 0 0 0 4 0 0 10 0 3 0 8 0 1 0 5 15 0 23 0 0 9 1 2 0 0 1 0 0 0 0 1 0 0 5 0 1 16 0 2 26 0 0 0 32 0 0 0 0 0 0 1 0 0 0 0 0 0 0 0 0 0 1 0 0 0 0 0 0 "D_0__Eukaryota; D_1__Opisthokonta; D_2__Nucletmycea; D_3__Fungi; D_4__Glomeromycota; D_5__Incertae Sedis; D_6__Glomeromycet…
VTX00222 "OTU2.54600059864668e+32" 0 0 0 2 0 0 0 0 0 1 0 0 0 0 0 0 0 0 0 0 53 19 0 1 0 0 0 0 0 0 0 0 0 0 0 0 2 0 0 0 17 18 15 0 1 4 0 13 5 0 7 3 0 0 45 1 1 0 20 0 1 0 0 16 0 10 0 0 2 9 22 0 0 10 0 0 6 0 0 0 0 19 0 1 0 2 3 28 8 1 8 39 0 0 2 0 0 8 1 1 9 0 0 0 0 0 0 0 0 5 0 0 0 0 0 0 "D_0__Eukaryota; D_1__Opisthokonta; D_2__Nucletmycea; D_3__Fungi; D_4__Glomeromycota; D_5__Incertae Sedis; D_6__Glome…
VTX00222 "OTU4.8558879670918e+32" 0 0 0 0 0 0 0 0 0 0 0 0 0 0 0 0 0 0 0 0 0 0 0 0 0 0 0 0 0 0 0 0 0 0 0 0 0 0 0 0 0 0 0 0 0 0 0 0 254 0 0 0 0 0 0 11 0 92 82 0 19 0 0 0 0 0 0 0 0 0 0 0 92 0 0 1 0 0 91 0 0 0 0 0 0 0 0 0 0 0 4 0 0 0 0 0 0 0 0 0 0 0 0 0 0 0 0 0 0 0 0 0 0 0 0 0 "D_0__Eukaryota; D_1__Opisthokonta; D_2__Nucletmycea; D_3__Fungi; D_4__Glomeromycota; D_5__Incertae Sedis; D_6__Glomeromycete…
VTX00222 "OTU4.46628221890741e+32" 0 7 0 0 0 0 0 5 0 10 0 0 0 0 0 0 0 0 43 0 0 418 0 83 0 0 0 0 0 0 0 0 0 0 0 0 0 0 0 0 139 113 81 0 0 54 20 45 3 0 39 36 0 1 317 0 6 0 230 0 2 0 5 938 0 436 0 0 10 0 0 0 2 0 0 0 3 0 0 0 0 367 8 5 0 1 36 3 12 19 30 570 0 24 13 28 0 149 11 2 0 0 0 0 0 0 0 0 1 231 0 0 1 0 1 0 "D_0__Eukaryota; D_1__Opisthokonta; D_2__Nucletmycea; D_3__Fungi; D_4__Glomeromycota; D_5__I…
VTX00222 "OTU3.53855778022588e+32" 0 0 0 0 0 0 0 0 0 0 0 0 0 0 0 0 0 0 0 0 0 0 0 0 0 0 0 0 0 0 0 0 0 0 0 0 0 0 0 0 5 1 0 0 0 5 0 0 0 0 0 2 0 0 1 0 0 0 0 0 0 0 1 0 0 1 0 0 3 2 0 0 0 3 0 0 0 0 0 0 0 0 0 0 0 0 0 0 0 1 2 0 0 0 1 2 0 6 5 0 5 0 0 0 0 0 0 0 0 0 0 0 0 0 0 0 "D_0__Eukaryota; D_1__Opisthokonta; D_2__Nucletmycea; D_3__Fungi; D_4__Glomeromycota; D_5__Incertae Sedis; D_6__Glomeromycetes; D_7_…
VTX00222 "OTU5.30474030163575e+31" 0 0 0 0 0 0 0 0 0 0 0 0 0 0 0 0 0 0 0 0 2 16 0 2 0 0 0 0 0 0 0 0 0 0 0 0 0 0 0 0 10 1 0 0 3 0 0 0 2 0 1 1 0 0 9 1 0 0 5 0 2 0 0 14 0 6 0 0 3 0 0 0 0 0 0 0 1 0 0 0 0 12 0 0 0 0 0 6 4 0 1 15 0 1 1 1 0 7 1 1 1 0 0 0 0 0 0 0 0 3 0 0 0 0 0 0 "D_0__Eukaryota; D_1__Opisthokonta; D_2__Nucletmycea; D_3__Fungi; D_4__Glomeromycota; D_5__Incertae Sedis; D_6__Glomeromycetes;…
VTX00222 "OTU9.90850370396657e+32" 4 0 0 9 0 0 0 0 16 0 0 0 0 0 0 1 0 0 0 0 480 315 0 15 0 0 0 0 0 0 0 0 0 8 0 0 0 1 0 0 2 426 121 49 1 68 11 99 1 0 11 131 0 0 295 0 3 24 189 0 53 35 0 114 121 315 60 0 95 37 235 0 0 55 1 0 107 0 50 0 0 101 13 0 6 15 12 1078 63 0 30 369 0 23 27 16 0 216 31 8 0 24 0 0 0 0 0 1 0 2 0 0 0 4 98 1 "D_0__Eukaryota; D_1__Opisthokonta; D_2__Nucletmycea; D_3__Fungi; D_4__Gl…
VTX00222 "OTU2.43139873039681e+32" 0 0 0 0 0 0 0 0 0 0 0 0 0 0 0 0 0 0 0 0 0 3 0 0 0 1 0 0 0 1 0 0 0 0 0 0 0 0 0 0 2 2 0 0 1 0 0 3 1 0 0 0 0 0 0 0 0 1 2 0 0 0 7 2 0 1 0 0 1 0 0 0 0 0 0 0 5 0 0 0 0 1 0 0 1 0 1 2 0 0 0 2 0 0 1 0 0 1 0 0 2 0 0 0 0 0 0 0 0 0 0 0 0 1 0 0 "D_0__Eukaryota; D_1__Opisthokonta; D_2__Nucletmycea; D_3__Fungi; D_4__Glomeromycota; D_5__Incertae Sedis; D_6__Glomeromycetes; D_7_…
VTX00222 "OTU2.23877692263695e+32" 0 9 0 50 0 0 0 2 0 12 0 0 0 0 0 0 0 0 0 0 467 786 0 56 1 1 0 0 0 5 0 0 0 0 0 0 6 0 0 0 153 95 115 0 42 47 0 48 90 0 88 115 1 0 303 8 0 0 90 0 20 1 3 39 3 121 4 0 60 63 506 0 0 44 0 0 49 0 2 0 1 344 0 17 64 24 34 2144 39 0 104 1351 1 30 75 44 0 84 3 5 72 0 0 0 0 0 0 0 0 4 0 0 1 9 1 0 "D_0__Eukaryota; D_1__Opisthokonta; D_2__Nucletmycea; D_3__Fungi; D_4__Glomeromy…
VTX00222 "OTU3.39366305406905e+32" 0 16 0 41 20 0 10 1 19 11 1 0 0 0 0 0 1 0 1 23 395 1669 1 219 0 0 0 0 1 4 0 0 0 1 1 0 1 0 0 2 259 649 409 4 227 103 35 116 27 0 52 359 0 0 753 22 12 8 896 0 68 6 17 960 27 1046 6 19 167 72 40 0 1 131 207 0 67 123 29 0 0 297 179 38 24 8 107 1055 85 47 163 1800 0 124 159 41 1 202 59 17 1 68 0 0 0 0 0 1 0 845 0 0 0 392 8 0 "D_0__Eukaryota; D_1__Opisthokonta; D_2__N…
VTX00222 "OTU6.16053659867017e+32" 3 0 0 0 1 1 0 0 0 0 0 0 0 0 0 0 0 0 1 0 6 454 0 150 0 23 0 15 1 50 0 0 0 0 0 0 0 0 0 0 82 187 122 2 58 62 18 195 1253 0 22 34 0 8 504 0 12 11 279 0 0 0 61 39 0 127 1 0 43 21 1 0 1 32 0 0 25 0 78 0 0 224 96 12 66 6 99 1237 23 49 104 776 0 0 62 33 0 304 59 19 27 0 0 0 0 0 0 0 0 6 0 0 1 5 0 0 "D_0__Eukaryota; D_1__Opisthokonta; D_2__Nucletmycea; D_3__Fungi; D_4__Gl…
VTX00225 "OTU3.99578127193465e+32" 0 81 61 104 8 14 112 24 0 0 0 1 0 22 0 30 26 0 0 10 0 0 0 0 0 35 36 0 0 0 1 2 0 0 11 0 45 1 22 0 0 0 0 0 0 0 0 0 0 0 0 0 0 0 0 0 0 0 0 0 0 0 0 0 0 0 0 0 0 0 0 0 0 0 0 0 0 0 0 0 0 0 0 0 0 0 0 0 0 0 0 0 0 0 0 0 0 0 0 0 0 0 0 0 0 0 0 0 0 0 0 0 0 0 0 0 "D_0__Eukaryota; D_1__Opisthokonta; D_2__Nucletmycea; D_3__Fungi; D_4__Glomeromycota; D_5__Incertae Sedis; D_6__Glo…
VTX00225 "OTU6.88515301647517e+32" 0 0 0 0 0 0 0 0 0 0 0 0 0 0 0 0 0 0 0 0 0 0 0 0 0 0 0 0 0 0 0 0 0 0 0 0 0 0 0 0 0 0 0 0 0 0 0 0 0 0 0 0 0 0 0 0 0 0 0 0 0 0 0 0 0 0 0 0 0 0 0 0 7 0 0 0 0 0 0 0 0 0 0 0 0 0 0 0 0 0 0 0 0 0 0 0 0 0 0 0 0 39 0 0 0 0 0 0 0 0 0 0 0 0 0 0 "D_0__Eukaryota; D_1__Opisthokonta; D_2__Nucletmycea; D_3__Fungi; D_4__Glomeromycota; D_5__Incertae Sedis; D_6__Glomeromycetes; D_7…
VTX00225 "OTU5.09719871828903e+32" 0 422 721 151 130 101 429 122 2 1 136 1 59 50 0 62 158 0 6 331 0 1 0 72 1 106 207 5 0 20 57 30 73 1 534 96 82 92 62 0 0 0 0 0 0 0 0 0 0 0 0 0 0 0 0 0 0 0 0 0 0 0 0 0 0 0 0 0 0 0 0 0 0 0 0 0 0 0 0 0 0 0 0 0 0 0 0 0 0 1 0 0 0 0 0 0 0 0 0 0 3 0 0 1 0 0 0 0 0 0 0 0 0 0 0 0 "D_0__Eukaryota; D_1__Opisthokonta; D_2__Nucletmycea; D_3__Fungi; D_4__Glomeromycota; D_5__Inc…
VTX00227 "OTU5.88767139824391e+32" 0 0 0 0 0 0 0 0 0 0 0 0 0 0 0 0 0 0 0 0 0 0 0 0 0 0 0 0 0 0 0 0 0 0 0 0 0 0 0 0 0 0 0 0 0 0 0 0 0 0 0 0 0 0 0 0 0 0 0 0 0 0 24 0 0 0 0 0 0 0 0 0 157 1 0 0 0 0 0 0 0 0 0 0 0 0 0 0 0 0 0 0 0 0 0 1 0 0 0 0 1 3 42 0 0 0 2 0 0 0 0 1 0 1 1 0 "D_0__Eukaryota; D_1__Opisthokonta; D_2__Nucletmycea; D_3__Fungi; D_4__Glomeromycota; D_5__Incertae Sedis; D_6__Glomeromycetes; …
VTX00234 "OTU8.14338943158422e+32" 0 0 0 1 1 0 0 0 0 0 0 0 0 0 0 0 0 0 0 0 0 0 0 2 0 0 0 1 0 0 0 0 0 0 1 0 0 0 0 0 0 0 4 0 89 0 0 0 0 0 0 0 0 0 0 0 0 0 0 0 0 1 0 0 0 0 0 0 0 0 0 0 0 0 0 3 0 0 0 0 0 0 0 0 0 0 0 0 0 0 0 0 0 0 0 0 0 0 0 1 0 0 0 0 0 0 0 0 0 0 0 0 0 1 0 0 "D_0__Eukaryota; D_1__Opisthokonta; D_2__Nucletmycea; D_3__Fungi; D_4__Glomeromycota; D_5__Incertae Sedis; D_6__Glomeromycetes; D_7…
VTX00247 "OTU2.28239640479345e+32" 0 0 0 0 0 0 0 0 0 0 0 0 0 0 0 0 0 0 0 0 4 6 0 0 0 0 0 0 0 0 0 0 0 0 1 0 1 0 0 1 10 3 22 11 22 30 18 20 0 26 31 9 0 23 0 13 44 4 11 2 15 8 0 2 0 5 1 2 15 3 2 21 31 18 3 8 5 1 15 0 0 26 1 1 0 1 2 1 4 1 1 1 3 12 10 45 0 3 12 5 6 1 3 0 0 0 0 5 1 2 1 2 1 0 0 9 "D_0__Eukaryota; D_1__Opisthokonta; D_2__Nucletmycea; D_3__Fungi; D_4__Glomeromycota; D_5__Incertae Sedis; D…
VTX00247 "OTU3.99282647606434e+32" 0 0 0 0 0 0 0 0 0 0 0 0 0 0 0 0 0 0 0 1 0 0 0 0 0 0 0 0 0 0 0 0 0 0 0 0 0 0 0 0 0 0 3 0 0 1 0 0 0 0 0 0 0 1 8 1 0 0 1 0 0 0 0 0 0 0 0 0 0 0 0 9 0 0 0 0 0 0 0 0 0 1 0 0 0 0 1 0 1 1 4 0 0 0 0 1 0 0 0 0 0 0 0 0 0 0 0 0 0 0 0 0 0 0 0 0 "D_0__Eukaryota; D_1__Opisthokonta; D_2__Nucletmycea; D_3__Fungi; D_4__Glomeromycota; D_5__Incertae Sedis; D_6__Glomeromycetes; D_7_…
VTX00247 "OTU5.02453821317555e+32" 5 2 24 4 10 2 26 58 14 18 9 4 0 0 0 6 20 0 4 20 140 49 0 37 0 34 4 6 0 28 2 0 0 3 51 1 9 2 0 4 94 148 125 44 80 138 80 68 0 118 159 107 0 190 244 118 145 127 154 23 125 82 1 80 93 106 123 80 112 56 51 146 134 211 62 49 74 22 70 0 7 97 198 118 16 44 170 43 63 35 124 155 29 69 44 132 7 131 122 61 70 125 30 41 1 5 0 41 34 73 22 6 63 35 0 34 "D_0__Eukaryota; D_1__Op…
VTX00247 "OTU8.46853415108679e+32" 0 0 10 0 0 0 6 18 0 0 0 0 0 0 0 0 1 0 0 1 0 0 0 2 0 9 0 1 0 0 1 0 1 0 1 0 6 0 0 0 0 1 0 0 1 1 0 4 0 0 0 0 0 0 0 1 0 0 0 0 1 2 0 0 0 0 0 0 0 1 0 0 0 0 0 0 0 2 0 0 0 0 1 0 0 0 0 0 4 3 0 0 0 0 0 0 0 0 0 0 0 0 0 0 0 0 0 0 0 0 0 0 0 0 0 0 "D_0__Eukaryota; D_1__Opisthokonta; D_2__Nucletmycea; D_3__Fungi; D_4__Glomeromycota; D_5__Incertae Sedis; D_6__Glomeromycetes; D_…
VTX00247 "OTU9.74425857315431e+32" 6 9 68 5 9 3 47 145 16 13 25 0 2 0 0 7 79 0 8 78 139 26 2 39 1 102 7 9 2 22 9 7 1 5 128 4 24 13 0 2 32 160 148 16 100 127 84 77 0 107 116 35 0 89 120 72 95 43 217 15 289 31 1 138 34 56 154 84 153 250 34 22 27 124 113 67 74 54 72 2 3 37 65 75 34 17 69 14 347 149 54 36 59 51 45 313 4 93 65 50 35 13 9 20 5 5 0 53 15 70 28 1 38 27 0 47 "D_0__Eukaryota; D_1__Opisthok…
VTX00247 "OTU7.94367703730078e+32" 1 2 14 1 2 2 9 12 5 0 7 0 0 0 0 6 14 0 1 7 26 2 0 1 0 20 1 1 0 2 3 0 0 1 7 0 4 1 0 1 10 43 34 1 17 14 22 12 0 16 30 13 0 11 20 12 17 7 43 3 17 5 0 30 8 13 17 17 48 51 7 5 2 22 22 13 9 10 16 0 0 8 13 10 4 5 19 10 31 43 21 12 21 24 9 33 1 12 19 6 3 4 1 2 0 0 0 3 0 1 2 0 5 6 0 8 "D_0__Eukaryota; D_1__Opisthokonta; D_2__Nucletmycea; D_3__Fungi; D_4__Glomeromycota; D…
VTX00247 "OTU2.93512376175688e+32" 0 0 1 0 0 0 0 3 1 0 0 0 0 0 0 0 0 0 0 3 4 1 0 0 0 2 0 0 0 0 1 0 0 0 1 0 0 0 0 0 5 9 1 0 0 7 0 0 0 1 1 0 1 1 2 2 0 0 5 0 13 1 0 2 1 0 1 0 2 1 2 0 0 5 2 0 0 1 0 0 0 1 1 0 4 0 0 0 5 0 0 2 0 0 0 2 0 1 0 1 0 0 0 0 0 0 0 1 0 0 0 0 0 0 1 0 "D_0__Eukaryota; D_1__Opisthokonta; D_2__Nucletmycea; D_3__Fungi; D_4__Glomeromycota; D_5__Incertae Sedis; D_6__Glomeromycetes; D_7…
VTX00247 "OTU8.76580910157923e+32" 1 1 1 2 11 0 5 1 2 19 0 0 7 0 0 0 3 0 5 1 60 21 0 42 0 2 0 5 0 16 3 6 0 0 13 1 2 0 1 2 9 36 31 1 20 19 3 16 0 18 12 21 0 11 51 7 9 16 48 5 14 6 0 46 2 29 99 0 59 13 12 0 3 17 14 5 27 3 26 1 1 23 11 31 4 0 55 20 21 28 62 65 10 150 12 28 1 106 46 9 6 4 0 6 0 0 0 3 3 7 0 0 0 0 0 0 "D_0__Eukaryota; D_1__Opisthokonta; D_2__Nucletmycea; D_3__Fungi; D_4__Glomeromycota;…
VTX00247 "OTU8.48883071067124e+32" 1 9 11 5 5 1 63 10 14 17 0 0 1 0 7 14 1 0 4 2 1 2 0 34 0 13 8 20 0 5 2 4 3 4 4 0 12 0 1 0 4 0 5 0 0 11 1 5 0 3 7 15 0 12 4 0 0 5 6 1 9 7 0 2 3 3 14 0 5 0 0 0 1 2 2 2 2 12 10 0 0 3 3 1 0 0 8 0 16 15 16 1 0 19 1 0 0 32 3 3 1 1 0 1 0 0 0 0 0 1 0 0 0 0 1 0 "D_0__Eukaryota; D_1__Opisthokonta; D_2__Nucletmycea; D_3__Fungi; D_4__Glomeromycota; D_5__Incertae Sedis; D_6_…
VTX00247 "OTU2.78775893073941e+31" 0 0 1 0 1 0 0 0 1 1 0 0 0 0 0 0 0 0 0 1 1 0 0 0 0 0 1 0 0 1 0 0 0 0 0 0 0 0 0 0 1 0 1 0 0 0 0 0 0 0 1 2 0 0 1 0 0 1 0 1 2 0 0 0 0 2 4 1 5 0 0 0 0 0 3 0 0 0 6 0 0 2 0 1 0 1 0 0 2 3 2 0 0 2 0 1 0 0 7 0 0 0 0 0 0 0 0 0 0 0 0 0 0 0 0 0 "D_0__Eukaryota; D_1__Opisthokonta; D_2__Nucletmycea; D_3__Fungi; D_4__Glomeromycota; D_5__Incertae Sedis; D_6__Glomeromycetes; D_7_…
VTX00255 "OTU6.78031856286065e+32" 0 0 0 0 0 0 0 0 0 0 0 0 0 0 0 0 0 0 0 0 0 0 0 0 0 0 0 0 0 0 0 0 0 0 0 0 0 0 0 0 0 0 0 0 0 0 0 0 0 0 0 0 0 0 0 0 0 0 0 0 0 0 0 0 0 0 0 0 0 0 0 0 0 0 0 0 0 0 0 0 0 0 0 0 0 0 0 0 0 0 0 0 0 0 0 0 0 0 0 1 0 0 0 0 0 0 3 0 0 0 0 0 0 0 0 0 "D_0__Eukaryota; D_1__Opisthokonta; D_2__Nucletmycea; D_3__Fungi; D_4__Glomeromycota; D_5__Incertae Sedis; D_6__Glomeromycetes; D_7_…
VTX00255 "OTU3.64297466806793e+32" 0 0 0 1 0 0 0 0 0 0 0 0 0 0 0 0 0 0 0 0 0 0 0 0 0 0 0 0 0 0 0 0 0 0 0 0 0 0 0 0 0 0 0 0 0 0 0 0 0 0 0 0 0 0 0 0 0 0 0 0 0 0 0 0 0 0 0 0 0 0 0 0 15 0 0 0 0 0 0 0 0 0 0 0 0 0 0 0 0 0 0 0 0 0 0 0 0 0 0 5 10 14 1 0 0 0 35 0 0 0 0 9 0 0 0 0 "D_0__Eukaryota; D_1__Opisthokonta; D_2__Nucletmycea; D_3__Fungi; D_4__Glomeromycota; D_5__Incertae Sedis; D_6__Glomeromycetes; …
VTX00255 "OTU9.35557787683638e+32" 0 0 0 0 0 0 0 0 0 0 0 0 0 0 0 0 0 0 0 0 0 0 0 0 0 0 0 0 0 0 0 0 0 0 0 0 0 0 0 0 0 0 0 0 0 0 0 0 0 0 0 0 0 0 0 0 0 0 0 0 0 0 0 0 0 0 0 0 0 0 0 0 0 0 0 0 0 0 0 0 0 0 0 0 0 0 0 0 0 0 0 0 0 0 0 0 0 0 0 0 1 1 0 0 0 0 0 0 0 0 0 0 0 0 0 0 "D_0__Eukaryota; D_1__Opisthokonta; D_2__Nucletmycea; D_3__Fungi; D_4__Glomeromycota; D_5__Incertae Sedis; D_6__Glomeromycetes; D_7_…
VTX00263 "OTU1.76485178257664e+32" 0 0 0 0 0 0 0 0 0 0 0 0 0 0 0 0 0 0 0 0 0 0 0 0 0 0 0 0 0 0 0 0 0 0 0 0 0 0 0 0 0 0 0 0 0 0 0 0 0 0 0 0 0 0 0 0 0 0 0 0 0 0 0 0 0 0 0 0 0 0 0 0 0 0 0 0 0 0 0 0 0 0 4 0 0 0 0 0 0 0 0 0 0 0 0 0 0 0 0 0 0 0 0 0 0 0 0 0 0 0 0 0 0 0 0 0 "D_0__Eukaryota; D_1__Opisthokonta; D_2__Nucletmycea; D_3__Fungi; D_4__Glomeromycota; D_5__Incertae Sedis; D_6__Glomeromycetes; D_7_…
VTX00263 "OTU5.85209986757587e+32" 1 3 0 2 0 0 2 2 7 2 0 0 2 1 1 1 0 1 0 0 2 1 0 0 0 0 2 0 0 2 1 0 2 0 0 0 5 0 2 52 4 1 1 7 0 0 4 4 0 1 2 0 0 63 4 2 0 3 0 38 1 5 1 0 0 12 15 0 1 3 15 6 141 0 26 2 0 16 13 0 0 5 1439 2 0 27 5 18 2 0 3 1 1 0 6 0 0 1 7 0 0 22 0 0 0 0 0 0 0 0 0 0 0 441 0 0 "D_0__Eukaryota; D_1__Opisthokonta; D_2__Nucletmycea; D_3__Fungi; D_4__Glomeromycota; D_5__Incertae Sedis; D_6__G…
VTX00276 "OTU4.04091880294896e+32" 0 0 0 0 0 0 0 0 3 0 0 0 0 0 0 0 0 0 0 0 0 0 0 0 0 0 10 0 0 0 0 0 0 0 0 0 0 0 0 0 0 0 0 0 0 0 0 0 0 0 0 0 0 0 0 0 0 0 0 0 0 0 0 0 0 0 0 0 0 0 0 0 0 0 0 0 0 0 0 0 0 0 0 0 0 0 0 0 0 0 0 0 0 0 0 0 0 0 0 3 0 0 0 0 0 0 0 0 0 0 0 0 0 0 0 0 "D_0__Eukaryota; D_1__Opisthokonta; D_2__Nucletmycea; D_3__Fungi; D_4__Glomeromycota; D_5__Incertae Sedis; D_6__Glomeromycetes; D_7…
VTX00276 "OTU7.93508370516367e+32" 0 0 0 0 34 11 6 5 0 1 0 38 0 0 0 0 0 0 0 13 3 13 0 0 0 1 11 1 0 1 10 0 0 0 17 0 0 0 0 3 1 1 4 23 5 6 4 18 8 11 10 2 3 2 0 4 9 4 0 3 134 4 375 1 0 3 1 93 1 1 0 19 732 3 0 2 193 1 6 3 6 20 0 0 0 1 1 0 4 0 0 0 4 5 6 2845 153 3 8 20 127 131 228 61 529 0 417 1906 18 1393 894 645 1020 55 131 10 "D_0__Eukaryota; D_1__Opisthokonta; D_2__Nucletmycea; D_3__Fungi; D_4__Glo…
VTX00276 "OTU3.55068660235297e+32" 0 2 8 0 4 2 5 1 0 0 1 0 0 0 0 1 1 0 1 4 0 0 0 1 0 4 6 0 0 0 2 0 0 0 7 1 0 0 0 0 0 0 0 0 0 0 0 0 0 0 0 0 0 0 0 0 0 0 0 0 0 0 0 0 0 0 0 0 0 0 0 0 0 0 0 0 0 0 0 0 0 0 0 0 0 0 0 0 0 0 0 0 0 0 0 0 0 0 0 0 0 0 0 0 0 1 0 0 0 0 0 0 0 0 0 0 "D_0__Eukaryota; D_1__Opisthokonta; D_2__Nucletmycea; D_3__Fungi; D_4__Glomeromycota; D_5__Incertae Sedis; D_6__Glomeromycetes; D_7_…
VTX00276 "OTU5.20946848681547e+32" 0 0 0 0 0 0 0 0 0 0 0 0 0 0 0 0 0 0 0 0 0 0 0 0 0 0 0 0 0 0 0 0 0 0 0 0 0 0 0 0 0 0 0 0 0 0 0 0 0 0 0 0 0 0 0 0 0 0 0 0 0 0 1 0 0 0 0 0 0 0 0 0 0 0 0 0 0 0 0 0 0 0 0 0 0 0 0 0 0 0 0 0 0 0 0 3 0 0 0 0 1 0 0 0 0 0 1 13 0 1 0 0 0 0 0 0 "D_0__Eukaryota; D_1__Opisthokonta; D_2__Nucletmycea; D_3__Fungi; D_4__Glomeromycota; D_5__Incertae Sedis; D_6__Glomeromycetes; D_7…
VTX00278 "OTU9.72273699138341e+32" 0 0 0 0 0 0 0 0 0 2 0 0 0 0 0 0 0 0 0 0 0 0 0 0 0 0 0 0 0 0 0 0 0 0 0 0 0 0 0 0 0 0 0 0 0 0 0 0 0 0 0 0 0 0 0 0 0 0 0 0 0 0 0 0 0 0 0 0 0 0 0 0 190 0 0 0 11 0 0 142 0 0 0 0 0 2 0 0 0 0 0 0 0 0 0 0 0 0 0 83 17 17 666 220 301 236 34 125 231 79 0 0 0 0 0 0 "D_0__Eukaryota; D_1__Opisthokonta; D_2__Nucletmycea; D_3__Fungi; D_4__Glomeromycota; D_5__Incertae Sedis; D_6…
VTX00278 "OTU4.01704136015457e+32" 0 0 0 0 0 0 1 0 0 7 1 150 0 0 0 0 0 0 0 0 0 107 0 0 0 1 22 0 0 7 31 0 0 0 2 1 0 2 0 0 2 0 0 0 0 0 0 1 852 18 1 0 0 3 0 0 0 0 1 0 0 93 1023 0 491 0 0 23 0 7 0 0 897 0 0 62 329 1 0 2686 785 2 10 0 0 0 0 0 0 0 1 0 0 0 0 0 1508 0 0 662 344 22 4983 4124 949 1268 809 4413 1730 1005 3963 95 298 189 1064 0 "D_0__Eukaryota; D_1__Opisthokonta; D_2__Nucletmycea; D_3__Fungi…
VTX00278 "OTU4.11199523909097e+32" 0 0 0 0 0 0 0 0 0 0 0 0 0 0 0 0 0 0 0 0 0 0 0 0 0 0 0 0 0 0 0 0 0 0 0 0 0 0 0 0 0 0 0 0 0 0 0 0 0 0 0 0 0 0 0 0 0 0 0 0 0 0 0 0 0 0 0 0 0 0 0 0 1 0 0 0 0 0 0 1 0 0 0 0 0 0 0 0 0 0 0 0 0 0 0 0 0 0 0 0 0 0 1 1 0 0 0 1 1 1 0 0 0 0 0 0 "D_0__Eukaryota; D_1__Opisthokonta; D_2__Nucletmycea; D_3__Fungi; D_4__Glomeromycota; D_5__Incertae Sedis; D_6__Glomeromycetes; D_7_…
VTX00278 "OTU1.78530592146725e+32" 0 0 0 0 0 0 0 0 0 0 0 0 0 0 0 0 0 0 0 0 0 0 0 0 0 0 0 0 0 0 0 0 0 0 0 0 0 0 0 0 0 0 0 0 0 0 0 0 0 0 0 0 0 0 0 0 0 0 0 0 0 0 0 0 0 0 0 0 0 0 0 0 11 0 0 0 0 0 0 0 7 0 0 0 0 0 0 0 0 0 0 0 0 0 0 0 10 0 0 10 1 1 44 10 0 5 9 20 25 0 37 1 0 1 6 0 "D_0__Eukaryota; D_1__Opisthokonta; D_2__Nucletmycea; D_3__Fungi; D_4__Glomeromycota; D_5__Incertae Sedis; D_6__Glomeromycet…
VTX00278 "OTU2.24781668628047e+32" 0 0 0 0 0 0 0 0 0 0 0 1 0 0 0 0 0 0 0 0 0 1 0 0 0 0 0 0 0 0 0 0 0 0 0 0 0 0 0 0 0 0 0 0 0 0 0 0 3 0 0 0 0 0 0 0 0 0 0 0 0 0 4 0 1 0 0 0 0 0 0 0 2 0 0 0 3 0 0 5 1 0 0 0 0 0 0 0 0 0 0 0 0 0 0 0 12 0 0 4 1 0 15 15 9 5 2 17 11 6 19 0 2 0 5 0 "D_0__Eukaryota; D_1__Opisthokonta; D_2__Nucletmycea; D_3__Fungi; D_4__Glomeromycota; D_5__Incertae Sedis; D_6__Glomeromycetes…
VTX00278 "OTU5.98894130162609e+32" 0 0 0 0 0 0 0 0 0 0 0 0 0 0 0 0 0 0 0 0 0 0 0 0 0 0 0 0 0 80 0 0 0 0 0 0 0 0 0 0 0 0 0 0 0 0 0 0 0 0 0 0 0 0 0 0 0 0 0 0 0 0 0 0 0 0 0 0 0 0 0 0 0 0 0 0 0 0 0 0 0 0 0 0 0 0 0 0 0 0 0 0 0 0 0 0 0 0 0 0 0 0 0 0 0 0 0 0 0 0 0 0 0 0 0 0 "D_0__Eukaryota; D_1__Opisthokonta; D_2__Nucletmycea; D_3__Fungi; D_4__Glomeromycota; D_5__Incertae Sedis; D_6__Glomeromycetes; D_7…
VTX00278 "OTU6.99737059077687e+32" 0 0 0 0 0 0 0 0 0 0 0 0 0 0 0 0 0 0 0 0 0 1 0 0 0 0 0 0 0 0 0 0 0 0 0 0 0 0 0 0 0 0 0 0 0 0 0 0 2 0 0 0 0 0 0 0 0 0 0 0 0 0 0 0 1 0 0 2 0 0 0 0 7 0 0 0 2 0 0 1 1 0 0 0 0 0 0 0 0 0 0 0 0 0 0 0 3 0 0 0 3 0 1 10 1 0 4 26 12 3 2 0 0 0 4 0 "D_0__Eukaryota; D_1__Opisthokonta; D_2__Nucletmycea; D_3__Fungi; D_4__Glomeromycota; D_5__Incertae Sedis; D_6__Glomeromycetes; D…
VTX00278 "OTU8.92886381979643e+32" 0 0 0 0 0 0 0 0 0 0 0 0 0 0 0 0 0 0 0 0 0 0 0 0 0 0 0 0 0 0 0 0 0 0 0 0 0 0 0 0 0 0 0 0 0 0 0 0 3 0 0 0 0 0 0 0 0 0 0 0 0 0 9 0 1 0 0 0 0 0 0 0 31 0 0 0 2 0 0 14 2 0 0 0 0 0 0 0 0 0 0 0 0 0 0 0 4 0 0 4 3 0 68 35 5 12 1 25 37 33 43 0 7 3 17 0 "D_0__Eukaryota; D_1__Opisthokonta; D_2__Nucletmycea; D_3__Fungi; D_4__Glomeromycota; D_5__Incertae Sedis; D_6__Glomeromyc…
VTX00278 "OTU7.76896950802286e+32" 0 0 0 0 0 0 0 0 0 0 0 0 0 0 0 0 0 0 0 0 0 0 0 0 0 0 0 0 0 0 0 0 0 0 0 0 0 0 0 0 0 0 0 0 0 0 0 0 0 0 0 0 0 0 0 0 0 0 0 0 0 0 0 0 0 0 0 0 0 0 0 0 0 0 0 0 0 0 0 0 0 0 0 0 0 0 0 0 0 0 0 0 0 0 0 0 0 0 0 0 0 0 0 0 4 0 0 0 0 0 0 7 0 0 0 0 "D_0__Eukaryota; D_1__Opisthokonta; D_2__Nucletmycea; D_3__Fungi; D_4__Glomeromycota; D_5__Incertae Sedis; D_6__Glomeromycetes; D_7_…
VTX00278 "OTU1.89292114334037e+32" 0 0 0 0 0 0 0 0 0 0 0 0 0 0 0 0 0 0 0 0 0 0 0 0 0 0 0 0 0 0 0 0 0 0 0 0 0 0 0 0 0 0 0 0 0 0 0 0 0 0 0 0 0 0 0 0 0 0 0 0 0 0 0 0 0 0 0 0 0 0 0 0 15 0 0 0 1 0 0 6 0 0 0 0 0 0 0 0 0 0 0 0 0 0 0 0 0 0 0 3 0 3 57 14 21 16 3 11 17 2 0 0 0 0 0 0 "D_0__Eukaryota; D_1__Opisthokonta; D_2__Nucletmycea; D_3__Fungi; D_4__Glomeromycota; D_5__Incertae Sedis; D_6__Glomeromycete…
VTX00278 "OTU1.77070550332328e+32" 0 0 0 0 0 0 0 0 0 0 0 0 0 0 0 0 0 0 0 0 0 4 0 0 0 0 1 0 0 0 1 0 0 0 0 0 0 0 0 0 0 0 0 0 0 0 0 0 25 0 0 0 0 0 0 0 0 0 0 0 0 3 23 0 19 0 0 2 0 0 0 0 47 0 0 5 18 0 0 52 3 0 0 0 0 0 0 0 0 0 0 0 0 0 0 0 29 0 0 25 14 2 67 93 22 26 11 125 64 92 97 5 5 1 32 0 "D_0__Eukaryota; D_1__Opisthokonta; D_2__Nucletmycea; D_3__Fungi; D_4__Glomeromycota; D_5__Incertae Sedis; D_6__…
VTX00278 "OTU4.4488618494475e+32" 0 0 0 0 0 0 0 0 0 0 0 0 0 0 0 0 0 0 0 0 0 0 0 0 0 0 0 0 0 0 0 0 0 0 0 0 0 0 0 0 0 0 0 0 0 0 0 0 0 0 0 0 1 0 0 0 0 0 0 0 0 0 0 0 0 0 0 0 0 0 0 0 1 0 0 0 0 0 0 0 0 0 0 0 0 0 0 0 0 0 0 0 0 0 0 0 0 0 0 0 0 0 0 0 0 0 0 1 0 2 0 0 0 0 1 0 "D_0__Eukaryota; D_1__Opisthokonta; D_2__Nucletmycea; D_3__Fungi; D_4__Glomeromycota; D_5__Incertae Sedis; D_6__Glomeromycetes; D_7__…
VTX00278 "OTU1.43589595987695e+32" 0 0 0 0 0 0 0 0 0 0 0 0 0 0 0 0 0 0 0 0 0 0 0 0 0 0 0 0 0 0 0 0 0 0 0 0 0 0 0 0 0 0 0 0 0 0 0 0 0 0 0 0 0 0 0 0 0 0 0 0 0 0 0 0 0 0 0 0 0 0 0 0 0 0 0 0 0 0 0 0 0 0 0 0 0 0 0 0 0 0 0 0 0 0 0 0 0 0 0 0 0 0 0 0 0 0 0 0 0 2 0 0 0 0 0 0 "D_0__Eukaryota; D_1__Opisthokonta; D_2__Nucletmycea; D_3__Fungi; D_4__Glomeromycota; D_5__Incertae Sedis; D_6__Glomeromycetes; D_7_…
VTX00278 "OTU9.89770019635166e+32" 0 0 0 0 0 0 0 0 0 0 0 4 0 0 0 0 0 0 0 0 0 8 0 0 0 0 0 0 0 0 0 0 0 0 0 0 0 0 0 0 0 0 0 0 0 0 0 0 35 1 0 0 0 0 0 0 0 0 1 0 0 5 37 0 7 0 0 1 0 0 0 0 109 0 0 1 15 0 0 46 18 0 0 0 0 0 0 0 0 0 0 0 0 0 0 0 11 0 1 16 17 0 168 105 22 10 42 53 96 47 67 9 11 3 21 0 "D_0__Eukaryota; D_1__Opisthokonta; D_2__Nucletmycea; D_3__Fungi; D_4__Glomeromycota; D_5__Incertae Sedis; D_…
VTX00278 "OTU1.5333273913452e+32" 0 0 0 0 0 0 0 0 0 0 0 0 0 0 0 0 0 0 0 0 0 0 0 0 0 0 0 0 0 0 0 0 0 0 0 0 0 0 0 0 0 0 0 0 0 0 0 0 0 0 0 0 0 0 0 0 0 0 0 0 0 0 0 0 0 0 0 0 0 0 0 0 0 0 0 0 0 0 0 0 0 0 0 0 0 0 0 0 0 0 0 0 0 0 0 0 0 0 0 0 0 0 0 0 0 0 0 0 16 0 0 0 0 0 0 0 "D_0__Eukaryota; D_1__Opisthokonta; D_2__Nucletmycea; D_3__Fungi; D_4__Glomeromycota; D_5__Incertae Sedis; D_6__Glomeromycetes; D_7_…
VTX00278 "OTU7.09301382122515e+32" 0 0 0 0 0 0 0 0 0 0 0 0 0 0 0 0 0 0 0 0 0 0 0 0 0 0 0 0 0 0 0 0 0 0 0 0 0 0 0 0 0 0 0 0 0 0 0 0 0 0 0 0 3 0 0 0 0 0 0 0 0 0 1 0 0 0 0 0 0 0 0 0 135 0 0 0 0 0 0 0 0 0 0 0 0 0 0 0 0 0 0 0 0 0 0 0 4 0 0 14 0 0 8 2 0 0 1 4 4 2 0 2 0 0 3 0 "D_0__Eukaryota; D_1__Opisthokonta; D_2__Nucletmycea; D_3__Fungi; D_4__Glomeromycota; D_5__Incertae Sedis; D_6__Glomeromycetes; D…
VTX00278 "OTU9.48754700556861e+32" 0 0 0 0 0 0 0 0 0 0 0 0 0 0 0 0 0 0 0 0 0 0 0 0 0 0 0 0 0 0 0 0 0 0 0 0 0 0 0 0 0 0 0 0 0 0 0 0 0 0 0 0 0 0 0 0 0 0 0 0 0 0 0 0 0 0 0 0 0 0 0 0 2 0 0 0 0 0 0 0 0 0 0 0 0 0 0 0 0 0 0 0 0 0 0 0 0 0 0 1 0 0 20 2 0 0 2 0 0 1 0 0 0 0 0 0 "D_0__Eukaryota; D_1__Opisthokonta; D_2__Nucletmycea; D_3__Fungi; D_4__Glomeromycota; D_5__Incertae Sedis; D_6__Glomeromycetes; D_7…
VTX00278 "OTU2.18430338315617e+32" 0 0 0 0 0 0 0 0 0 0 0 0 0 0 0 0 0 0 0 0 0 0 0 0 0 0 0 0 0 0 0 0 0 0 0 0 0 0 0 0 0 0 0 0 0 0 0 0 0 0 0 0 0 0 0 0 0 0 0 0 0 0 0 0 0 0 0 0 0 0 0 0 8 0 0 0 1 0 0 1 0 0 0 0 0 0 0 0 0 0 0 0 0 0 0 0 0 0 0 7 1 0 27 3 1 0 7 0 3 0 0 0 0 0 0 0 "D_0__Eukaryota; D_1__Opisthokonta; D_2__Nucletmycea; D_3__Fungi; D_4__Glomeromycota; D_5__Incertae Sedis; D_6__Glomeromycetes; D_7…
VTX00287 "OTU6.94640726477456e+32" 0 0 0 0 0 0 0 1 0 0 0 0 0 0 0 0 0 0 0 0 0 0 0 0 0 0 0 0 0 0 0 0 0 0 0 0 0 0 0 0 0 0 8 5 0 0 0 8 22 1 0 0 17 0 0 3 0 0 0 0 0 0 1 0 1 0 2 0 1 1 0 3 35 1 0 0 2 1 0 0 2 3 0 1 0 0 0 0 1 0 0 0 1 0 0 2 6 1 0 7 5 7 10 2 4 1 6 4 2 2 2 30 0 4 19 2 "D_0__Eukaryota; D_1__Opisthokonta; D_2__Nucletmycea; D_3__Fungi; D_4__Glomeromycota; D_5__Incertae Sedis; D_6__Glomeromycetes…
VTX00287 "OTU1.01455059223337e+32" 0 0 0 0 0 0 0 0 0 0 0 0 0 0 0 0 0 0 0 0 0 0 0 0 0 0 0 0 0 0 0 0 0 0 0 0 0 0 0 0 0 0 0 0 0 0 0 0 0 0 0 0 0 0 0 0 0 0 0 0 0 0 0 0 0 0 0 0 0 0 0 0 0 0 0 0 0 0 0 0 0 0 0 0 0 0 0 0 0 0 0 0 0 0 0 0 0 0 0 0 0 0 0 0 0 0 0 0 0 0 0 0 0 0 1 0 "D_0__Eukaryota; D_1__Opisthokonta; D_2__Nucletmycea; D_3__Fungi; D_4__Glomeromycota; D_5__Incertae Sedis; D_6__Glomeromycetes; D_7_…
VTX00287 "OTU5.26405195323495e+32" 0 0 52 0 0 0 0 0 0 0 0 0 0 0 0 0 0 0 0 0 0 0 0 0 0 0 0 0 0 0 0 0 0 0 0 0 0 0 0 0 4 1 0 0 0 0 0 0 0 0 0 0 0 54 0 1 0 0 1 69 208 85 638 0 0 0 0 0 0 1 0 0 0 0 0 0 197 0 0 0 0 0 0 132 0 0 0 0 0 1 0 0 0 0 0 0 0 0 0 43 1136 0 0 0 0 0 2176 795 266 1 0 0 4 9 1161 0 "D_0__Eukaryota; D_1__Opisthokonta; D_2__Nucletmycea; D_3__Fungi; D_4__Glomeromycota; D_5__Incertae Sedis;…
VTX00287 "OTU7.51341228521135e+32" 0 0 67 0 0 0 0 0 0 0 0 0 0 0 0 0 0 0 0 0 0 0 0 0 0 0 0 0 0 0 0 0 0 0 0 0 0 0 0 0 0 1 0 0 0 1 0 0 0 0 0 0 0 181 0 0 0 1 0 0 218 0 1 0 0 0 0 0 0 0 0 0 0 0 0 0 2 0 0 0 0 0 0 122 0 0 0 0 0 0 0 0 0 0 0 1 0 0 0 0 4 0 0 0 0 0 10 1877 1 0 0 0 62 0 1 0 "D_0__Eukaryota; D_1__Opisthokonta; D_2__Nucletmycea; D_3__Fungi; D_4__Glomeromycota; D_5__Incertae Sedis; D_6__Glomerom…
VTX00287 "OTU4.20186509277855e+32" 0 0 58 0 0 0 0 0 0 0 0 0 0 0 0 0 0 0 0 0 0 0 0 0 0 0 0 0 0 0 0 0 0 0 0 0 0 0 0 0 0 0 0 0 0 0 0 0 0 0 0 0 0 84 0 0 0 0 2 0 58 0 124 0 0 0 0 0 0 0 0 0 0 0 0 0 0 0 0 0 0 0 0 86 0 0 0 0 0 0 0 0 0 0 0 0 0 0 0 0 291 0 0 0 0 0 1 0 84 0 0 0 111 0 0 0 "D_0__Eukaryota; D_1__Opisthokonta; D_2__Nucletmycea; D_3__Fungi; D_4__Glomeromycota; D_5__Incertae Sedis; D_6__Glomeromy…
VTX00309 "OTU6.69761449131233e+32" 0 0 0 0 0 0 0 0 0 0 0 2 0 0 0 0 0 0 0 0 0 0 0 0 0 0 0 0 0 0 0 0 0 0 0 0 0 0 0 0 0 0 0 0 0 0 0 0 0 0 0 0 77 0 0 0 0 0 0 0 2 0 1 0 10 0 0 0 0 0 0 0 4 0 0 0 0 0 0 0 0 0 0 0 0 0 0 0 0 0 0 0 0 0 0 0 0 0 0 0 13 1 0 6 0 12 6 50 3 66 0 0 8 0 4 0 "D_0__Eukaryota; D_1__Opisthokonta; D_2__Nucletmycea; D_3__Fungi; D_4__Glomeromycota; D_5__Incertae Sedis; D_6__Glomeromycetes…
VTX00309 "OTU6.56554253480671e+32" 0 0 0 0 0 0 0 0 0 0 0 0 0 0 0 0 0 0 0 0 0 0 0 0 0 0 0 0 0 0 0 0 0 0 0 0 0 0 0 0 0 0 0 0 0 0 0 0 0 0 0 0 230 0 0 0 0 0 0 0 1 0 1 0 3 0 0 0 0 0 0 0 11 0 0 0 0 0 0 0 0 0 0 0 0 0 0 0 0 0 0 0 0 0 0 0 0 0 0 0 43 2 0 5 0 46 1 65 4 107 0 0 8 0 4 0 "D_0__Eukaryota; D_1__Opisthokonta; D_2__Nucletmycea; D_3__Fungi; D_4__Glomeromycota; D_5__Incertae Sedis; D_6__Glomeromycet…
VTX00309 "OTU7.37929372570534e+31" 0 0 0 0 0 0 0 0 0 0 0 0 0 0 0 0 0 0 0 0 0 0 0 0 0 0 0 0 0 0 0 0 0 0 0 0 0 0 0 0 0 0 0 0 0 0 0 0 0 0 0 0 0 0 0 0 0 0 0 0 0 0 0 0 0 0 0 0 0 0 0 0 0 0 0 0 0 0 0 0 0 0 0 0 0 0 0 0 0 0 0 0 0 0 0 0 0 0 0 0 0 0 0 0 0 0 0 2 0 3 0 0 1 0 0 0 "D_0__Eukaryota; D_1__Opisthokonta; D_2__Nucletmycea; D_3__Fungi; D_4__Glomeromycota; D_5__Incertae Sedis; D_6__Glomeromycetes; D_7_…
VTX00309 "OTU7.10151498775083e+32" 0 0 0 0 0 0 0 0 0 0 0 0 0 0 0 0 0 0 0 0 0 0 0 0 0 0 0 0 0 0 0 0 0 0 0 0 0 0 0 0 0 0 0 0 0 0 0 0 0 0 0 0 0 0 0 0 0 0 0 0 0 0 0 0 9 0 0 0 0 0 0 0 0 0 0 0 0 0 0 0 0 0 0 0 0 0 0 0 0 0 0 0 0 0 0 0 0 0 0 0 0 0 0 0 0 0 0 0 0 7 0 0 0 0 0 0 "D_0__Eukaryota; D_1__Opisthokonta; D_2__Nucletmycea; D_3__Fungi; D_4__Glomeromycota; D_5__Incertae Sedis; D_6__Glomeromycetes; D_7_…
VTX00309 "OTU4.53654194098263e+32" 0 0 0 0 0 0 6 0 0 0 0 0 0 0 0 0 0 0 0 0 0 1 0 0 0 0 0 0 0 0 0 0 0 0 0 0 0 0 0 0 0 0 0 0 0 0 0 2 0 1 0 0 1 0 0 0 0 0 2 0 0 0 0 0 5 0 0 1 1 0 0 0 0 0 0 0 1 0 0 0 0 0 0 0 0 0 0 0 0 0 0 0 0 0 0 0 0 0 0 1 68 9 0 0 0 2 0 21 2 17 0 0 5 0 1 0 "D_0__Eukaryota; D_1__Opisthokonta; D_2__Nucletmycea; D_3__Fungi; D_4__Glomeromycota; D_5__Incertae Sedis; D_6__Glomeromycetes; D…
VTX00309 "OTU5.81599422532488e+32" 1 0 0 0 0 0 0 0 0 0 0 55 0 0 0 0 0 0 0 1 0 0 1 0 0 2 0 0 0 1 0 0 0 0 0 0 0 1 0 0 0 0 0 1 0 0 0 0 0 0 0 0 2421 0 1 0 1 1 4 0 96 0 128 0 1559 0 0 0 0 2 0 0 151 0 1 0 2 0 0 0 0 0 0 0 0 0 0 1 1 0 0 0 0 0 0 0 0 0 0 0 2397 166 0 208 0 1995 272 4985 226 1783 0 0 446 0 224 1 "D_0__Eukaryota; D_1__Opisthokonta; D_2__Nucletmycea; D_3__Fungi; D_4__Glomeromycota; D_5__Incer…
VTX00309 "OTU7.13312549308426e+32" 0 0 0 0 0 0 0 0 0 0 0 0 0 0 0 0 0 0 0 0 0 0 0 0 0 0 0 0 0 0 0 0 0 0 0 0 0 0 0 0 0 0 0 0 0 0 0 0 0 0 0 0 0 0 0 0 0 0 0 0 0 0 0 0 0 0 0 0 0 0 0 0 0 0 0 0 0 0 0 0 0 0 0 0 0 0 0 0 0 0 0 0 0 0 0 0 0 0 0 0 0 0 0 0 0 0 0 0 0 1 0 0 0 0 0 0 "D_0__Eukaryota; D_1__Opisthokonta; D_2__Nucletmycea; D_3__Fungi; D_4__Glomeromycota; D_5__Incertae Sedis; D_6__Glomeromycetes; D_7_…
VTX00309 "OTU8.69808738105604e+31" 0 0 0 0 1 0 0 0 0 0 0 0 0 0 0 0 0 0 0 0 0 0 0 0 0 0 0 0 0 0 0 0 0 0 0 0 0 0 0 0 0 0 0 0 0 0 0 0 0 0 0 0 821 0 0 0 0 0 1 0 0 0 0 0 397 0 0 0 0 0 0 0 0 1 0 0 71 0 0 0 0 0 0 0 0 0 0 0 1 1 0 0 0 0 0 0 0 1 0 0 166 0 0 3 0 6 0 97 1 4 0 1 154 0 2 0 "D_0__Eukaryota; D_1__Opisthokonta; D_2__Nucletmycea; D_3__Fungi; D_4__Glomeromycota; D_5__Incertae Sedis; D_6__Glomeromyc…
VTX00309 "OTU4.86309929518388e+32" 0 0 0 0 0 2 0 0 0 0 0 0 0 0 0 0 0 0 0 0 0 0 0 0 0 0 0 0 0 0 0 0 0 0 0 0 0 0 0 0 0 0 0 0 0 0 0 0 0 0 0 0 20 0 0 0 0 0 1 0 1 0 0 0 53 0 0 0 0 0 0 0 0 0 0 0 1 0 0 0 0 0 0 0 0 0 0 0 0 0 0 0 0 0 0 0 0 0 0 0 219 47 0 0 0 4 0 437 0 346 0 161 93 0 0 0 "D_0__Eukaryota; D_1__Opisthokonta; D_2__Nucletmycea; D_3__Fungi; D_4__Glomeromycota; D_5__Incertae Sedis; D_6__Glomerom…
VTX00309 "OTU4.30060994762922e+32" 0 0 0 0 0 0 0 0 0 0 0 0 0 0 0 0 0 0 0 0 0 0 0 0 0 0 0 0 0 0 0 0 0 0 0 0 0 0 0 0 0 0 0 0 0 0 0 0 0 0 0 0 1 0 0 0 0 0 0 0 0 0 0 0 1 0 0 0 0 0 0 0 0 0 0 0 20 0 0 0 0 0 0 0 0 0 0 0 0 0 0 0 0 0 0 0 0 0 0 0 1 1 0 0 0 1 0 0 0 1 0 0 0 0 0 0 "D_0__Eukaryota; D_1__Opisthokonta; D_2__Nucletmycea; D_3__Fungi; D_4__Glomeromycota; D_5__Incertae Sedis; D_6__Glomeromycetes; D_7…
VTX00309 "OTU9.55013859624937e+32" 0 0 0 0 0 0 0 0 0 0 0 0 0 0 0 0 0 0 0 0 0 0 0 0 0 0 0 0 0 0 0 0 0 0 0 0 0 0 0 0 0 0 0 0 0 1 0 0 0 0 0 0 11 0 0 0 0 0 0 0 0 0 0 0 6 0 0 0 0 0 0 0 1 0 0 0 0 0 0 0 0 0 0 0 0 0 0 0 0 0 0 0 0 0 0 0 0 0 0 0 5 1 0 0 0 3 0 10 1 23 0 0 0 0 3 0 "D_0__Eukaryota; D_1__Opisthokonta; D_2__Nucletmycea; D_3__Fungi; D_4__Glomeromycota; D_5__Incertae Sedis; D_6__Glomeromycetes; D…
VTX00309 "OTU6.79531223341339e+32" 0 0 0 0 0 0 0 0 0 0 0 0 0 0 0 0 0 0 0 0 0 0 0 0 0 0 0 0 0 0 0 0 0 0 0 0 0 0 0 0 0 0 0 0 0 0 0 0 0 0 0 0 0 0 0 0 0 0 0 0 0 0 0 0 1 0 0 0 0 0 0 0 0 0 0 0 0 0 0 0 0 0 0 0 0 0 0 0 0 0 0 0 0 0 0 0 0 0 0 0 4 0 0 0 0 0 0 0 0 2 0 0 6 0 0 0 "D_0__Eukaryota; D_1__Opisthokonta; D_2__Nucletmycea; D_3__Fungi; D_4__Glomeromycota; D_5__Incertae Sedis; D_6__Glomeromycetes; D_7_…
VTX00318 "OTU9.46613827371742e+32" 0 0 0 0 0 0 0 1 0 0 0 0 0 0 0 0 0 0 0 0 0 0 0 0 0 0 0 0 0 0 0 0 0 0 0 0 0 0 0 0 0 0 0 0 0 0 0 0 0 0 0 0 30 0 0 0 0 0 0 0 0 0 6 0 0 0 0 0 0 0 0 0 9 0 0 0 5 0 0 0 15 0 0 0 0 0 0 0 0 0 0 0 0 0 0 0 9 0 0 13 3 7 21 13 0 11 6 8 70 0 17 2 0 15 19 0 "D_0__Eukaryota; D_1__Opisthokonta; D_2__Nucletmycea; D_3__Fungi; D_4__Glomeromycota; D_5__Incertae Sedis; D_6__Glomeromyc…
VTX00318 "OTU9.68779767608854e+32" 11 4 0 25 2 0 0 15 0 1 0 0 0 0 0 0 0 0 0 0 0 0 0 0 0 0 19 0 0 0 0 0 1 0 0 55 0 0 0 0 0 0 0 0 0 0 0 0 0 0 0 0 928 3 0 0 0 0 0 0 0 0 241 0 0 0 0 1 0 0 0 0 265 0 0 0 333 0 0 0 763 0 0 0 0 0 0 0 1 0 0 0 0 0 0 0 456 0 0 389 184 341 853 341 23 408 561 572 959 0 1205 174 33 791 1272 0 "D_0__Eukaryota; D_1__Opisthokonta; D_2__Nucletmycea; D_3__Fungi; D_4__Glomeromycota;…
VTX00318 "OTU6.50386075882096e+32" 0 0 0 0 0 0 0 0 0 0 0 0 0 0 0 0 0 0 0 0 0 0 0 0 0 0 0 0 0 0 0 0 0 0 0 0 0 0 0 0 0 0 0 0 0 0 0 0 0 0 0 0 0 0 0 0 0 0 0 0 0 0 0 0 0 0 0 0 0 0 0 0 0 0 0 0 0 0 0 0 0 0 0 0 0 0 0 0 0 0 0 0 0 0 0 0 0 0 0 1 1 0 4 3 0 0 0 0 0 0 8 0 0 0 2 0 "D_0__Eukaryota; D_1__Opisthokonta; D_2__Nucletmycea; D_3__Fungi; D_4__Glomeromycota; D_5__Incertae Sedis; D_6__Glomeromycetes; D_7_…
VTX00326 "OTU3.43369312258186e+32" 0 0 0 0 0 1 0 0 0 0 0 0 0 0 0 0 0 0 0 0 0 0 0 0 0 0 0 0 0 0 0 0 0 0 0 0 0 0 0 0 0 11 2 0 0 0 0 0 0 0 0 159 0 0 6 0 0 0 0 0 0 0 0 0 3 0 0 0 0 0 0 2 0 0 0 0 0 0 0 0 0 0 0 0 1 0 0 0 0 0 0 1 0 0 0 0 0 0 0 0 0 0 0 0 0 0 0 0 0 0 0 0 0 0 0 0 "D_0__Eukaryota; D_1__Opisthokonta; D_2__Nucletmycea; D_3__Fungi; D_4__Glomeromycota; D_5__Incertae Sedis; D_6__Glomeromycetes; D…
VTX00326 "OTU5.04403943954564e+32" 0 0 0 0 0 4 0 3 0 0 0 0 0 0 0 0 0 0 0 0 0 0 0 0 0 0 2 0 0 5 1 0 0 0 0 1 0 0 0 0 20 0 10 5 0 0 3 0 11 9 20 32 0 0 14 0 0 0 0 4 27 21 0 0 1 0 0 2 0 0 0 3 3 6 0 3 0 5 0 0 0 2 24 0 0 0 1 2 0 0 0 3 1 0 2 2 0 1 0 5 1 0 0 0 0 0 0 0 0 0 0 0 0 0 0 0 "D_0__Eukaryota; D_1__Opisthokonta; D_2__Nucletmycea; D_3__Fungi; D_4__Glomeromycota; D_5__Incertae Sedis; D_6__Glomeromyce…
VTX00326 "OTU5.16170927173683e+32" 0 0 0 0 0 0 0 0 0 0 0 0 0 0 0 0 0 0 0 0 0 0 0 0 0 0 0 0 0 0 0 0 0 0 0 0 0 0 0 0 0 0 1 0 0 0 0 0 0 0 0 1 0 0 0 0 0 0 0 0 0 0 0 0 0 0 0 0 0 0 0 0 0 0 0 0 0 0 0 0 0 0 0 0 0 0 0 0 0 0 0 0 0 0 0 0 0 0 0 0 0 0 0 0 0 0 0 0 0 0 0 0 0 0 0 0 "D_0__Eukaryota; D_1__Opisthokonta; D_2__Nucletmycea; D_3__Fungi; D_4__Glomeromycota; D_5__Incertae Sedis; D_6__Glomeromycetes; D_7_…
VTX00326 "OTU6.36541741865933e+32" 0 0 0 0 0 0 0 0 0 0 0 0 0 0 0 0 0 0 0 0 0 0 0 0 0 0 0 0 0 0 0 0 0 0 0 0 0 0 0 0 2 1 0 0 0 0 0 0 0 0 0 7 0 0 0 0 0 0 0 0 0 0 0 0 0 0 0 0 0 0 0 0 0 0 0 0 0 0 0 0 0 0 0 0 0 0 0 0 0 0 0 0 0 0 0 0 0 1 0 0 0 0 0 0 0 0 0 0 0 0 0 0 0 0 0 0 "D_0__Eukaryota; D_1__Opisthokonta; D_2__Nucletmycea; D_3__Fungi; D_4__Glomeromycota; D_5__Incertae Sedis; D_6__Glomeromycetes; D_7_…
VTX00326 "OTU2.7175094641688e+32" 0 0 0 0 0 1 0 4 0 0 0 0 0 1 0 0 0 0 0 0 0 0 0 1 0 0 0 0 0 2 0 0 0 1 0 0 0 0 0 0 41 0 58 0 1 0 0 0 1 13 63 66 0 0 9 0 0 0 0 7 15 8 0 0 0 0 0 4 0 0 0 0 0 8 0 6 0 16 1 0 0 2 9 0 6 0 4 1 0 0 0 0 16 0 4 11 0 1 0 10 0 0 0 0 0 0 0 0 0 0 0 0 0 0 0 0 "D_0__Eukaryota; D_1__Opisthokonta; D_2__Nucletmycea; D_3__Fungi; D_4__Glomeromycota; D_5__Incertae Sedis; D_6__Glomeromyce…
VTX00333 "OTU4.150631410979e+32" 0 0 0 0 0 0 3 0 0 0 0 0 0 0 0 0 0 0 0 0 0 0 0 2 0 0 0 0 0 6 0 0 0 0 0 1 0 0 0 0 1 0 0 1 0 0 0 0 2 2 2 75 0 0 0 0 0 0 0 0 6 7 0 0 0 0 0 0 0 0 0 2 0 1 0 3 0 4 1 0 0 0 3 0 4 0 1 0 0 0 0 0 3 2 0 0 0 1 0 0 0 0 0 0 0 0 0 0 0 0 0 0 0 0 0 0 "D_0__Eukaryota; D_1__Opisthokonta; D_2__Nucletmycea; D_3__Fungi; D_4__Glomeromycota; D_5__Incertae Sedis; D_6__Glomeromycetes; D_7__…
VTX00340 "OTU2.69899308149832e+32" 0 0 0 0 0 2 0 0 0 0 0 0 0 0 0 0 0 0 0 0 0 0 0 0 3 0 0 1 0 0 0 0 0 0 0 0 0 0 0 0 0 0 0 0 0 0 0 0 0 25 0 5 0 0 0 0 0 0 0 38 0 0 0 0 0 0 0 0 0 0 0 0 0 0 0 0 0 0 0 0 0 0 0 0 0 0 0 0 0 0 0 0 0 0 15 0 0 0 0 3 0 0 0 0 0 0 0 0 0 0 0 0 0 0 0 0 "D_0__Eukaryota; D_1__Opisthokonta; D_2__Nucletmycea; D_3__Fungi; D_4__Glomeromycota; D_5__Incertae Sedis; D_6__Glomeromycetes; D…
VTX00340 "OTU4.09353618776223e+31" 2 1 0 3 9 4 2 5 0 2 0 0 0 0 0 0 0 0 0 1 0 0 0 37 2 3 4 1 0 26 0 0 0 0 5 0 0 1 0 0 0 0 0 0 0 0 0 0 0 0 0 0 0 0 0 0 0 0 0 0 18 0 0 0 0 0 0 0 0 0 0 0 0 0 0 0 0 0 0 0 0 0 0 3 0 0 0 0 0 0 0 0 0 0 0 0 0 0 0 0 0 0 0 0 0 0 0 0 0 0 0 0 0 0 0 0 "D_0__Eukaryota; D_1__Opisthokonta; D_2__Nucletmycea; D_3__Fungi; D_4__Glomeromycota; D_5__Incertae Sedis; D_6__Glomeromycetes; D…
VTX00340 "OTU8.66079470838695e+32" 0 0 0 0 0 0 0 0 0 0 0 0 0 0 0 0 0 0 0 0 0 0 0 2 0 0 0 0 0 2 0 0 0 0 0 0 0 0 0 0 0 0 0 0 0 0 0 0 0 0 0 0 0 0 0 0 0 0 0 0 0 0 0 0 0 0 0 0 0 0 0 0 0 0 0 0 0 0 0 0 0 0 0 0 0 0 0 0 0 0 0 0 0 0 0 0 0 0 0 0 0 0 0 0 0 0 0 0 0 0 0 0 0 0 0 0 "D_0__Eukaryota; D_1__Opisthokonta; D_2__Nucletmycea; D_3__Fungi; D_4__Glomeromycota; D_5__Incertae Sedis; D_6__Glomeromycetes; D_7_…
VTX00342 "OTU7.45709379885334e+32" 0 0 0 0 0 0 0 4 0 0 0 0 0 0 0 0 1 0 0 0 2 0 0 2 0 0 0 0 0 0 0 0 0 0 0 0 0 0 0 0 1 0 2 0 4 2 0 1 0 15 0 1 0 4 7 0 3 4 3 0 7 0 0 0 0 1 11 0 16 5 1 3 0 0 0 0 0 0 2 0 0 1 0 0 0 0 2 0 11 9 16 8 0 6 2 6 1 0 1 2 0 0 0 0 0 0 0 0 0 0 0 0 0 0 0 0 "D_0__Eukaryota; D_1__Opisthokonta; D_2__Nucletmycea; D_3__Fungi; D_4__Glomeromycota; D_5__Incertae Sedis; D_6__Glomeromycetes;…
VTX00344 "OTU3.14958715905998e+32" 1 2 24 2 0 1 8 18 8 5 3 0 0 0 0 2 2 0 0 3 11 1 0 11 0 19 12 3 0 6 1 0 0 0 13 0 15 0 1 1 14 10 7 5 4 16 24 15 0 6 12 2 0 16 10 16 13 16 9 9 8 19 0 2 4 15 32 4 11 15 16 8 7 14 27 5 8 7 21 0 0 7 14 17 0 18 18 9 9 6 18 5 7 4 19 4 1 4 34 11 3 13 4 4 1 0 0 3 3 0 1 0 4 3 0 3 "D_0__Eukaryota; D_1__Opisthokonta; D_2__Nucletmycea; D_3__Fungi; D_4__Glomeromycota; D_5__Ince…
VTX00344 "OTU7.57393417225213e+32" 1 3 132 15 13 6 118 165 57 51 27 8 0 0 1 4 99 0 0 52 196 22 0 65 1 237 51 10 1 80 5 1 3 0 169 1 80 7 1 2 79 65 103 37 165 241 78 105 0 129 238 29 0 180 225 159 251 189 173 16 111 77 3 41 107 66 125 140 172 53 39 97 95 287 46 75 95 31 107 6 6 76 213 184 0 36 293 30 108 85 153 92 46 119 35 165 11 135 120 116 104 81 31 90 1 6 0 47 43 50 45 11 119 24 0 56 "D_0__Euka…
VTX00366 "OTU3.51225925780238e+32" 7 10 126 9 5 3 21 81 1 2 3 0 0 0 0 0 2 0 4 434 0 0 0 7 0 22 8 3 1 5 2 1 6 1 8 0 11 0 0 0 0 0 132 0 740 6 0 0 0 0 0 0 0 0 0 0 0 1 0 0 18 55 0 0 0 0 0 0 0 0 0 0 0 0 1 73 1 0 0 0 0 0 2 0 0 0 0 0 0 0 14 1 0 0 0 0 0 0 0 1 0 0 0 0 0 0 0 0 0 0 0 15 0 9 3 0 "D_0__Eukaryota; D_1__Opisthokonta; D_2__Nucletmycea; D_3__Fungi; D_4__Glomeromycota; D_5__Incertae Sedis; D_6__Gl…
VTX00366 "OTU6.52370560711905e+32" 0 0 0 0 0 0 0 1 0 0 0 0 0 0 0 0 0 0 0 2 0 0 0 0 0 0 0 0 0 0 0 1 0 0 0 0 0 0 0 0 0 0 0 0 0 0 0 0 0 0 0 0 0 0 0 0 0 0 0 0 0 0 0 0 0 0 0 0 0 0 0 0 0 0 0 0 0 0 0 0 0 0 0 0 0 0 0 0 0 0 0 0 0 0 0 0 0 0 0 0 0 0 0 0 0 0 0 0 0 0 0 0 0 0 0 0 "D_0__Eukaryota; D_1__Opisthokonta; D_2__Nucletmycea; D_3__Fungi; D_4__Glomeromycota; D_5__Incertae Sedis; D_6__Glomeromycetes; D_7_…
VTX00380 "OTU4.76558918434005e+32" 0 9 0 5 22 0 4 4 13 26 0 0 2 2 4 0 0 0 0 0 5 133 0 66 0 0 8 14 0 36 2 2 3 2 1 0 9 0 14 23 67 14 4 26 2 0 1 4 0 14 0 40 0 45 16 43 1 21 1 138 18 90 1 3 0 98 95 0 3 5 54 10 0 0 22 0 0 116 28 0 0 73 5 2 19 11 19 179 4 4 14 50 10 6 67 1 0 8 57 0 1 0 0 0 0 0 0 0 0 0 0 0 0 1 0 0 "D_0__Eukaryota; D_1__Opisthokonta; D_2__Nucletmycea; D_3__Fungi; D_4__Glomeromycota; D_5_…
VTX00380 "OTU4.33208972205438e+32" 0 0 0 0 1 0 9 0 53 2 0 0 0 0 0 2 0 0 0 0 12 0 0 1 0 0 5 6 0 5 0 0 3 0 0 0 24 1 0 0 20 14 5 8 0 27 69 1 1 0 2 177 0 2 983 1 12 18 0 3 3 4 0 0 47 2 0 0 1 18 8 2 0 27 12 373 0 1 6 0 2 0 36 387 0 0 9 7 6 131 3 5 0 1 5 0 0 14 3 3 9 10 0 0 0 0 10 0 0 0 0 0 0 0 0 0 "D_0__Eukaryota; D_1__Opisthokonta; D_2__Nucletmycea; D_3__Fungi; D_4__Glomeromycota; D_5__Incertae Sedis…
VTX00380 "OTU5.919757323841e+32" 4 1 0 1 0 0 4 6 20 4 0 0 3 0 0 2 0 0 0 0 8 6 0 7 0 2 7 4 0 14 4 0 1 0 0 0 23 0 0 3 15 24 11 15 0 12 8 5 0 0 9 4 0 10 6 12 8 2 1 7 9 8 0 1 1 18 28 0 1 27 34 10 0 19 46 0 0 29 13 0 0 12 28 2 1 23 16 22 21 7 9 6 6 1 18 0 0 13 24 0 0 0 0 0 0 0 0 0 0 0 0 0 0 1 0 0 "D_0__Eukaryota; D_1__Opisthokonta; D_2__Nucletmycea; D_3__Fungi; D_4__Glomeromycota; D_5__Incertae Sedis;…
VTX00380 "OTU9.54999105865838e+32" 1 2 0 0 0 0 17 2 15 4 0 0 1 0 1 2 0 0 0 0 39 0 0 5 0 4 7 5 0 9 0 0 0 0 1 1 21 0 0 3 22 25 6 18 2 12 12 6 0 0 5 6 0 10 4 79 12 17 0 59 29 27 0 1 1 18 10 0 7 14 21 5 3 21 31 1 0 22 16 0 0 9 111 11 0 8 20 48 17 17 3 12 5 0 9 0 0 21 29 0 0 0 0 0 0 0 0 0 0 0 0 0 0 0 0 0 "D_0__Eukaryota; D_1__Opisthokonta; D_2__Nucletmycea; D_3__Fungi; D_4__Glomeromycota; D_5__Incerta…
VTX00402 "OTU7.08381126041687e+32" 0 0 0 0 0 0 0 0 0 0 0 0 0 0 0 0 0 0 0 0 0 0 0 2 0 0 1 0 0 0 0 0 0 0 0 0 0 0 0 0 0 0 0 0 0 0 0 0 0 0 0 0 0 1 0 0 0 0 2 0 0 0 0 0 0 0 0 0 0 0 0 0 0 1 0 1 0 0 0 0 0 0 1 0 0 0 0 0 0 0 0 0 0 0 0 0 0 0 0 0 0 0 0 0 0 0 0 0 0 0 0 0 0 0 0 0 "D_0__Eukaryota; D_1__Opisthokonta; D_2__Nucletmycea; D_3__Fungi; D_4__Glomeromycota; D_5__Incertae Sedis; D_6__Glomeromycetes; D_7_…
VTX00402 "OTU5.51869899685176e+32" 0 0 0 0 0 0 0 0 0 0 0 0 0 0 0 0 0 0 0 0 0 0 0 0 0 0 0 0 0 0 0 0 0 0 0 0 0 0 0 0 0 0 0 0 0 0 0 0 0 0 0 0 0 0 0 0 0 0 0 0 0 0 0 0 0 0 0 0 0 0 0 0 0 0 0 0 0 0 0 0 0 0 0 0 0 0 0 0 0 0 0 0 0 0 0 0 0 0 0 0 0 0 0 0 0 0 0 0 1 0 0 0 0 0 0 0 "D_0__Eukaryota; D_1__Opisthokonta; D_2__Nucletmycea; D_3__Fungi; D_4__Glomeromycota; D_5__Incertae Sedis; D_6__Glomeromycetes; D_7_…
VTX00402 "OTU5.446258238014e+32" 0 1 0 0 0 0 0 0 0 0 0 0 0 0 0 0 0 0 0 0 0 0 0 0 0 0 0 0 0 0 0 0 0 0 0 0 0 0 0 0 0 0 0 0 0 0 0 1 0 0 0 0 0 0 0 0 0 0 0 0 0 0 0 0 0 0 0 0 0 0 0 0 0 0 0 0 0 0 0 0 0 0 0 0 0 0 0 0 0 0 0 2 0 0 0 0 0 0 0 0 0 0 0 0 0 0 0 0 0 0 0 0 0 0 0 0 "D_0__Eukaryota; D_1__Opisthokonta; D_2__Nucletmycea; D_3__Fungi; D_4__Glomeromycota; D_5__Incertae Sedis; D_6__Glomeromycetes; D_7__G…
VTX00402 "OTU3.61254229711562e+32" 0 0 0 0 0 0 0 0 0 0 0 0 0 0 0 0 0 0 0 0 0 0 0 0 0 0 0 0 0 0 0 0 0 0 0 0 0 0 0 0 0 0 0 0 0 0 0 0 0 0 0 0 0 0 0 0 0 0 1 0 0 0 0 0 0 0 0 0 0 0 0 0 0 0 0 0 0 0 0 0 0 0 0 0 0 0 0 0 0 0 0 0 0 0 0 0 0 1 0 0 0 0 0 0 0 0 0 0 0 0 0 0 0 0 0 0 "D_0__Eukaryota; D_1__Opisthokonta; D_2__Nucletmycea; D_3__Fungi; D_4__Glomeromycota; D_5__Incertae Sedis; D_6__Glomeromycetes; D_7_…
VTX00402 "OTU2.80698300541378e+32" 0 0 0 0 0 0 0 0 0 0 0 0 0 0 0 0 0 0 0 0 0 0 0 0 0 0 0 0 0 0 0 0 0 0 0 0 0 0 0 0 0 0 0 0 0 0 0 0 0 0 0 0 0 0 0 0 0 0 0 0 0 0 0 0 0 0 0 0 0 0 0 0 0 0 0 0 0 0 0 0 0 0 0 1 0 0 0 0 0 0 0 0 0 0 0 0 0 0 0 0 0 0 0 1 0 0 0 0 0 0 0 0 0 0 0 0 "D_0__Eukaryota; D_1__Opisthokonta; D_2__Nucletmycea; D_3__Fungi; D_4__Glomeromycota; D_5__Incertae Sedis; D_6__Glomeromycetes; D_7_…
VTX00402 "OTU3.75640735140692e+32" 0 0 0 0 1 0 0 0 0 0 0 0 0 0 0 0 0 0 0 0 0 0 0 2 0 0 0 0 0 0 0 0 0 0 0 0 0 0 0 0 0 0 0 0 0 0 0 0 0 0 0 0 0 0 0 0 0 0 0 0 0 0 0 0 0 0 0 0 0 0 0 0 0 0 0 0 0 0 0 0 0 0 0 0 0 0 0 0 0 0 0 0 0 0 0 0 0 1 0 0 0 0 0 0 0 0 0 0 0 0 0 0 0 0 1 0 "D_0__Eukaryota; D_1__Opisthokonta; D_2__Nucletmycea; D_3__Fungi; D_4__Glomeromycota; D_5__Incertae Sedis; D_6__Glomeromycetes; D_7_…
VTX00402 "OTU7.71431330787163e+32" 0 0 0 0 0 0 0 0 0 0 0 0 0 0 0 0 0 0 0 0 0 0 0 0 0 0 0 0 0 0 0 0 0 0 0 0 0 0 0 0 0 0 0 0 0 0 0 0 0 0 1 0 0 0 0 0 0 2 0 0 0 0 0 0 0 0 0 0 0 0 0 0 0 0 0 0 0 0 0 0 0 0 0 0 0 0 0 0 0 0 0 1 0 0 0 0 0 0 0 0 0 0 0 0 0 0 0 0 0 0 0 0 0 0 0 0 "D_0__Eukaryota; D_1__Opisthokonta; D_2__Nucletmycea; D_3__Fungi; D_4__Glomeromycota; D_5__Incertae Sedis; D_6__Glomeromycetes; D_7_…
VTX00402 "OTU6.08923773221822e+32" 0 0 0 0 0 0 0 0 0 1 0 0 0 0 0 0 0 0 0 0 0 0 0 0 0 0 0 0 0 0 0 0 0 0 0 0 0 0 0 0 0 0 0 0 0 0 0 0 0 0 0 0 0 0 0 0 0 0 0 0 0 0 0 0 0 0 0 0 0 0 0 0 0 0 0 0 0 0 0 0 0 0 0 0 0 0 0 0 0 0 0 0 0 0 0 0 0 0 0 0 0 0 0 0 0 0 0 0 0 0 0 0 0 0 0 0 "D_0__Eukaryota; D_1__Opisthokonta; D_2__Nucletmycea; D_3__Fungi; D_4__Glomeromycota; D_5__Incertae Sedis; D_6__Glomeromycetes; D_7_…
VTX00402 "OTU9.6908508202948e+32" 0 0 0 0 0 0 0 0 0 0 0 0 0 0 0 0 0 0 0 0 0 0 0 0 0 0 0 0 0 0 0 0 0 0 0 0 0 0 0 0 0 0 0 0 0 0 0 0 0 0 0 0 0 0 0 0 0 0 0 0 0 0 0 0 0 0 0 0 0 0 0 0 0 0 0 0 0 0 0 0 0 0 0 0 0 0 0 0 0 0 0 0 0 0 0 0 0 0 0 0 0 0 0 0 1 0 0 0 0 0 0 0 0 0 1 0 "D_0__Eukaryota; D_1__Opisthokonta; D_2__Nucletmycea; D_3__Fungi; D_4__Glomeromycota; D_5__Incertae Sedis; D_6__Glomeromycetes; D_7__…
VTX00402 "OTU5.38497242905237e+32" 0 0 0 1 0 0 0 0 0 0 0 0 0 0 0 0 0 0 0 1 0 0 0 1 0 3 0 0 0 2 0 0 0 0 10 0 0 0 0 0 4 0 0 0 1 3 0 0 0 0 5 0 0 4 0 0 0 3 0 0 0 0 0 0 0 4 0 0 0 0 0 0 0 0 0 0 0 0 0 0 0 1 1 0 0 0 0 0 0 0 0 21 6 0 0 1 0 3 0 0 0 0 0 0 0 0 0 0 0 0 0 0 0 0 0 0 "D_0__Eukaryota; D_1__Opisthokonta; D_2__Nucletmycea; D_3__Fungi; D_4__Glomeromycota; D_5__Incertae Sedis; D_6__Glomeromycetes; D_…
VTX00402 "OTU2.38330834750414e+32" 0 0 0 0 0 0 0 0 0 0 0 0 0 0 0 0 0 0 0 0 0 0 0 0 0 0 0 0 0 0 0 0 0 0 0 0 0 0 0 0 0 0 0 0 0 2 0 0 0 2 0 0 0 11 3 4 1 0 0 0 0 0 0 0 0 29 2 0 8 0 0 0 0 3 0 1 1 1 0 0 0 10 0 8 0 1 0 0 0 0 27 0 0 15 1 0 35 0 2 4 11 0 0 64 109 17 6 0 8 2 0 25 0 0 117 0 "D_0__Eukaryota; D_1__Opisthokonta; D_2__Nucletmycea; D_3__Fungi; D_4__Glomeromycota; D_5__Incertae Sedis; D_6__Glomer…
VTX00402 "OTU4.91941454519111e+32" 0 1 1 9 7 4 1 1 20 24 0 0 0 0 3 2 0 0 0 0 39 19 0 9 0 0 17 1 1 0 2 0 0 0 13 0 3 1 22 0 3 0 7 4 2 75 0 5 0 1 5 0 0 21 35 14 7 3 19 0 1 20 14 0 0 6 19 5 9 1 0 2 0 54 0 61 7 21 8 0 0 26 43 1 0 6 0 0 0 21 11 13 0 14 23 7 0 33 14 5 1 0 0 26 20 7 0 0 49 0 0 52 10 0 67 0 "D_0__Eukaryota; D_1__Opisthokonta; D_2__Nucletmycea; D_3__Fungi; D_4__Glomeromycota; D_5__Incertae…
VTX00402 "OTU9.48325825354839e+32" 0 14 1 1 0 4 26 7 5 0 10 0 0 0 0 0 5 2 0 13 1 0 1 18 0 9 1 1 0 55 0 0 3 2 71 4 2 2 0 0 0 0 0 1 0 8 0 2 0 0 0 0 0 1 0 9 0 5 0 0 5 0 0 4 0 0 6 0 0 0 0 0 0 0 0 0 0 0 0 0 0 1 0 0 0 0 0 0 0 0 0 19 0 0 0 0 0 0 0 0 0 0 0 0 0 0 0 1 0 0 0 0 0 0 0 0 "D_0__Eukaryota; D_1__Opisthokonta; D_2__Nucletmycea; D_3__Fungi; D_4__Glomeromycota; D_5__Incertae Sedis; D_6__Glomeromycet…
VTX00402 "OTU8.17288798029949e+31" 0 1 0 0 1 1 0 0 5 4 0 0 0 0 0 1 0 0 0 0 8 7 0 0 0 1 7 0 0 0 0 0 0 0 2 0 0 0 6 0 2 0 1 0 1 18 0 1 0 0 0 0 0 3 8 5 1 2 4 0 0 8 4 0 0 2 5 0 0 0 0 0 0 15 0 18 2 8 5 0 0 6 9 4 0 0 0 0 0 4 0 0 0 7 5 2 0 6 4 0 0 0 0 7 12 0 0 0 17 0 0 16 2 0 19 0 "D_0__Eukaryota; D_1__Opisthokonta; D_2__Nucletmycea; D_3__Fungi; D_4__Glomeromycota; D_5__Incertae Sedis; D_6__Glomeromycete…
VTX00402 "OTU5.00416776854479e+32" 0 0 0 0 0 0 0 0 0 0 0 0 0 0 0 0 0 0 0 0 0 0 0 0 0 0 0 0 0 0 0 0 0 0 0 0 0 0 0 0 0 0 0 0 0 7 0 0 0 0 4 0 0 0 2 0 0 0 7 0 0 0 0 0 0 0 1 0 0 0 0 0 0 1 0 1 0 0 0 0 0 0 0 0 0 0 0 0 0 0 4 13 0 0 0 0 0 2 5 0 0 0 0 0 0 0 0 0 1 0 0 0 0 0 0 0 "D_0__Eukaryota; D_1__Opisthokonta; D_2__Nucletmycea; D_3__Fungi; D_4__Glomeromycota; D_5__Incertae Sedis; D_6__Glomeromycetes; D_7…
VTX00402 "OTU7.98159545835581e+32" 0 0 0 0 0 0 0 0 0 0 0 0 0 0 0 0 0 0 0 0 0 0 0 0 0 0 0 0 0 0 0 0 0 0 0 0 0 0 0 0 1 1 0 5 0 0 0 0 9 0 0 0 0 1 6 1 0 0 0 0 2 16 4 0 0 0 0 0 3 0 0 0 0 0 0 0 0 0 0 0 0 0 0 0 0 0 0 0 0 0 0 0 0 0 0 0 0 0 0 3 0 0 0 0 5 0 0 0 0 0 0 0 0 0 0 0 "D_0__Eukaryota; D_1__Opisthokonta; D_2__Nucletmycea; D_3__Fungi; D_4__Glomeromycota; D_5__Incertae Sedis; D_6__Glomeromycetes; D_7…
VTX00402 "OTU8.18350595701453e+32" 0 0 4 12 0 0 0 0 0 0 34 0 0 0 0 0 0 0 0 0 0 0 0 0 0 1 0 0 0 1 0 0 0 0 17 0 0 0 0 0 0 0 0 0 0 0 0 0 0 0 0 0 0 0 0 0 0 0 0 0 0 0 0 1 0 0 0 0 0 0 0 0 0 0 0 0 0 0 0 0 0 0 0 0 0 0 0 0 0 0 0 0 0 0 0 0 0 0 0 0 0 0 0 0 0 0 0 0 0 0 0 0 0 0 0 0 "D_0__Eukaryota; D_1__Opisthokonta; D_2__Nucletmycea; D_3__Fungi; D_4__Glomeromycota; D_5__Incertae Sedis; D_6__Glomeromycetes; D…
VTX00402 "OTU5.75145475903511e+32" 0 3 9 31 0 0 2 1 1 0 105 0 0 0 0 0 1 0 0 2 0 0 0 0 0 1 1 0 0 4 2 0 0 0 27 0 0 0 0 0 0 0 0 0 1 1 0 0 0 0 0 0 0 0 0 0 0 0 0 0 0 0 0 0 0 0 0 0 0 0 0 0 0 0 0 0 0 0 0 0 0 0 0 0 0 0 0 0 0 0 0 1 0 0 0 0 0 0 0 0 0 0 0 0 0 0 0 0 0 0 0 0 0 0 0 0 "D_0__Eukaryota; D_1__Opisthokonta; D_2__Nucletmycea; D_3__Fungi; D_4__Glomeromycota; D_5__Incertae Sedis; D_6__Glomeromycetes; …
VTX00402 "OTU4.39559577491661e+32" 0 0 0 0 0 0 0 0 0 0 0 0 0 0 0 0 0 0 0 0 0 0 0 0 0 0 0 0 0 0 0 0 0 0 0 0 0 0 0 0 0 0 0 0 0 0 0 0 0 0 0 0 0 0 0 0 0 0 0 0 0 0 0 0 0 0 0 0 0 0 0 0 0 0 0 0 0 1 0 0 0 0 0 0 0 0 0 0 0 0 0 0 0 0 0 0 0 0 0 0 0 0 0 0 0 0 0 0 0 0 0 0 0 0 0 0 "D_0__Eukaryota; D_1__Opisthokonta; D_2__Nucletmycea; D_3__Fungi; D_4__Glomeromycota; D_5__Incertae Sedis; D_6__Glomeromycetes; D_7_…
VTX00402 "OTU3.14232739242257e+31" 0 1 0 0 0 0 0 1 0 0 0 0 0 0 0 0 0 0 0 0 1 0 0 0 0 0 0 0 0 8 0 0 0 0 0 0 0 0 0 0 0 0 0 22 0 1 0 0 30 0 0 2 0 6 20 10 0 0 0 0 8 61 30 0 0 0 0 0 4 0 0 6 0 0 0 0 1 0 0 0 0 3 0 3 0 0 0 0 0 0 0 0 0 0 0 0 0 0 0 7 0 0 0 0 20 0 0 0 0 0 0 0 0 0 0 0 "D_0__Eukaryota; D_1__Opisthokonta; D_2__Nucletmycea; D_3__Fungi; D_4__Glomeromycota; D_5__Incertae Sedis; D_6__Glomeromycete…
VTX00402 "OTU1.31323161875336e+31" 0 2 0 1 2 1 8 1 3 0 8 0 0 0 0 0 6 0 0 3 0 0 0 5 0 1 1 1 0 15 0 0 3 0 12 0 2 1 0 0 0 0 0 0 0 0 0 0 0 0 0 0 0 1 0 0 0 2 1 0 2 0 0 0 0 0 3 0 0 0 0 0 0 0 0 0 0 0 0 0 0 0 0 0 0 0 0 0 0 0 0 8 0 0 0 0 0 0 0 0 0 0 0 0 0 0 0 0 0 0 0 0 0 0 0 0 "D_0__Eukaryota; D_1__Opisthokonta; D_2__Nucletmycea; D_3__Fungi; D_4__Glomeromycota; D_5__Incertae Sedis; D_6__Glomeromycetes; D_…
VTX00402 "OTU3.29423123026491e+32" 0 0 0 0 0 0 0 0 0 0 0 0 0 0 0 0 0 0 0 0 1 0 0 0 0 0 0 0 0 0 0 0 0 0 0 0 0 0 0 0 0 0 0 1 0 1 0 0 0 0 0 0 0 2 0 0 0 0 0 0 0 0 0 0 0 10 1 0 4 0 0 0 0 0 0 0 0 0 0 0 0 1 0 4 0 0 0 0 0 0 5 0 0 1 2 0 8 0 1 1 2 0 0 19 29 6 0 0 2 2 0 7 0 0 32 0 "D_0__Eukaryota; D_1__Opisthokonta; D_2__Nucletmycea; D_3__Fungi; D_4__Glomeromycota; D_5__Incertae Sedis; D_6__Glomeromycetes; …
VTX00402 "OTU3.52376049913296e+32" 0 0 0 2 0 1 0 0 0 0 0 1 0 0 0 0 0 0 0 0 0 0 0 0 0 0 0 0 0 0 0 0 0 0 6 0 0 0 0 0 0 0 0 0 0 0 0 0 0 0 0 0 0 2 0 0 0 1 0 0 0 0 0 0 0 0 0 0 0 0 0 0 0 0 0 0 0 0 0 0 0 0 0 0 0 0 0 0 0 0 0 0 0 0 0 0 0 0 0 0 0 0 0 0 0 0 0 0 0 0 0 0 0 0 0 0 "D_0__Eukaryota; D_1__Opisthokonta; D_2__Nucletmycea; D_3__Fungi; D_4__Glomeromycota; D_5__Incertae Sedis; D_6__Glomeromycetes; D_7_…
VTX00402 "OTU3.31993481823794e+32" 0 0 0 0 0 0 0 1 0 0 0 0 0 0 0 0 0 0 0 0 0 0 0 0 0 0 0 0 0 6 0 0 0 0 0 0 0 0 0 0 0 0 0 0 0 0 0 0 0 0 0 0 0 0 0 0 0 2 0 0 0 0 0 0 0 0 0 0 0 0 0 0 0 0 0 0 0 0 0 0 0 0 0 0 0 0 0 0 0 0 0 1 0 0 0 0 0 0 0 0 0 0 0 0 0 0 0 0 0 0 0 0 0 0 0 0 "D_0__Eukaryota; D_1__Opisthokonta; D_2__Nucletmycea; D_3__Fungi; D_4__Glomeromycota; D_5__Incertae Sedis; D_6__Glomeromycetes; D_7_…
VTX00402 "OTU9.49359728049647e+32" 0 0 0 12 0 9 0 2 0 0 1 5 0 0 0 0 0 0 0 5 0 0 0 2 0 9 0 1 0 4 1 0 0 0 36 0 0 0 0 0 16 0 0 0 9 10 0 0 0 0 13 0 0 6 0 0 0 24 0 0 2 0 0 0 0 21 0 0 1 0 0 0 0 0 0 0 0 0 0 0 0 7 1 0 0 1 1 0 5 3 0 66 20 0 0 3 0 3 0 0 0 0 0 0 0 0 0 0 0 0 0 0 0 0 0 0 "D_0__Eukaryota; D_1__Opisthokonta; D_2__Nucletmycea; D_3__Fungi; D_4__Glomeromycota; D_5__Incertae Sedis; D_6__Glomeromyce…
VTX00418 "OTU6.63132264311269e+32" 0 0 18 0 0 0 0 0 0 0 0 0 0 0 0 0 0 0 0 0 0 0 0 0 0 0 0 0 0 0 0 0 0 0 0 0 0 0 0 0 0 0 0 0 0 0 0 0 0 0 0 0 0 2 0 0 0 0 0 2 9 11 61 0 0 0 0 0 0 0 0 0 0 0 0 0 8 0 0 0 0 0 0 8 0 0 0 0 0 0 0 0 0 0 0 0 0 0 0 1 67 1 0 0 0 0 69 43 3 0 0 0 0 4 1 0 "D_0__Eukaryota; D_1__Opisthokonta; D_2__Nucletmycea; D_3__Fungi; D_4__Glomeromycota; D_5__Incertae Sedis; D_6__Glomeromycetes…
VTX00418 "OTU4.84251792792953e+31" 0 0 15 0 1 2 0 0 0 0 0 0 0 0 0 0 0 0 0 0 0 0 0 0 0 0 0 0 0 0 0 0 0 16 20 0 0 0 0 0 0 0 0 0 0 0 0 0 67 0 0 0 0 3 0 0 1 0 0 0 0 0 171 0 0 0 0 0 0 0 0 0 186 0 0 0 46 0 0 0 477 0 0 0 0 0 0 0 0 0 0 0 0 0 0 0 0 0 0 19 37 0 48 0 444 0 0 0 0 0 0 20 0 0 0 0 "D_0__Eukaryota; D_1__Opisthokonta; D_2__Nucletmycea; D_3__Fungi; D_4__Glomeromycota; D_5__Incertae Sedis; D_6__Glo…
VTX00418 "OTU3.88228095263191e+32" 0 0 0 0 0 0 0 0 0 0 0 0 0 0 0 0 0 0 0 0 3 30 0 0 0 0 0 0 0 0 0 0 0 0 0 0 0 0 0 11 5 1 14 71 14 14 11 26 32 29 18 1 29 15 0 7 29 14 1 7 10 15 26 1 0 3 2 3 8 2 0 27 83 13 2 8 6 1 11 6 8 70 0 2 0 1 1 1 0 0 0 0 7 28 4 38 5 1 7 5 4 3 20 0 11 3 13 0 6 4 2 48 1 7 20 28 "D_0__Eukaryota; D_1__Opisthokonta; D_2__Nucletmycea; D_3__Fungi; D_4__Glomeromycota; D_5__Incertae S…
VTX00418 "OTU8.00427203725267e+32" 0 0 0 0 0 0 0 0 0 0 0 0 0 0 0 0 0 0 0 0 0 0 0 0 0 0 0 0 0 0 0 0 0 0 0 0 0 0 0 0 0 0 0 0 0 0 0 0 0 0 0 0 0 0 0 0 0 0 0 0 0 0 0 0 0 0 0 0 0 0 0 0 139 0 0 0 0 0 0 0 0 0 0 0 0 0 0 0 0 0 0 0 0 0 0 0 0 0 0 0 50 344 0 0 0 0 209 0 0 0 0 0 0 0 0 0 "D_0__Eukaryota; D_1__Opisthokonta; D_2__Nucletmycea; D_3__Fungi; D_4__Glomeromycota; D_5__Incertae Sedis; D_6__Glomeromycete…
VTX00418 "OTU2.95282700335029e+32" 0 0 0 1 17 1 4 0 1 8 0 2 0 0 0 0 0 1 0 1 5 29 0 6 0 0 0 0 0 0 0 0 0 1 0 0 0 0 0 14 5 0 20 48 13 12 12 23 1543 23 19 2 18 11 0 9 22 15 1 3 222 9 84 2 4 4 3 1 8 1 1 17 430 11 3 2 91 2 8 2 9 35 0 3 0 19 0 2 1 1 1 1 9 14 10 28 3 5 5 49 3 4 1865 2 599 60 568 449 40 99 887 50 1 439 263 18 "D_0__Eukaryota; D_1__Opisthokonta; D_2__Nucletmycea; D_3__Fungi; D_4__Glomeromy…
VTX00418 "OTU9.40773654842943e+32" 0 0 0 0 0 0 0 0 0 0 0 0 0 0 0 0 0 0 0 0 0 0 0 0 0 7 0 0 0 0 0 0 0 0 0 0 0 0 0 0 0 0 0 0 0 0 0 0 0 0 0 0 0 24 0 0 0 0 0 36 60 0 399 0 0 0 0 0 0 0 0 0 0 0 0 0 0 0 0 0 0 0 0 67 0 0 0 0 0 0 0 0 0 0 0 0 0 0 0 4 156 38 0 0 0 0 1 319 196 0 0 0 0 668 608 0 "D_0__Eukaryota; D_1__Opisthokonta; D_2__Nucletmycea; D_3__Fungi; D_4__Glomeromycota; D_5__Incertae Sedis; D_6__Glo…
VTX00418 "OTU1.35021723378163e+32" 0 0 3 0 0 0 0 0 0 0 0 0 0 0 0 0 0 0 0 0 0 0 0 0 0 0 0 0 0 0 0 0 0 1 2 0 0 0 0 0 0 0 0 0 0 0 0 0 0 0 0 0 0 0 0 0 0 0 0 0 0 0 0 0 0 0 0 0 0 0 0 0 0 0 0 0 0 0 0 0 0 0 0 0 0 0 0 0 0 0 0 0 0 0 0 0 0 0 0 0 0 0 0 0 0 0 0 0 0 0 0 0 0 0 0 0 "D_0__Eukaryota; D_1__Opisthokonta; D_2__Nucletmycea; D_3__Fungi; D_4__Glomeromycota; D_5__Incertae Sedis; D_6__Glomeromycetes; D_7_…
VTX00418 "OTU1.93627429316205e+32" 0 0 0 0 0 0 0 0 0 0 0 0 0 0 0 0 0 0 0 0 0 0 0 0 0 0 0 0 0 0 0 0 0 0 0 0 0 0 0 0 0 0 0 0 0 0 0 0 0 0 0 0 0 0 0 0 0 0 0 0 0 0 0 0 0 0 0 0 0 0 0 0 0 0 0 0 0 0 0 0 0 0 0 0 0 0 0 0 0 0 0 0 0 0 0 0 0 0 0 0 0 0 0 0 0 0 0 0 0 0 8 0 0 0 0 0 "D_0__Eukaryota; D_1__Opisthokonta; D_2__Nucletmycea; D_3__Fungi; D_4__Glomeromycota; D_5__Incertae Sedis; D_6__Glomeromycetes; D_7_…
VTX00419 "OTU2.86805900070625e+32" 0 0 0 0 0 0 0 0 0 0 0 0 0 0 0 0 0 0 0 0 0 0 0 0 0 0 0 0 0 0 0 0 0 0 0 0 0 0 0 0 0 0 0 0 0 0 0 0 0 0 0 0 0 0 0 0 0 0 0 0 0 0 0 0 0 0 0 0 0 0 0 0 9 0 0 0 0 0 0 0 0 0 0 0 0 0 0 0 0 0 0 0 0 0 0 0 0 0 0 0 0 0 0 0 0 0 0 0 12 0 0 0 0 0 0 0 "D_0__Eukaryota; D_1__Opisthokonta; D_2__Nucletmycea; D_3__Fungi; D_4__Glomeromycota; D_5__Incertae Sedis; D_6__Glomeromycetes; D_7…
VTX00423 "OTU1.92163140982874e+32" 4 71 3 2 4 0 123 194 0 22 6 32 0 17 2 2 12 2 1 95 1 2 54 31 10 1 105 38 1 29 24 34 1 0 56 0 2 1 73 0 0 0 13 224 339 24 0 0 2112 2 77 0 5157 3 9 12 2 100 97 1070 12539 2 648 1 0 0 881 0 0 325 0 0 633 248 0 3 1187 1 1 1691 0 0 1 1 0 0 5 2 4188 0 0 0 0 0 0 2817 2431 2 38 12 0 13 482 2 248 0 0 912 3409 16660 1532 193 784 3167 3739 7 "D_0__Eukaryota; D_1__Opisthokont…
VTX00423 "OTU3.93019982388299e+32" 0 0 0 0 0 0 0 0 0 0 0 0 0 0 0 0 0 0 0 0 0 0 0 0 0 0 0 0 0 0 0 0 0 0 0 0 0 0 0 0 0 0 0 2 3 0 0 0 1 0 0 0 0 0 0 0 0 0 1 10 6 0 3 0 0 0 3 0 0 1 0 0 0 0 0 0 2 0 0 14 0 0 0 0 0 0 0 0 1 0 0 0 0 0 0 5 6 0 0 0 0 0 0 0 0 0 0 0 31 40 0 1 8 0 23 0 "D_0__Eukaryota; D_1__Opisthokonta; D_2__Nucletmycea; D_3__Fungi; D_4__Glomeromycota; D_5__Incertae Sedis; D_6__Glomeromycetes;…
